# Supplementary material for: Tbx5 drives Aldh1a2 expression to regulate a RA-Hedgehog-Wnt gene regulatory network coordinating cardiopulmonary development
Source: eLife. 2021 Oct 13;10:e69288. doi: 10.7554/eLife.69288 (PMC8555986; doi:10.7554/eLife.69288)
Supplement: Figure 1—source data 1. — 1588 upregulated genes and 1480 downregulated genes were observed in Tbx5 knockout CPP tissue (≥1.5 fold change and 5% FDR). [file elife-69288-fig1-data1.xlsx]

## Sheet: Sheet1
Supplemental Table S1 related to figure 1
E9.5 Tbx5 KO CPP tissue differentially expressed genes (from Steimle et al 2018; GSEGSE75077)
GeneID	p-value	FDR	FoldChange
Nkx2-1	4.6e-26	3.05e-23	0.047449
Msc	1.58e-28	1.78e-25	0.0484007
Vsnl1	3.04e-42	1.11e-38	0.0507148
Nkx6-1	8.71e-21	2.54e-18	0.0759573
Pnliprp1	4.22e-10	1.5e-08	0.0779665
Ppp1r17	2.44e-14	2.34e-12	0.0923389
Thbs4	2.09e-12	1.28e-10	0.0957367
Epha8	3.34e-10	1.22e-08	0.113197
Csrp3	1.15e-25	6.71e-23	0.113995
Cxcl13	1.92e-27	1.56e-24	0.116278
E030019B13Rik	2.53e-09	7.31e-08	0.11647
Myl1	2.68e-08	5.72e-07	0.126441
Uncx	1.26e-06	1.57e-05	0.126759
Oacyl	1.85e-09	5.59e-08	0.127755
Gja5	6.44e-18	1.24e-15	0.128498
Smpx	2.42e-15	2.87e-13	0.134472
Ftcd	3.29e-06	3.58e-05	0.156729
Mybphl	2.95e-08	6.19e-07	0.16079
Chit1	5.29e-05	0.000380887	0.167023
Pcsk9	2.7e-13	2.09e-11	0.170125
Myog	9.12e-05	0.000597001	0.178061
Cacna2d2	1.14e-18	2.44e-16	0.180629
Synpo2l	1.81e-16	2.74e-14	0.184383
Tnnc1	2.64e-09	7.59e-08	0.186118
Foxl1	2.47e-16	3.53e-14	0.189623
Apobec2	7.57e-12	4.06e-10	0.189913
Mfsd2a	1.04e-05	9.6e-05	0.191381
Ppp1r3a	0.000169932	0.00100771	0.19207
Lrrc10	8.18e-07	1.09e-05	0.193491
Trim54	0.000178665	0.00105179	0.193608
Cckar	0.000153661	0.000925902	0.194778
Fam162b	0.000221549	0.00125656	0.197356
Lhx9	3.06e-10	1.13e-08	0.197688
Myh3	0.00036503	0.00192439	0.198919
Actc1	1.06e-12	7.07e-11	0.203159
Zfp663	4.86e-06	5.03e-05	0.20382
Myo18b	6.58e-09	1.68e-07	0.205662
D030025E07Rik	5.04e-11	2.23e-09	0.207776
Casq1	6.22e-05	0.00043656	0.211034
Mybph	4.52e-05	0.00033378	0.21514
Gal	0.000154222	0.00092813	0.21683
Tmem163	1.88e-05	0.000160134	0.219215
Rps6kl1	3.54e-05	0.000273363	0.220114
Ndst4	4.28e-06	4.52e-05	0.222498
Fam19a1	8.39e-05	0.000555804	0.222665
Pgam2	7.4e-16	9.72e-14	0.224316
Serpina6	0.00118613	0.00520027	0.226254
Wnt16	0.000243689	0.00136357	0.226453
Adora1	5.73e-08	1.1e-06	0.227875
Myl4	3.78e-24	1.53e-21	0.229172
Crhbp	0.000550525	0.00273239	0.230287
Myh6	1.76e-05	0.000150839	0.236406
Jakmip2	1.46e-07	2.51e-06	0.237836
Trdn	0.000537218	0.00267271	0.238216
Klf1	4.65e-10	1.63e-08	0.238387
Ankrd1	4.5e-14	4e-12	0.241405
Nppa	0.00174952	0.00716213	0.243284
C130080G10Rik	0.000190198	0.00110983	0.243295
Meox2	8.09e-07	1.09e-05	0.243398
Sh3bgr	3.86e-15	4.33e-13	0.24448
Arhgap36	1.58e-05	0.000138237	0.244501
Epb4.2	1.33e-10	5.34e-09	0.245774
Ppfia2	0.000316475	0.00170352	0.247969
Saa1	0.00183311	0.00744786	0.248339
Gm5127	0.00127736	0.00554853	0.250238
Cd300e	0.00027121	0.00149237	0.251772
Icam4	0.000390794	0.00203738	0.252729
Hspb3	0.000476216	0.00241201	0.252881
1110008P14Rik	2.36e-13	1.85e-11	0.253433
Rspo2	1.65e-17	2.94e-15	0.253651
Pirt	0.000397873	0.00206469	0.2542
Fsd2	1.24e-05	0.000111872	0.254898
Pik3r3	6.07e-35	1.11e-31	0.257211
Tnni3	3e-10	1.11e-08	0.257982
Hcn1	1.46e-10	5.8e-09	0.259886
Pcnxl2	0.000725386	0.00344996	0.261589
Ihh	1.65e-05	0.000142921	0.262435
Actn2	4.24e-05	0.000317128	0.263574
Dbh	0.00129866	0.00562764	0.264606
Kcng1	1.58e-08	3.66e-07	0.264989
Shh	2.04e-17	3.59e-15	0.268054
Tubb4a	9.53e-19	2.07e-16	0.269141
Fitm1	7.18e-05	0.000491168	0.270275
Plg	0.00067744	0.00326021	0.2713
Lect2	0.00547465	0.0182932	0.272406
Etv2	3.37e-05	0.000262105	0.27508
Sstr4	0.00286646	0.0107452	0.275949
Klhl41	0.000199854	0.00115738	0.276437
Ap3b2	6.84e-07	9.38e-06	0.278522
Ubc	5.57e-19	1.25e-16	0.279187
Rasal1	0.000553982	0.00274487	0.280396
Npy2r	0.00304406	0.0112602	0.281339
Insc	4.45e-05	0.000330329	0.282842
Aldh1a1	1.18e-05	0.000107034	0.284128
Tdrd12	0.00038994	0.00203439	0.28437
Fbxl22	8.61e-09	2.12e-07	0.285837
Rhbg	0.00409131	0.0143827	0.286214
Btn1a1	0.000889701	0.00409391	0.287943
Tbx4	2.77e-06	3.09e-05	0.288372
Lama3	0.000219081	0.00124596	0.288455
Mybpc3	1.01e-06	1.3e-05	0.28888
Gcg	0.00780626	0.024422	0.289259
Adamts20	4.07e-08	8.16e-07	0.289706
Ces1d	3.15e-05	0.000247388	0.289828
Serpina1d	0.00587102	0.0193472	0.28988
Fgg	0.00256326	0.00982843	0.290987
Agmo	0.0073041	0.0231233	0.290991
Cntnap2	3.64e-05	0.000279073	0.291103
Padi3	0.000635317	0.0030798	0.291448
Afp	0.00217472	0.00859398	0.291937
Mov10l1	0.00078571	0.00369112	0.292042
AU021092	0.00631429	0.0205112	0.292647
Heyl	3.46e-09	9.61e-08	0.292834
Wnt2	1.54e-16	2.44e-14	0.295273
Csf2rb	4.25e-07	6.3e-06	0.296176
Foxj1	0.000507475	0.00254558	0.297161
Tg	0.000181257	0.00106448	0.298248
Mylpf	6.81e-06	6.66e-05	0.300129
Myl7	1.46e-13	1.19e-11	0.301225
Sfrp5	0.000255471	0.00142299	0.30202
En1	0.00731292	0.0231417	0.302483
Cited4	2.22e-08	4.89e-07	0.302718
Zcchc5	0.00522035	0.0176252	0.303677
Scd1	2.18e-06	2.52e-05	0.304986
Shox2	1.11e-09	3.55e-08	0.304992
Ccne1	9.28e-12	4.81e-10	0.305201
Sc4mol	5.53e-11	2.4e-09	0.307739
Nppb	0.00200697	0.00804664	0.310489
Snord12	4.37e-07	6.47e-06	0.31052
Hs3st2	0.000930176	0.00424002	0.311754
Klhl30	3.02e-07	4.69e-06	0.312075
6030408B16Rik	0.000517355	0.00258713	0.312401
Steap3	3.23e-06	3.52e-05	0.313101
Pcdh10	1.71e-06	2.04e-05	0.31337
Fbxo32	4.69e-13	3.38e-11	0.316625
Ifitm1	1.86e-07	3.1e-06	0.321371
Sp5	4.89e-06	5.06e-05	0.321581
Tmem158	2.89e-07	4.52e-06	0.321643
Asgr2	0.00781744	0.0244517	0.322321
Lin7a	8.15e-05	0.000542698	0.322722
Pnmt	0.00136257	0.00585586	0.323557
Trim10	3.45e-09	9.61e-08	0.325238
Ptch2	9.39e-08	1.68e-06	0.325458
Pcdhac2	0.00693513	0.0222015	0.325534
Gldc	1.63e-14	1.62e-12	0.326144
Cldn13	0.00959829	0.0288939	0.326822
Bmx	0.00859165	0.0263921	0.327068
E130006D01Rik	0.00203608	0.00813649	0.328526
Krt5	0.00318774	0.011696	0.329529
Tagln3	7.47e-10	2.47e-08	0.329746
Prr15l	0.0105111	0.0310962	0.330823
Pax1	0.00888336	0.0271347	0.331691
Itih2	0.00319722	0.0117229	0.332119
Xirp1	0.00284218	0.0106838	0.33274
Grk4	0.00210165	0.00834874	0.333416
9430076G02Rik	0.0008867	0.00408526	0.333679
Mvd	4.02e-10	1.44e-08	0.33385
Ctse	0.00138379	0.00592264	0.336717
Mmd2	0.010952	0.0321203	0.337404
Ldlr	6.01e-12	3.31e-10	0.337715
Fbxo40	0.00267133	0.01016	0.337806
Asb2	0.000419923	0.00216207	0.338554
Myadml2	0.0125533	0.0358644	0.338871
Hdhd3	3.98e-05	0.000300962	0.339551
Gmpr	5.43e-06	5.49e-05	0.340163
Cfc1	0.0141669	0.0396129	0.340441
Dhcr24	6.53e-20	1.61e-17	0.340632
Gulo	0.0079916	0.024895	0.34081
Hfe2	0.00550331	0.0183595	0.341002
Hmgcs2	1.29e-05	0.000115972	0.341453
Kcnn4	4.57e-05	0.000336526	0.341498
Foxd1	6.56e-09	1.68e-07	0.342426
Hsd3b1	0.0138418	0.038868	0.342699
Pinx1	6.55e-13	4.52e-11	0.343265
Snord83b	0.00911003	0.0277044	0.344786
Mstn	0.00172831	0.00708922	0.344879
Aqp7	0.0142721	0.0398613	0.345497
Neto1	0.0130465	0.0370341	0.347416
Rgn	0.0117718	0.0340775	0.347715
Cycs	0.000318662	0.00171339	0.347917
Slfn9	1.06e-11	5.4e-10	0.347936
Fam222a	7.59e-09	1.9e-07	0.349913
Tecta	0.0157219	0.0431744	0.349958
Rimbp3	0.00737416	0.02329	0.352611
Cck	0.00694075	0.0222092	0.352645
Sec14l4	0.00850316	0.0262197	0.35287
Fdps	5.03e-09	1.33e-07	0.353108
Magel2	2.03e-11	9.79e-10	0.353583
Dpysl4	3.09e-14	2.82e-12	0.353646
Ccdc96	0.00238361	0.00925997	0.355295
Ncrna00086	1.21e-06	1.52e-05	0.355924
Sp8	0.00327794	0.0119527	0.357086
Atp2a1	0.000115229	0.000728653	0.359268
Grip2	0.00472063	0.016193	0.360142
Gm12295	0.0139712	0.0391861	0.360262
Pvalb	0.0105258	0.0311144	0.360474
AI848285	0.0109574	0.0321231	0.360865
2310040G24Rik	0.0122672	0.0352266	0.360959
Edaradd	0.000259474	0.00144139	0.363138
Saa2	0.0127588	0.0363518	0.366527
Gucy2f	0.000962842	0.00436844	0.366644
Uchl1	1.2e-12	7.89e-11	0.367141
Cyb561	7.84e-06	7.51e-05	0.367377
Acyp2	0.00195149	0.00784794	0.367588
Nr1h3	0.000137781	0.000846306	0.36785
Pax7	0.0182556	0.0486927	0.368163
Angptl1	7.26e-05	0.000494762	0.368185
Slc25a35	0.0129203	0.0367404	0.36907
Rec8	0.00919694	0.027893	0.369255
Aqp11	0.00047926	0.0024249	0.371128
A1cf	0.0129253	0.0367473	0.37136
Prdm8	0.00715806	0.0227752	0.37268
Adprhl1	0.00774145	0.0242452	0.373457
Srpk3	0.00494367	0.0168431	0.373569
Aldh1b1	0.000166108	0.000987438	0.37371
Kcng2	0.00161923	0.00672889	0.373789
Lmo3	0.00782204	0.0244556	0.374204
Taldo1	7.64e-18	1.43e-15	0.374678
Lmod2	0.00159979	0.00665186	0.374969
Acat2	3.54e-11	1.62e-09	0.375197
Rem2	5.11e-07	7.4e-06	0.375699
Slc25a5	1.18e-17	2.12e-15	0.376215
Nsdhl	3.24e-10	1.19e-08	0.376761
Best1	0.0116607	0.0338112	0.377267
Ikzf1	9.61e-05	0.000625475	0.377845
Lrp8	2.03e-10	7.82e-09	0.377951
2700046A07Rik	0.00433962	0.0150955	0.379718
Cntn2	3.34e-06	3.64e-05	0.380789
Baalc	0.0141586	0.0396121	0.380821
Cpa2	3.29e-05	0.000257322	0.382206
Nxpe2	0.0124964	0.0357477	0.383052
Tnnt2	1.52e-10	6e-09	0.384573
Cyp4f15	0.00581049	0.0191824	0.385292
Ldb3	1.15e-07	2.02e-06	0.385593
H2-Q1	0.00889478	0.0271574	0.385624
Sqle	4e-12	2.36e-10	0.386243
Serpinc1	0.00492925	0.0168058	0.386422
Htatip2	0.000386876	0.00202057	0.386485
Cpa1	7.38e-05	0.000500375	0.388033
Spef1	2.14e-08	4.73e-07	0.3883
Gcsh	4.61e-11	2.06e-09	0.388703
Slc25a29	1.77e-05	0.000152306	0.389734
Actn3	0.0010008	0.00450423	0.390481
Chchd10	6.89e-07	9.44e-06	0.390559
Snora44	0.0141024	0.0394779	0.390705
Fam124a	2.48e-05	0.000201428	0.391119
Bpgm	1.54e-10	6.06e-09	0.391888
Bche	1.69e-05	0.000145393	0.391946
BC022687	2.51e-06	2.83e-05	0.392512
Bdh1	4.61e-07	6.78e-06	0.392889
0610040J01Rik	1.42e-05	0.00012582	0.392889
Mvk	2.75e-11	1.3e-09	0.393794
Ufsp1	0.000119337	0.000749107	0.395316
Wfdc2	0.00727295	0.0230402	0.395775
Myl3	0.00918928	0.0278854	0.395939
Rtn4rl1	0.000589627	0.00289006	0.396504
Foxf2	8.4e-05	0.000555804	0.396723
2810408I11Rik	4.62e-06	4.82e-05	0.397492
Hspb2	0.00328411	0.0119696	0.397837
Dmrt2	0.00291153	0.0108626	0.397946
Hmgcs1	1.06e-11	5.4e-10	0.397953
Tslp	0.0176088	0.0473574	0.398959
Tnfrsf19	2.35e-18	4.76e-16	0.399636
Ppa1	1.24e-13	1.04e-11	0.399718
Mrpl20	1.45e-10	5.77e-09	0.399801
Gpr126	0.00200969	0.00805179	0.400314
Lrrc4	0.00075137	0.00355499	0.401111		Immediate ealry target of FGF in Duncan's work
Nap1l5	0.0123387	0.0354008	0.401222
Ppp1r14b	5.44e-12	3.06e-10	0.401651
Slc17a7	0.0178856	0.047938	0.401835
Cndp2	4.08e-14	3.65e-12	0.402196
Polr2l	9.71e-05	0.000630775	0.40265
Crip1	1.82e-05	0.000155398	0.40417
Vwce	0.000888192	0.00408941	0.404225
Enpep	1.49e-07	2.57e-06	0.404801
Pklr	0.000144955	0.000880359	0.404847
Ptges2	1.28e-12	8.32e-11	0.406185
Tuba1c	5.06e-07	7.32e-06	0.406569
Ccdc124	5.52e-15	6.05e-13	0.407175
Aldh1a2	1.66e-12	1.04e-10	0.40848
Calca	0.00903974	0.0275481	0.409398
2810417H13Rik	1.51e-07	2.59e-06	0.410737
Gm10664	4.74e-05	0.000347406	0.411199
Bysl	7.75e-13	5.31e-11	0.411217
Kcne1l	6.64e-07	9.13e-06	0.411631
Gpn2	1.24e-12	8.09e-11	0.411705
Snord52	0.000117179	0.000738484	0.411871
Lactb	1.77e-08	4.03e-07	0.412704
Rhd	0.00145499	0.00615867	0.413043
Rab33a	0.00223725	0.0087934	0.413113
Ermap	5.39e-06	5.46e-05	0.413295
Nme1	9.52e-13	6.39e-11	0.413379
Akr1b8	1.53e-05	0.000134191	0.414084
Hemgn	1.67e-05	0.000144553	0.414427
Rxfp3	0.00260176	0.00994205	0.415108
Qprt	0.000392629	0.00204257	0.415135
Tnnt1	0.00144886	0.00613986	0.415365
Atp5g1	4.58e-06	4.78e-05	0.415403
Ankrd9	5.04e-05	0.000366451	0.41548
Rrm2	2.19e-19	5.07e-17	0.417008
Ank1	1.33e-07	2.31e-06	0.417055
Pappa2	0.000509149	0.00255134	0.419656
Itpa	1.51e-09	4.64e-08	0.419727
Ggct	0.00030129	0.00163126	0.420816
Mrps11	4.03e-12	2.37e-10	0.4212
Tmem251	1.11e-06	1.41e-05	0.421364
Mtfp1	1.05e-07	1.87e-06	0.42156
Tll1	2.32e-07	3.77e-06	0.421748
Tdo2	0.0086679	0.0265592	0.422679
Klhl31	0.00378471	0.0134771	0.422774
Trim55	2.75e-05	0.000220018	0.422895
Dner	0.016508	0.0449859	0.423406
Asf1b	1.9e-10	7.38e-09	0.423737
3000002C10Rik	0.00628507	0.0204345	0.423972
Nkain4	8.45e-07	1.12e-05	0.426479
Unc45b	0.000619232	0.00301328	0.426731
Acot7	1.78e-13	1.41e-11	0.427077
Foxg1	0.0159232	0.0436288	0.427139
Grin3b	0.00286533	0.0107437	0.427654
Kcnip1	0.000771485	0.003636	0.428247
Rhag	0.000619144	0.00301328	0.428584
Lamc3	0.000907321	0.00415924	0.429291
Dcaf12l1	2.75e-07	4.32e-06	0.429384
Snx11	1.19e-13	1e-11	0.429487
Itgb1bp2	0.00211129	0.00837965	0.429612
E030030I06Rik	0.0148083	0.0410814	0.430246
Ndufaf2	1.95e-06	2.29e-05	0.431122
Atp5k	5.25e-10	1.81e-08	0.432289
Bop1	2.33e-17	4.04e-15	0.432799
Marveld3	0.00720901	0.0228831	0.433103
Mrpl41	2.72e-09	7.75e-08	0.433138
Tmem35	0.00757662	0.0238191	0.433175
Tbl3	4.32e-13	3.2e-11	0.433725
Ttc39a	6.53e-06	6.42e-05	0.433993
Rps27a	4.92e-08	9.64e-07	0.434563
Rspo4	0.0123495	0.0354139	0.435143
Polr1e	5.77e-08	1.11e-06	0.435601
Cenpm	2.99e-08	6.24e-07	0.436646
Hsph1	1.84e-20	5.07e-18	0.437149
Fam49a	1.06e-09	3.42e-08	0.439305
Fabp7	0.0102829	0.0305574	0.440368
Mal	0.00768802	0.0241142	0.440836
Pcbd1	5.83e-05	0.000414466	0.441182
AI118078	0.0155606	0.042796	0.441325
Ap1s3	1.22e-06	1.53e-05	0.441787
Fasn	1.58e-12	9.95e-11	0.44218
4930483K19Rik	0.0123988	0.035536	0.442344
Clic5	0.00671543	0.0216264	0.443215
Rpl27	7.18e-06	6.95e-05	0.443236
Ntn3	9.99e-10	3.24e-08	0.44347
Exosc6	1.64e-10	6.42e-09	0.443746
Ccdc12	8.47e-08	1.54e-06	0.44439
Tcap	0.0132879	0.0375657	0.444806
Osr1	4.04e-12	2.37e-10	0.445199
Shkbp1	1.94e-15	2.34e-13	0.445777
Romo1	5.29e-08	1.03e-06	0.446396
Fam195a	0.000309871	0.00167106	0.446682
Ppp1r14c	4.92e-06	5.08e-05	0.446907
Aqp3	0.00448693	0.0155154	0.44702
Adam1a	0.000564882	0.00279319	0.447192
Mfsd7b	3.13e-10	1.16e-08	0.447205
Pkig	2.78e-06	3.1e-05	0.44753
Rasl2-9	0.00793795	0.0247596	0.448767
Fam89b	4.42e-13	3.23e-11	0.448812
Tor3a	0.00102457	0.00458993	0.448822
Ccnd1	1.22e-12	7.98e-11	0.449214
Msrb2	3.05e-06	3.36e-05	0.449789
Sept1	0.000121231	0.000759685	0.450421
Nagpa	1.56e-06	1.89e-05	0.45091
Vash2	7.81e-15	8.44e-13	0.450921
Tmem100	7.62e-05	0.000513335	0.452094
Slc25a10	5.98e-12	3.31e-10	0.452808
Gata5	1.38e-11	6.92e-10	0.453696
Letm1	9.4e-11	3.92e-09	0.454349
Scn4b	0.00275289	0.0104065	0.454718
Acpl2	5.96e-09	1.55e-07	0.455193
Uqcrq	2.32e-09	6.81e-08	0.457265
Homez	5.2e-11	2.3e-09	0.457357
Shd	1.39e-05	0.00012361	0.457447
Dancr	1.74e-06	2.07e-05	0.457614
Itpka	0.0161446	0.0440945	0.457796
Phlda2	0.0178573	0.0479018	0.457799
Serp2	0.00126345	0.00549468	0.458436
Snord100	0.00455931	0.0157172	0.458738
Wnt2b	2.69e-05	0.000215724	0.459008
Sac3d1	2.42e-09	7.07e-08	0.460976
Doc2a	2.13e-10	8.13e-09	0.460985
Bad	1.39e-08	3.28e-07	0.461221
Rpia	7.53e-07	1.02e-05	0.462016
Lipg	0.000146913	0.000891134	0.462018
Cyb5b	2.13e-13	1.68e-11	0.462239
Isyna1	5.56e-13	3.9e-11	0.462538
Tm7sf2	1.18e-06	1.49e-05	0.463321
Ppp1r1a	2.41e-05	0.000197266	0.463964
Idh1	1.62e-10	6.36e-09	0.464115
Pno1	5e-10	1.73e-08	0.464174
Gja4	0.000238981	0.00134135	0.465804
Usmg5	3.78e-05	0.000287332	0.46583
Tst	8.53e-05	0.000563866	0.466702
Edf1	1.2e-08	2.88e-07	0.466923
Mns1	2.3e-07	3.74e-06	0.466933
Mrpl12	4.69e-09	1.26e-07	0.467343
Ciapin1	2.78e-15	3.27e-13	0.468117
Sncg	0.00411783	0.0144441	0.468319
Fdft1	9.31e-08	1.67e-06	0.468452
Tmem50b	4.62e-14	4.08e-12	0.468471
Mgat5b	0.000145441	0.000882941	0.468497
Tuba4a	2.86e-05	0.000227757	0.468645
Dhrs4	9.13e-12	4.75e-10	0.468706
Aven	5.35e-07	7.67e-06	0.471408
Pcolce2	0.00260996	0.00996356	0.471927
Hspb7	0.000285278	0.00155919	0.472027
Cdk2ap2	1.31e-10	5.29e-09	0.472303
Nutf2	1.53e-08	3.58e-07	0.472531
2210016F16Rik	7.72e-08	1.42e-06	0.472617
Nhp2	1.14e-10	4.67e-09	0.473701
Slmo2	8.36e-13	5.64e-11	0.474135
Thbd	1.53e-06	1.86e-05	0.474202
Sh2d5	0.00159557	0.0066419	0.475212
Snord104	0.00241109	0.0093457	0.475946
Acta1	0.0168844	0.0457637	0.476279
Fads2	8.62e-15	9.24e-13	0.47645
Snord87	0.0115039	0.0334231	0.476537
Scn5a	0.00154853	0.00648309	0.477781
Foxh1	0.00921387	0.0279386	0.477941
Atp1b1	1.81e-12	1.12e-10	0.478094
Tpgs2	2.66e-10	9.96e-09	0.478241
Hmg20b	1.38e-14	1.39e-12	0.479151
Hba-x	0.00128731	0.00558814	0.481924
Sec13	1.08e-14	1.12e-12	0.482491
Gata1	0.000634039	0.0030757	0.483161
Tuba1a	2.29e-14	2.22e-12	0.483475
Rrad	0.00118547	0.00519896	0.483512
Dusp9	3.91e-12	2.32e-10	0.483529
Rspo1	3.97e-10	1.43e-08	0.48375
Smcr7	5.7e-09	1.49e-07	0.483847
Bves	1e-07	1.78e-06	0.483853
Snf8	3.15e-07	4.85e-06	0.48404
Aacs	1.46e-06	1.78e-05	0.484341
Plaur	0.000895635	0.00411862	0.484416
Bok	6.38e-06	6.28e-05	0.485344
Sgk1	2.06e-08	4.59e-07	0.48537
Loh12cr1	0.00010876	0.000694674	0.485439
Tk1	1.44e-10	5.75e-09	0.485827
Rbmxl1	8.24e-11	3.47e-09	0.486222
Gdnf	0.000131411	0.000812999	0.487528
Cdk2ap1	0.000161199	0.000961708	0.487839
Trmt61a	2.74e-07	4.31e-06	0.488515
Hopx	0.00815741	0.0253142	0.488726
2700094K13Rik	3.31e-10	1.21e-08	0.488902
Dbi	6.02e-10	2.05e-08	0.489013
Prr7	0.00136471	0.00586163	0.489245
Rbm38	1.06e-11	5.4e-10	0.490129
Ankdd1b	0.00734812	0.0232279	0.490221
Sdhaf1	4.83e-06	5.01e-05	0.490496
Mrpl34	1.8e-09	5.44e-08	0.491068
Slc4a1	0.00427558	0.0149075	0.491103
Rpp25l	2.78e-11	1.3e-09	0.491123
Cdc34	1.96e-10	7.56e-09	0.49154
Scara3	4.06e-06	4.31e-05	0.491562
Abcg4	0.00157732	0.00658095	0.491704
Tmem121	0.000253929	0.00141706	0.491869
Sigmar1	2.11e-10	8.07e-09	0.492084
Rpusd3	0.00010863	0.000694303	0.492377
Gsta4	3.03e-05	0.00023944	0.492465
Srxn1	3.33e-05	0.000260032	0.492549
Myb	0.000958802	0.00435282	0.492612
Rcc1	4.76e-13	3.42e-11	0.493264
Arl2bp	1.14e-11	5.77e-10	0.493281
Fam110a	4.7e-08	9.26e-07	0.493672
Dhcr7	2.3e-09	6.75e-08	0.493914
Gm10069	0.0136716	0.0384641	0.494386
Pop5	3.64e-07	5.52e-06	0.494406
Txnrd1	4.05e-17	6.88e-15	0.494428
Tbcb	7.69e-11	3.25e-09	0.494446
Ccdc25	6.45e-10	2.18e-08	0.494468
Gltp	1.73e-14	1.7e-12	0.494489
1810019D21Rik	0.0168419	0.0456825	0.494547
Tmem14c	1.1e-09	3.54e-08	0.494548
Sec14l2	0.00181823	0.00739771	0.494679
Dok3	0.00261149	0.00996356	0.494791
Trim7	3.14e-05	0.000246862	0.495526
Cap2	1.46e-07	2.51e-06	0.495645
Samd10	1.5e-06	1.82e-05	0.495713
Arg1	2.23e-05	0.000184223	0.496044		postively regualted by 25nM RA in NMPs (Cunningham et al 2016 5(12): 1821–1833.
Idi1	0.0101928	0.0303537	0.49608
E130309D02Rik	1.69e-13	1.36e-11	0.496143
Snrpa1	1.34e-08	3.18e-07	0.496328
Foxf1	6.83e-06	6.67e-05	0.496387
Psmb3	2.43e-07	3.92e-06	0.496469
Psmb5	1.99e-06	2.33e-05	0.496586
3425401B19Rik	0.010978	0.0321706	0.497509
Fzd10	0.000519608	0.00259662	0.497639
Ccdc141	1.7e-05	0.000146425	0.497744
Hsd17b7	5.13e-08	1e-06	0.498105
Slc35b1	8.98e-12	4.7e-10	0.498317
Pradc1	1.67e-05	0.000144616	0.498431
Lsp1	1.32e-10	5.32e-09	0.499764
Aim2	0.0186476	0.0495841	0.499918
Polr2k	0.0059201	0.0194649	0.500215
Cd83	0.00496109	0.0168907	0.500294
Wnt4	1.27e-05	0.000114232	0.502402
Fen1	3.64e-15	4.24e-13	0.502655
Cox5a	1.58e-09	4.83e-08	0.502933
Snora61	0.0172419	0.0465336	0.50351
Kcnmb4	9.15e-05	0.000598145	0.503847
Hspa12a	8.77e-05	0.000577545	0.503875
Alpk2	0.000806848	0.00377219	0.504169
Ddit4l	0.00673361	0.0216706	0.504636
Ppm1g	6.53e-10	2.2e-08	0.505134
Trim63	0.00287665	0.0107695	0.505202
Slc39a8	8.95e-06	8.4e-05	0.505261
Uqcr11	3.21e-08	6.64e-07	0.506134
Dhx29	8.08e-09	2.01e-07	0.506305
Hspb1	0.0113582	0.0330854	0.507034
Cby1	1.64e-07	2.77e-06	0.507716
Fam118b	3.61e-07	5.49e-06	0.508077
Idh3a	7.92e-13	5.39e-11	0.508266
4933417G07Rik	0.00335669	0.0122002	0.508288
Rrp12	1.38e-09	4.3e-08	0.508338
Glo1	0.00854328	0.0262934	0.509042
Lig4	5.67e-08	1.1e-06	0.509237
Fam20c	0.000407802	0.00210573	0.509248
Nubp1	1.99e-12	1.22e-10	0.509318
Gmppb	1.35e-07	2.33e-06	0.509853
9330159F19Rik	0.0172684	0.0465707	0.509858
Ndufa5	2.93e-08	6.16e-07	0.510003
Xk	0.000778408	0.00366508	0.510072
Tubb2a-ps2	1.6e-09	4.89e-08	0.510117
Alpl	5.18e-06	5.29e-05	0.510555
Akirin1	2.57e-06	2.89e-05	0.510888
Fam115c	8.2e-07	1.09e-05	0.51097
Eva1a	0.0080631	0.0250802	0.511104
Gpd1l	7.56e-08	1.39e-06	0.511118
Bex4	0.00103696	0.00463405	0.511952
Tmem160	4.46e-07	6.58e-06	0.512125
Relt	0.00114534	0.00504419	0.512267
Ush1c	0.00848428	0.0261886	0.512366
Crip2	4.8e-07	6.99e-06	0.51263
Smpdl3b	0.00562504	0.0186993	0.512818
Nos3	6.35e-07	8.83e-06	0.513052
Psmc5	3.22e-11	1.49e-09	0.513172
Pde9a	0.00128762	0.00558814	0.513184
Lss	0.000210943	0.00120911	0.513407
Ccdc86	2.38e-07	3.86e-06	0.513447
Ripply3	0.00190584	0.00768555	0.51387
Glrx5	1.63e-07	2.77e-06	0.513908
Fam131b	0.000441056	0.00225428	0.513936
Fam64a	5.73e-14	4.98e-12	0.514501
Psmd13	2.82e-14	2.62e-12	0.514779
Snhg4	2.86e-05	0.000227757	0.515528
Rplp0	3.98e-14	3.6e-12	0.515726
Gimap9	0.000685267	0.00329136	0.516364
Timm13	6.88e-08	1.29e-06	0.51651
Grrp1	2.36e-05	0.000193527	0.516655
Pop7	2.37e-06	2.69e-05	0.51671
Tmem223	5.79e-07	8.19e-06	0.516784
Ndufaf4	9.86e-07	1.28e-05	0.516858
Cox7a2	3.72e-07	5.62e-06	0.517248
Cyp51	3.4e-06	3.7e-05	0.517394
Timm10	7e-09	1.77e-07	0.517463
9630033F20Rik	2.71e-07	4.28e-06	0.517689
Znhit2	5.72e-06	5.73e-05	0.518288
Tmem97	1.55e-05	0.000136255	0.51846
Vtn	0.00130921	0.00567167	0.518612
Maob	0.0109769	0.0321706	0.519018
Kcnj5	0.00515202	0.0174389	0.519081
Sssca1	1.77e-07	2.97e-06	0.519876
Cib1	1.01e-06	1.3e-05	0.52025
Zfyve28	0.0098689	0.0295621	0.520524
Ube2n	8.22e-09	2.04e-07	0.520551
Ube2f	8.17e-07	1.09e-05	0.520802
Cryab	0.000366804	0.00193165	0.52122
Tppp3	0.000495975	0.00249648	0.521224
Nfatc2ip	2.9e-08	6.1e-07	0.521405
Pcyt2	1.99e-05	0.000167285	0.521467
Pygm	0.00153151	0.00641924	0.521482
Ahsa1	2.91e-13	2.23e-11	0.522232
Tmod1	0.000115009	0.000727774	0.522693
Mcts2	9.43e-07	1.23e-05	0.522781
Polr2i	4.75e-07	6.95e-06	0.522878
Wnt7b	0.00528623	0.0177858	0.523031
Fanca	2.71e-05	0.000217366	0.523208
Dctpp1	8.84e-08	1.6e-06	0.523301
Lsm6	1.4e-08	3.32e-07	0.523488
Abhd8	8.41e-07	1.12e-05	0.524038
Ercc8	2.48e-08	5.35e-07	0.524757
Tubg1	7.8e-12	4.15e-10	0.525556
Aarsd1	2.91e-09	8.23e-08	0.525848
Rhpn1	3.59e-05	0.000276388	0.52623
Ndufa1	2.65e-08	5.66e-07	0.526539
Rnd2	5.58e-05	0.00039906	0.526664
Fam174b	2.94e-08	6.17e-07	0.526674
Frk	0.0032274	0.0118098	0.526712
Tubb4b	1.87e-08	4.24e-07	0.527244
Snn	1.21e-15	1.5e-13	0.527462
Gna14	4.18e-05	0.000313857	0.527471
Klhdc4	2.62e-05	0.000211472	0.527541
Abcb10	2.46e-09	7.17e-08	0.527629
Dnajb5	7.99e-08	1.46e-06	0.52767
Sc5d	4.04e-07	6.03e-06	0.527795
Phf5a	3.54e-10	1.29e-08	0.527808
Hmgcr	7.3e-07	9.93e-06	0.528003
Exosc1	3.77e-08	7.62e-07	0.528053
BC002163	0.000215789	0.00123011	0.528153
Ddt	2.74e-05	0.000219281	0.528562
Qrsl1	1.57e-07	2.66e-06	0.528642
Coprs	6.13e-07	8.57e-06	0.528674
Spta1	0.00144132	0.00611504	0.528771
Gsg2	1.2e-08	2.88e-07	0.529011
Gtf2a2	2.87e-05	0.000228047	0.529042
Rnaseh2c	8.86e-06	8.33e-05	0.530053
Dpf1	4.77e-07	6.95e-06	0.530088
Apex1	1.02e-10	4.23e-09	0.530349
Gal3st3	0.000488745	0.0024652	0.530365
Slc26a6	0.000550422	0.00273239	0.530795
Epb4.9	5.56e-06	5.6e-05	0.530913
Cetn2	2.7e-06	3.02e-05	0.531113
Tsfm	8.29e-10	2.72e-08	0.531273
Nat8l	0.00302984	0.0112135	0.531566
Gyg	4.16e-10	1.48e-08	0.532218
Tdrd1	0.00227464	0.00890675	0.532274
Sf3b4	3.74e-09	1.03e-07	0.532323
Wbscr22	4.98e-10	1.73e-08	0.532812
Cox6c	1.05e-06	1.35e-05	0.533101
Snhg3	0.000166042	0.000987438	0.533711
Cfb	0.00429723	0.0149623	0.533865
Unc45a	6.84e-10	2.29e-08	0.534018
Lyar	2.8e-08	5.93e-07	0.534109
Bola1	7.96e-05	0.00053221	0.534755		Immediate early target of FGF in Steve Duncan's work
Rasl11a	0.00117992	0.00517774	0.534913
Erh	0.000195305	0.00113463	0.534983
Mpi	2.03e-09	6.06e-08	0.53514
Nudt22	0.000233429	0.00131444	0.535178
Ube2l3	2.9e-10	1.08e-08	0.535369
Kti12	5.23e-11	2.3e-09	0.535661
Rangap1	2.13e-16	3.14e-14	0.53569
Atox1	2.81e-09	7.99e-08	0.535937
Kbtbd8	6.85e-05	0.000472842	0.536243
Fez1	0.00708151	0.0225661	0.536263
Sdf2l1	6.22e-11	2.68e-09	0.536694
Myocd	0.0011563	0.00508632	0.536766
Rtn1	0.00175103	0.0071643	0.537016
Trp53rk	0.00133727	0.00577267	0.537179
Art5	0.0160413	0.0439112	0.537467
Eif5a	1.31e-08	3.12e-07	0.53791
Ttpal	1.58e-07	2.69e-06	0.537961
Wdr6	1.11e-17	2.02e-15	0.537991
Ucp2	8.56e-07	1.13e-05	0.538119
Adcy7	0.000231369	0.00130516	0.53849
Arpc5l	3.15e-07	4.85e-06	0.538874
Slc38a5	0.00320543	0.0117441	0.539132
Ppil1	9.57e-12	4.93e-10	0.539556
Tex30	2.49e-05	0.000201661	0.539753
Ptrh2	1.19e-12	7.85e-11	0.539832
Gyg	1.14e-10	4.67e-09	0.540089
Gcat	4.21e-07	6.25e-06	0.540119
Hsd11b2	6.7e-06	6.55e-05	0.540545
Pcbp4	4.05e-09	1.1e-07	0.540961
Map2k2	1.53e-08	3.58e-07	0.541065
Brms1	4.68e-09	1.25e-07	0.541098
Flywch2	0.0039698	0.0140062	0.541378
Trp53inp2	9.98e-12	5.12e-10	0.541598
Pitpnm1	0.00238389	0.00925997	0.542247
Ndufa11	1.06e-06	1.35e-05	0.542321
Ppargc1a	0.000641688	0.0031066	0.542335
Pdss1	1.68e-05	0.000145154	0.542892
Tal1	1.75e-05	0.000150839	0.542933
Usp43	0.0141498	0.0395955	0.543481
Rimkla	0.0152674	0.0421088	0.543611
Ssna1	1.07e-07	1.9e-06	0.544894
1500032L24Rik	1.24e-06	1.55e-05	0.54503
Gamt	0.000228532	0.00129064	0.545034
2610019E17Rik	0.00515793	0.0174495	0.545175
1810022K09Rik	0.00207805	0.00827248	0.545283
Zfp599	0.00013573	0.000835111	0.545413
Snrpb	2.13e-11	1.02e-09	0.54585
Ret	0.000989403	0.00446257	0.54599
Rbm43	0.00105627	0.00470666	0.546331
Asb13	1.05e-06	1.35e-05	0.546407
Dnaja4	0.000347152	0.00184079	0.546478
Nup93	1.16e-11	5.87e-10	0.54669
Rps12	0.00104233	0.00465237	0.546884
Swsap1	0.000136588	0.000839327	0.5469
Ndufa4	7.81e-09	1.95e-07	0.547165
Glrx	5.48e-05	0.000392576	0.547807
1700086O06Rik	0.00117353	0.0051528	0.548007
Mdh2	6.32e-11	2.72e-09	0.548245
Nkain1	1.91e-08	4.33e-07	0.548457
Mrpl22	1.98e-05	0.000166531	0.548468
Hspbp1	1.27e-09	3.99e-08	0.5485
Cacybp	6.64e-07	9.13e-06	0.548639
Zfp385a	5.12e-08	9.99e-07	0.549054
N6amt2	9.73e-07	1.26e-05	0.549158
Guk1	6.97e-07	9.5e-06	0.549184
Nedd8	3.94e-08	7.93e-07	0.549747
Kel	0.00494605	0.0168473	0.550442
Rps27l	2.81e-08	5.93e-07	0.550971
Stox1	0.00719713	0.0228596	0.551009
Tyms	1.25e-13	1.04e-11	0.551037
Mrps12	1.65e-06	1.97e-05	0.551256
Rexo2	8.86e-10	2.89e-08	0.551375
Sarm1	0.0133548	0.0377111	0.5514
Gtf3c6	3.5e-09	9.68e-08	0.551666
Cyc1	2.85e-09	8.11e-08	0.551667
Jagn1	6.49e-07	8.98e-06	0.551797
D030028A08Rik	0.00184396	0.00748151	0.552161
Ehd1	1.31e-09	4.1e-08	0.552923
Ppp2r1b	5.35e-13	3.77e-11	0.552956
Lhx6	0.00281626	0.0106006	0.553005
Nme3	4.61e-06	4.81e-05	0.553084
C630043F03Rik	8.59e-06	8.14e-05	0.553115
Rrp9	1.67e-05	0.000144616	0.553268
Med8	2.08e-08	4.62e-07	0.553757
Tecrl	4.84e-05	0.000353528	0.553804
Atp5j2	8.89e-08	1.6e-06	0.554139
Myo5c	0.00391526	0.0138473	0.555518
Ctu2	1.7e-08	3.89e-07	0.555559
Gca	0.00318567	0.0116937	0.555613
Smox	5.69e-09	1.49e-07	0.555641
Phb	3.03e-08	6.32e-07	0.555689
Lhfp	1.78e-06	2.1e-05	0.555922
Rps16	0.0013271	0.00573894	0.556048
Lgr5	0.0145787	0.0405472	0.556095
Tssc1	7.57e-05	0.000510574	0.556515
Emc8	3.94e-16	5.52e-14	0.556718
Rps4y2	1.47e-06	1.8e-05	0.556888
Col9a1	0.000164742	0.000980915	0.557136
Hras1	1.57e-08	3.62e-07	0.55721
Psmc4	6.96e-10	2.32e-08	0.55754
Sost	0.000923548	0.00421909	0.558058
Pir	0.0058758	0.0193498	0.558126
4833439L19Rik	2.44e-09	7.12e-08	0.55821
Tyms-ps	3.51e-06	3.79e-05	0.558444
Psmc2	1e-08	2.45e-07	0.558768
Mrto4	4.89e-06	5.06e-05	0.55913
Tubb2b	7.86e-10	2.59e-08	0.55928
Rbp1	2.11e-07	3.48e-06	0.559482
Mad1l1	7.84e-12	4.16e-10	0.559515
Wdr18	2.08e-09	6.17e-08	0.559726
Pla2g16	0.00236152	0.00919758	0.559841
Acot1	0.00152188	0.00638576	0.559977
Fam72a	0.00120069	0.00525621	0.560228
Dhrs11	0.00187722	0.00760167	0.560739
Taf9b	0.00152356	0.00638959	0.561087
Blvrb	4.46e-05	0.000330891	0.561116
Car2	0.000636598	0.00308401	0.561122
Nmral1	9.38e-11	3.92e-09	0.561227
Cad	2.46e-07	3.95e-06	0.561491
Tex9	2.77e-08	5.87e-07	0.561593
Mrpl4	1.94e-08	4.39e-07	0.561712
Atp5e	1.61e-06	1.94e-05	0.561836
Alad	0.00020296	0.00117164	0.562062
Tbx18	2.74e-06	3.05e-05	0.562241
Pde12	1.99e-08	4.46e-07	0.562684
Aen	5.5e-07	7.86e-06	0.563063
Zbtb42	0.00105227	0.0046924	0.563065
Mrps28	1.34e-05	0.000120408	0.563069
1110008F13Rik	5.21e-06	5.3e-05	0.563117
Pgd	2.7e-14	2.54e-12	0.563163
Asna1	1.14e-09	3.63e-08	0.563434
Dnph1	1.04e-05	9.56e-05	0.563438
Taf12	3.61e-07	5.48e-06	0.563495
Abcf2	5.36e-11	2.34e-09	0.56351
Sephs2	4.51e-09	1.22e-07	0.56399
Eif2b2	1.19e-09	3.79e-08	0.564011
A730017C20Rik	0.00103821	0.00463539	0.564194
Acsl5	2.37e-07	3.84e-06	0.564295
Sh3bgrl2	3.94e-06	4.2e-05	0.564412
Rtca	4.49e-08	8.94e-07	0.56463
Fbxo34	1.94e-05	0.000163487	0.564641
Gtf2f2	2.12e-06	2.45e-05	0.564795
Ncs1	7.81e-12	4.15e-10	0.565255
Zcchc17	8.5e-06	8.07e-05	0.565338
Pgp	0.000134326	0.00082787	0.565829
D8Ertd738e	2.46e-07	3.95e-06	0.566249
Mrpl18	5.6e-07	7.98e-06	0.566456
Rpa1	9.82e-15	1.04e-12	0.566777
Fam53a	8.19e-07	1.09e-05	0.566883
Cisd1	2.53e-05	0.000204761	0.566912
Slc52a2	5.32e-05	0.000382645	0.567015
Olfml2b	2.45e-05	0.00019948	0.567126
9130401M01Rik	8.6e-06	8.14e-05	0.567284
Slirp	1.52e-05	0.000133991	0.567351
Dnajc9	1.23e-08	2.96e-07	0.567434
Ebp	3.1e-05	0.000244831	0.567492
Lhpp	0.000133859	0.000826039	0.567841
Adrm1	2.11e-05	0.000175746	0.567899
Wdr46	4.95e-09	1.31e-07	0.568321
Il13ra1	0.000155871	0.000935355	0.56871
Shisa4	6.86e-06	6.68e-05	0.568854
Nkrf	1.44e-05	0.000127484	0.56951
Sbk1	4.04e-14	3.64e-12	0.569604
Tmem216	4.36e-06	4.6e-05	0.570304
Cox6a1	2.46e-07	3.95e-06	0.570708
Tmed2	0.00109978	0.00487445	0.571053
Fbl	0.000209467	0.00120206	0.571548
Tomm40l	9.8e-10	3.18e-08	0.571608
Ung	4.06e-07	6.05e-06	0.571749
Med29	0.000206139	0.00118624	0.571814
Sdhb	2.52e-07	4.03e-06	0.572131
Spsb4	4.49e-08	8.94e-07	0.572204
Nme2	1.97e-06	2.31e-05	0.572257
Cdk5r1	0.000261921	0.00145166	0.572511
Tomm40	8.84e-08	1.6e-06	0.572539
Mllt1	8.1e-14	6.9e-12	0.572615
Rab38	0.0187503	0.0497936	0.573037
Smoc1	0.000256896	0.00142979	0.573083
L3mbtl2	6.82e-09	1.73e-07	0.573323
Psmg3	2.06e-08	4.59e-07	0.57347
Gstp1	6.85e-06	6.68e-05	0.573517
Limd2	6.55e-10	2.21e-08	0.573578
Slc16a12	0.000241246	0.0013525	0.574128
Gdpgp1	0.000593507	0.0029042	0.574256
Mrpl36	4.84e-05	0.000353313	0.574429
Dbn1	8.22e-16	1.07e-13	0.574665
Fam117a	4.35e-05	0.000324006	0.574772
Ogdh	2e-18	4.15e-16	0.575169
Atp5g3	9.91e-09	2.42e-07	0.575304
Nde1	9.29e-12	4.81e-10	0.575345
L1td1	0.0073647	0.0232688	0.575389
Ranbp1	5.62e-07	8e-06	0.575466
Dcakd	2.14e-12	1.31e-10	0.575694
Panx1	3.07e-07	4.76e-06	0.576219
Rogdi	1.29e-05	0.000116259	0.576281
Ddx39	1.97e-08	4.44e-07	0.576639
Ddx21	2.57e-07	4.1e-06	0.576697
Pomp	1.68e-07	2.84e-06	0.576923
Psmc3	7.11e-12	3.85e-10	0.576935
Gstt2	0.0144478	0.0402595	0.576968
Ptpn1	6.14e-12	3.35e-10	0.577086
Nt5c	0.000147525	0.000893834	0.577404
Pkia	8.3e-07	1.11e-05	0.577443
Tubb3	0.00165929	0.006866	0.577443
Mbnl3	3.45e-06	3.74e-05	0.577723
Gstm7	0.00262933	0.0100237	0.578994
Cdc6	7.39e-12	3.97e-10	0.579162
Camkk2	2.85e-11	1.33e-09	0.579178
Dph3	1.52e-07	2.6e-06	0.579311
Reep6	0.00136114	0.0058532	0.579436
Snapc5	9.74e-05	0.000632327	0.5796
Arrdc4	0.00309641	0.0114193	0.579601
Elof1	5.87e-08	1.13e-06	0.58031
2310011J03Rik	9.03e-07	1.18e-05	0.580495
Neto2	6.21e-05	0.000436086	0.580644
Wrap53	6.87e-08	1.29e-06	0.580837
Polr2f	2.46e-05	0.000199656	0.580884
Efna4	7.59e-06	7.29e-05	0.580907
Rnf187	3.85e-10	1.39e-08	0.580908
Art4	0.00209379	0.00832379	0.58119
1810043H04Rik	0.00138885	0.00593557	0.58123
Alyref2	0.0101171	0.0301815	0.581306
Cpne5	0.0101269	0.0301984	0.581567
Ublcp1	0.00383882	0.0136398	0.581947
Rmdn2	0.00228487	0.00893961	0.582037
Dpm2	7.04e-08	1.32e-06	0.582098
Nop9	8.44e-08	1.54e-06	0.582107
Umps	5.26e-13	3.72e-11	0.582261
Inip	3.74e-09	1.03e-07	0.582304
Nphp1	3.93e-06	4.19e-05	0.58231
Bola2	7.57e-05	0.000510574	0.58259
Clp1	1.33e-07	2.32e-06	0.582637
Ccdc101	1.01e-05	9.38e-05	0.582867
Atp5o	6.7e-08	1.26e-06	0.582889
Haus4	6.35e-05	0.000444172	0.583096
Ndufb6	3.84e-08	7.75e-07	0.583119
Klhl25	1.6e-07	2.71e-06	0.583237
Grwd1	5.9e-07	8.31e-06	0.583413
Srm	1.51e-06	1.83e-05	0.583477
Hcn4	0.00148409	0.00626185	0.583493
Map1a	1.24e-05	0.0001123	0.583651
Cbx2	3.29e-13	2.46e-11	0.583675
Aes	1.67e-06	2e-05	0.58437
Ptp4a1	0.00533937	0.0179233	0.584941
Psmb10	0.00278726	0.0105186	0.585086
Ttpa	0.00629327	0.0204521	0.585192
Uqcrb	0.00237669	0.00924432	0.585277
Insig1	0.000571354	0.0028204	0.585536
Mrps21	1.02e-06	1.31e-05	0.58558
Ttyh2	0.00307857	0.011365	0.585771
1810009A15Rik	3.59e-05	0.000276388	0.58578
Ost4	4.62e-05	0.000339556	0.586085
Stra6	3.89e-08	7.83e-07	0.586232
Ykt6	1.5e-11	7.47e-10	0.586461
Ddx31	1.78e-06	2.11e-05	0.586938
2810428I15Rik	0.000219615	0.00124802	0.587159
Rpl34	0.00377597	0.0134525	0.587418
Gpx1	7.4e-06	7.13e-05	0.58753
Dnajc15	7.53e-05	0.000508962	0.58755
Mrpl16	2.16e-07	3.54e-06	0.587773
Pank1	2.52e-05	0.000203907	0.587951
Mycl1	9.14e-05	0.000598135	0.588063
Ppfia3	0.0167586	0.0455327	0.588073
Nans	3.82e-12	2.29e-10	0.588328
Mrps24	4.78e-05	0.000349431	0.588535
Slc25a39	7.92e-07	1.07e-05	0.588785
Scly	6.27e-05	0.000439133	0.588866
Trim62	0.000139669	0.000855594	0.589117
Nop10	5.85e-05	0.000415912	0.58932
Fndc4	2.48e-07	3.98e-06	0.589362
Tomm5	6.78e-05	0.000468899	0.589449
Smim11	0.000297696	0.00161441	0.589558
Pcyt1b	3.35e-05	0.000260624	0.589646
Ethe1	0.000583529	0.00286627	0.589848
Nxt1	2.5e-06	2.83e-05	0.590065
Gtf2h5	2.91e-06	3.23e-05	0.590171
Mrps6	5.2e-05	0.000375979	0.590326
Lrrn1	0.00652074	0.0210692	0.590494
Dhfr	3.26e-07	4.99e-06	0.590636
Cmc2	0.000112034	0.000712982	0.590729
Ndufb7	6.23e-08	1.19e-06	0.591077
Fam198b	3.41e-05	0.000264691	0.591278
Psmb6	6.44e-07	8.93e-06	0.591294
Cenpj	7.43e-07	1.01e-05	0.591304
Actl6a	4.38e-09	1.18e-07	0.59148
Tlcd2	0.00154105	0.00645551	0.59156
Gne	5.62e-07	8e-06	0.591892
Srsf2	2.77e-10	1.04e-08	0.592039
Pik3r2	6.9e-07	9.44e-06	0.592177
Nudcd2	1.4e-06	1.71e-05	0.592635
Pdlim4	5.11e-06	5.23e-05	0.59265
Nolc1	2.69e-08	5.73e-07	0.592758
Mphosph10	1.59e-05	0.000138685	0.592959
Vac14	1.17e-06	1.48e-05	0.593198
Bud31	0.000926742	0.00422966	0.593224
Chaf1b	3.54e-05	0.000273618	0.593713
Psmd14	7.18e-08	1.34e-06	0.593749
Dyrk3	0.000872656	0.00403203	0.593847
Dnaja1	1.81e-06	2.14e-05	0.593896
Ift27	2.71e-05	0.000217397	0.59398
Marcksl1	6.14e-09	1.59e-07	0.594187
Pop1	0.00134883	0.00581225	0.594284
Rbpms2	2.82e-07	4.42e-06	0.594429
Zfp428	3.55e-06	3.84e-05	0.594441
Mrpl11	3.25e-05	0.000254467	0.594454
Magoh	1.72e-08	3.93e-07	0.594543
Cnih2	0.000530617	0.00264348	0.594578
Mrps18c	0.000213595	0.00121904	0.594737
Hnrnpab	1.31e-08	3.12e-07	0.594816
Ccdc23	3.61e-05	0.000277774	0.594889
Dnajb11	3.67e-08	7.44e-07	0.594927
Ccnyl1	1.04e-05	9.6e-05	0.59516
9830147E19Rik	0.00691163	0.0221555	0.595223
Lsmd1	3.63e-05	0.000279048	0.59541
Rbm19	1.5e-09	4.62e-08	0.595751
Atp2a2	4.63e-11	2.06e-09	0.595868
Stmn1	7.04e-06	6.83e-05	0.596518
Pde5a	7.91e-08	1.45e-06	0.59671
Aldh4a1	2.96e-06	3.27e-05	0.597092
Shf	2.4e-06	2.72e-05	0.597128
Prdx2	8.28e-08	1.51e-06	0.597247
Tnni1	2.19e-05	0.000180853	0.597279
Gpatch4	3.96e-05	0.000299454	0.597525
Enho	0.00237934	0.00924969	0.597643
Mettl21d	0.000462522	0.00235245	0.597663
Fbxo22	7.41e-10	2.46e-08	0.597703
Coq7	6.61e-05	0.000459697	0.597806
Coq10b	0.00261217	0.00996356	0.598049
Wdr8	8.69e-07	1.14e-05	0.59822
Aifm1	4.19e-11	1.89e-09	0.598245
9430023L20Rik	1.66e-06	1.99e-05	0.598308
Clhc1	1.28e-06	1.59e-05	0.598323
Impa1	2.88e-08	6.08e-07	0.598333
Rfc3	7.34e-14	6.3e-12	0.598419
Ncbp1	1.68e-09	5.11e-08	0.598784
St8sia2	0.000106095	0.000680629	0.598912
Bak1	1.33e-06	1.64e-05	0.599066
Fam210b	3.67e-07	5.55e-06	0.599164
Agfg2	7.04e-06	6.83e-05	0.599327
Mrpl51	0.000268881	0.00148292	0.600156
Cluh	7.29e-08	1.36e-06	0.600192
Arl6ip4	2.9e-07	4.53e-06	0.60061
Magohb	0.00112899	0.00498124	0.600782
Iscu	0.00452998	0.015642	0.601309
Atp5j	6.14e-06	6.09e-05	0.601481
Csnk2b	3.17e-08	6.59e-07	0.601616
Eif2b4	7.11e-08	1.33e-06	0.601859
Chp1	1.57e-06	1.89e-05	0.602224
Asb6	6.15e-06	6.1e-05	0.602317
Cdc42se1	1.54e-08	3.59e-07	0.60256
Add2	0.00396036	0.013983	0.602588
C2cd2l	0.000209562	0.00120214	0.60261
Ctnnbip1	8.55e-07	1.13e-05	0.602748
Mat2a	1.96e-07	3.27e-06	0.602878
Npm3	0.00182862	0.0074353	0.603075
Gps1	6.13e-05	0.000431921	0.603095
Tamm41	4.54e-05	0.000334691	0.603213
Naa10	5.24e-06	5.33e-05	0.603443
Calm1	2.29e-10	8.73e-09	0.603709
Lsm1	0.000160527	0.00095856	0.603724
Cd24a	1.7e-06	2.03e-05	0.603961
Scnn1a	0.0158089	0.0433644	0.604011
Gypa	0.00649478	0.021004	0.604281
Slc20a1	6.33e-08	1.21e-06	0.604416
Ctps	3.78e-06	4.05e-05	0.604461
Myo7a	0.00961906	0.0289445	0.60481
Hypk	2.31e-06	2.63e-05	0.60485
Pa2g4	3.55e-07	5.41e-06	0.604998
Cnp	0.000166425	0.000988923	0.605342
Mtfr1l	1.39e-06	1.7e-05	0.605379
Dusp18	0.000118055	0.000742976	0.605427
Mad2l1	4.77e-07	6.95e-06	0.605592
Msl3l2	0.001236	0.00539135	0.60569
Alyref	6.94e-07	9.48e-06	0.605802
Dynll1	1.4e-07	2.41e-06	0.605861
0610010K14Rik	3.31e-08	6.83e-07	0.606497
Slc35e3	0.000652658	0.00315343	0.60651
Ndrg4	0.000691824	0.0033163	0.606535
Asf1a	1.62e-05	0.000140798	0.606545
Josd2	0.000171426	0.00101574	0.606674
Gpr180	6.08e-05	0.000429447	0.606723
Cdr2	1.41e-05	0.00012543	0.606851
Pdf	1.05e-06	1.34e-05	0.606943
Chmp6	4.37e-06	4.61e-05	0.60713
Vwa2	0.00562438	0.0186993	0.607289
Sms	9.52e-05	0.000619537	0.607487
Psma7	3.85e-07	5.79e-06	0.607588
Uqcr10	3.4e-05	0.000263884	0.607622
Tigd5	0.00207358	0.00826148	0.607689
Ogfr	4.76e-10	1.66e-08	0.607752
Bola3	0.000971856	0.00439975	0.607773
Nap1l2	0.0116907	0.0338881	0.608072
Gcnt2	0.00321832	0.0117854	0.608214
Pnmal2	0.0113903	0.0331589	0.608415
Ltv1	3.07e-06	3.38e-05	0.608635
Pebp1	3.05e-07	4.74e-06	0.609061
Mon1a	0.00233498	0.00910395	0.609427
Macrod2	0.0113239	0.0330315	0.609631
Uchl3	0.000241711	0.00135406	0.609807
Hspe1	1.41e-06	1.72e-05	0.609844
Mid1ip1	0.00221964	0.00874304	0.609982
Lsm3	1.95e-05	0.000164103	0.610137
Wbp1	4.56e-06	4.77e-05	0.610159
Ccdc32	0.000361087	0.00190636	0.610353
Aif1l	5.29e-11	2.32e-09	0.610464
Shfm1	2.28e-06	2.61e-05	0.611275
Plekho1	4.94e-07	7.17e-06	0.611381
Arntl	0.0031023	0.0114352	0.611452
Alg3	1.19e-05	0.000107759	0.611584
Ict1	7.21e-05	0.000492394	0.61159
Acly	1.03e-06	1.33e-05	0.611621
Tomm22	0.000334988	0.00178864	0.611676
Crcp	2.04e-05	0.000170865	0.611811
Gpx7	0.000427025	0.00219256	0.611946
Tarbp2	1.79e-05	0.000153245	0.612005
Ephb1	0.0022472	0.00882778	0.612096
Fam203a	2.89e-06	3.21e-05	0.612171
Snrnp40	1.88e-07	3.14e-06	0.612319
Tesk1	3.31e-07	5.05e-06	0.612499
Lsm2	1.93e-06	2.26e-05	0.612605
Casp8	0.000274842	0.00150894	0.612667
Hmbs	4.97e-06	5.11e-05	0.612767
Nuf2	7.91e-06	7.57e-05	0.612876
H2afy	3.64e-11	1.66e-09	0.612914
Vat1l	0.00382516	0.0136012	0.613431
Mfsd3	0.0158869	0.0435374	0.613535
Mrpl46	7.03e-05	0.000483304	0.613551
Uchl5	0.000371738	0.00195269	0.613831
Gdpd1	2.32e-05	0.000190763	0.614241
Stip1	2.7e-14	2.54e-12	0.614336
Gsr	4.66e-06	4.86e-05	0.614691
Cdkn3	0.00864302	0.0265053	0.614795
Uchl4	0.000367414	0.00193417	0.614917
Nt5dc2	2.96e-06	3.27e-05	0.614988
Msra	0.00058067	0.00285769	0.615031
Zfp593	0.000759212	0.00358395	0.61504
9530082P21Rik	9.61e-07	1.25e-05	0.615065
Denr	1.85e-05	0.000157601	0.615098
Pcna	3.37e-09	9.42e-08	0.615173
H2afy2	4.84e-09	1.29e-07	0.615226
Sf3b5	8.38e-06	7.98e-05	0.615454
Tlcd1	0.0044863	0.0155154	0.615699
Tmod2	0.000126712	0.000787601	0.615727
Cox19	2.33e-05	0.00019122	0.615819
Hspd1	1.33e-08	3.17e-07	0.615946
Gale	0.00118472	0.00519721	0.616076
Psmd6	3.55e-08	7.23e-07	0.61634
Rfng	6.96e-06	6.77e-05	0.616506
Metrn	2.12e-05	0.000176413	0.616654
E2f2	0.000826816	0.00385073	0.61667
Ctdp1	3.8e-07	5.72e-06	0.617064
Opa3	5.78e-07	8.19e-06	0.617288
Psmd7	1.2e-09	3.8e-08	0.617855
Ptms	2.53e-09	7.31e-08	0.617888
Taf6l	1.64e-05	0.000142058	0.618141
Banf1	7.31e-05	0.000497403	0.618333
Txn2	1.55e-07	2.64e-06	0.618385
Sod2	1.28e-06	1.59e-05	0.618542
Slc10a3	0.00437001	0.0151831	0.618615
Rps19bp1	0.000228286	0.00128976	0.618797
Usp39	6.51e-07	9e-06	0.618915
Nadk	3.7e-10	1.34e-08	0.618959
Crabp2	0.000455414	0.00232116	0.61904
Tada2b	3.3e-05	0.000257784	0.619501
Nlgn3	0.0184779	0.0491968	0.619807
Cmklr1	0.00350695	0.0126643	0.619815
Rnmtl1	0.00131917	0.00570977	0.620034
Smarce1	4.52e-06	4.75e-05	0.620044
Rab31	2.64e-07	4.19e-06	0.620071
Gli1	0.00224015	0.00880245	0.620098
Mlf1	0.0139297	0.0390921	0.620218
Klc2	8.96e-06	8.4e-05	0.620256
Dnlz	8.14e-06	7.77e-05	0.620268
Sptbn2	4.49e-05	0.000331994	0.620351
9930014A18Rik	0.0178897	0.047938	0.620476
Urod	4.08e-07	6.08e-06	0.621004
Fkbp4	2.77e-08	5.87e-07	0.621024
E130012A19Rik	0.00128919	0.00559327	0.621075
1110004E09Rik	0.000141739	0.000864067	0.621104
Tusc2	7.47e-07	1.01e-05	0.621132
Tprn	0.00224858	0.00883079	0.621146
Psmd1	5.81e-12	3.25e-10	0.621341
Tceb1	4.52e-05	0.00033354	0.621346
6530402F18Rik	0.00718368	0.0228368	0.621395
Slc46a1	0.0034641	0.0125221	0.621442
Rundc3a	0.0143574	0.0400459	0.621559
Cenpv	0.0110625	0.0323945	0.621596
Pvrl1	8.27e-05	0.000549541	0.621625
Ndufb9	7.56e-05	0.000510574	0.621867
Skp1a	3.77e-06	4.04e-05	0.621907
Cox10	3.21e-06	3.51e-05	0.621961
Npm3-ps1	0.000902005	0.00414138	0.622032
Mtch2	2.03e-08	4.53e-07	0.622157
Noc4l	8.4e-07	1.12e-05	0.62225
Rcan2	0.000229506	0.00129514	0.622947
Sergef	0.0124977	0.0357477	0.623059
Zswim1	2.5e-05	0.000202349	0.623071
Med11	0.000386076	0.00201783	0.623078
Naa60	5.69e-08	1.1e-06	0.623124
Znhit1	0.000180817	0.00106288	0.623283
Chchd2	9.88e-05	0.000639368	0.6233
Rcc2	1.83e-11	8.89e-10	0.623328
Pycrl	2.55e-06	2.87e-05	0.623461
Psmc1	1.49e-05	0.000131527	0.623684
Rpf2	9.32e-05	0.000608084	0.623794
Tmem37	0.0181241	0.048466	0.623829
4930453N24Rik	2.43e-05	0.000198041	0.62383
Hprt	2.99e-06	3.3e-05	0.623903
Mien1	0.000156821	0.000939759	0.623954
Ctxn1	9.02e-06	8.44e-05	0.624305
E2f4	5.96e-09	1.55e-07	0.624719
Mrpl21	0.000498213	0.00250602	0.624748
Hmgn3	0.000780348	0.00367184	0.624826
Slc35g1	0.00565893	0.0187876	0.62486
Cpm	0.00324495	0.0118502	0.62489
Ssu72	6.98e-07	9.51e-06	0.624956
Ndn	2.04e-09	6.07e-08	0.625218
Rbm15b	1.51e-11	7.47e-10	0.625333
Gtse1	1.48e-08	3.47e-07	0.625549
Rfx5	6.3e-05	0.000441355	0.625675
Setd8	5.35e-06	5.43e-05	0.625869
Nacc2	0.000298615	0.00161874	0.62589
Hmgcll1	0.00355044	0.0127833	0.625895
Dnaaf2	1.75e-05	0.000150481	0.625933
Ptma	6.54e-08	1.24e-06	0.626093
Parl	7.04e-05	0.000483461	0.626227
Tmem183a	3.43e-08	7.03e-07	0.626288
Cdh24	0.00028632	0.00156284	0.626438
Cnn1	0.000734863	0.00348594	0.626566
Slc18b1	0.0137511	0.038643	0.626661
Ddc	0.00726949	0.0230343	0.626962
Hn1l	7.94e-08	1.46e-06	0.626997
Chpf	6.44e-05	0.000449566	0.62714
Ercc6l	7.03e-08	1.32e-06	0.627303
Lmo7	0.00115681	0.00508703	0.627425
Cdk18	0.00612629	0.0200344	0.627447
Tprgl	4.15e-07	6.18e-06	0.62749
Suv39h2	4.43e-05	0.000329463	0.627609
Sf3a2	8.96e-07	1.17e-05	0.627626
Snrpg	0.000391358	0.00203813	0.627704
Ahsa2	8.13e-09	2.02e-07	0.627832
Ndufb8	9.08e-06	8.49e-05	0.627852
Mnf1	3.59e-05	0.000276388	0.628199
Dgcr6	4.36e-05	0.000324343	0.628341
Dpy30	0.000168427	0.000999766	0.628456
Lsm4	6.17e-07	8.61e-06	0.628649
Cmtm3	8.33e-05	0.000553003	0.629423
Prdx1	1.31e-05	0.00011782	0.629455
Col22a1	0.00915965	0.0278147	0.629689
Fam73b	2.89e-07	4.52e-06	0.629891
Elac2	1.75e-07	2.94e-06	0.629928
Ube2a	6.18e-06	6.12e-05	0.630014
Fam149a	0.00029918	0.00162059	0.630223
Stk16	1.07e-06	1.36e-05	0.630495
Snrnp25	0.000243384	0.00136239	0.63055
Sept3	0.000140828	0.000861302	0.630603
Pdap1	1.25e-06	1.56e-05	0.630655
Plk1	1.89e-06	2.22e-05	0.630906
Arf5	0.000115649	0.000730672	0.631283
Mfsd5	2.6e-06	2.92e-05	0.63155
Mrps7	9.58e-06	8.93e-05	0.631752
Mpv17l2	0.0179711	0.0481187	0.632768
Tigd3	0.012422	0.0355869	0.632785
Srebf2	4.96e-06	5.11e-05	0.632797
Oprl1	0.00553199	0.0184383	0.63293
Mdh1	1.39e-09	4.32e-08	0.632966
Prkrip1	8.59e-05	0.000566825	0.633353
Akr7a5	0.000295101	0.00160386	0.633494
Tgm4	0.00478644	0.0163802	0.63356
Ndufc1	0.000112454	0.00071445	0.633665
Ecsit	0.000167206	0.000993157	0.633681
Ncbp2	1.67e-08	3.83e-07	0.633696
Elovl6	3.27e-06	3.57e-05	0.633766
Hn1	1.64e-09	4.99e-08	0.633794
Rnpep	1.3e-06	1.61e-05	0.633818
2010107E04Rik	0.000212934	0.00121669	0.633872
Psme3	1.18e-07	2.06e-06	0.633924
Spryd4	0.000286031	0.00156214	0.633961
Tpmt	0.000465131	0.00236408	0.634135
Stat1	0.0125109	0.0357714	0.634272
Snrpc	0.00017602	0.00103916	0.634294
Recql	0.000136392	0.000838478	0.63445
Ide	2.81e-06	3.13e-05	0.634473
Bloc1s1	0.00102177	0.00458022	0.634572
H2-Q4	0.00549048	0.0183334	0.634615
Psma2	5.63e-06	5.65e-05	0.634627
Haus7	2.07e-07	3.42e-06	0.634665
Ndufa3	0.000192701	0.00112264	0.634763
Gss	0.000154212	0.00092813	0.634824
Ptplad1	3.73e-06	4.01e-05	0.635307
Olfm1	4.76e-05	0.000348545	0.635483
Hoxa4	0.00230123	0.008994	0.635688
Gemin4	3.42e-07	5.23e-06	0.635774
Rnf219	1.53e-06	1.85e-05	0.635809
Thop1	4.45e-06	4.68e-05	0.636263
Rnf122	1.89e-05	0.000160851	0.636372
Cpsf2	2.49e-08	5.37e-07	0.63677
Limk1	5.15e-07	7.44e-06	0.636786
Ube2s	0.00636318	0.0206562	0.636817
Ift20	8.26e-06	7.88e-05	0.636867
Twf2	1.92e-05	0.00016253	0.636882
Ap1s1	1.84e-06	2.17e-05	0.637042
Tkt	7.84e-07	1.06e-05	0.63707
Dph2	4.13e-05	0.000310433	0.637104
Snrpd1	0.000160261	0.000957362	0.637169
Smyd1	0.0159357	0.0436495	0.637277
Fis1	1.81e-06	2.13e-05	0.637546
Atpif1	2.08e-05	0.000173881	0.637553
Alas2	0.00275903	0.0104201	0.637729
Tomm7	0.000599587	0.00292785	0.637947
Aprt	3.48e-05	0.000268888	0.638036
Tcf19	1.45e-05	0.00012879	0.638187
Tpst1	3.34e-05	0.000260032	0.638247
Stard10	0.000553532	0.00274358	0.638381
Psma4	8.02e-06	7.66e-05	0.638425
Calm3	3.53e-09	9.74e-08	0.638433
Cd34	1.89e-05	0.0001605	0.639054
Osgep	0.00193373	0.00778294	0.639154
Polr2j	2.03e-05	0.000169818	0.639162
Eme2	0.00579937	0.01915	0.639436
Slc25a15	0.000170366	0.00100987	0.639765
Hint1	1.34e-05	0.000120408	0.639772
Rnaseh2b	0.00663263	0.021393	0.639828
Ywhaq	0.00244559	0.00945679	0.639872
Rhno1	1.11e-06	1.4e-05	0.640167
Bid	0.00548853	0.0183311	0.640207
Mrps23	1.5e-06	1.82e-05	0.640346
Mrps26	0.000159024	0.000951143	0.640394
Chchd4	5.56e-05	0.000397712	0.641018
Rac3	0.00318415	0.0116926	0.641106
Spc24	5.68e-07	8.07e-06	0.641369
D16Ertd472e	0.000114309	0.000723777	0.641387
Pnkp	8.01e-05	0.000535079	0.641408
Eftud2	1.21e-09	3.84e-08	0.641453
Apip	0.000854477	0.00395638	0.641487
Foxk2	2.2e-08	4.85e-07	0.641594
Ube2g2	1.33e-09	4.13e-08	0.641598
Grtp1	0.00890207	0.027174	0.641642
Park7	0.000118376	0.000744674	0.641742
Creld2	4.9e-05	0.000356998	0.641888
Myo19	0.000188874	0.00110255	0.64201
Efna2	1.69e-06	2.02e-05	0.642247
4930594C11Rik	0.0060274	0.0197554	0.642295
Prmt1	1.97e-07	3.27e-06	0.642382
Nr2f6	0.000854348	0.00395638	0.642698
Sumo1	0.000844256	0.00391944	0.642814
Enoph1	2.3e-06	2.63e-05	0.643058
Hmgb3	0.00103672	0.00463405	0.643131
Wars	3.82e-07	5.75e-06	0.643165
Plekhj1	3.61e-06	3.89e-05	0.643256
Ap4s1	0.00926154	0.0280482	0.64338
Fam207a	6.56e-07	9.05e-06	0.643467
Taf10	0.00429175	0.0149504	0.643815
Lpl	0.000974891	0.00440925	0.643904
Tmem141	0.0110919	0.0324522	0.64403
Tmem147	4.14e-05	0.000311057	0.644173
Atp6v0a2	9.01e-05	0.000591609	0.644531
Bccip	1.02e-06	1.31e-05	0.644543
Eif4a3	1.02e-08	2.48e-07	0.64486
Tesk2	0.00377919	0.0134607	0.645018
Slc11a2	9.06e-05	0.000593963	0.645134
Cox7b	4.21e-05	0.000315883	0.64524
Faim	0.000759052	0.00358395	0.645367
Mrpl28	2.36e-05	0.000193566	0.645453
Cables2	0.000177012	0.00104375	0.645504
Cks1b	0.00010035	0.000647766	0.645557
Psmd9	2.14e-07	3.52e-06	0.645595
Rbm8a	3.48e-06	3.77e-05	0.645657
Irf1	0.0148626	0.0411715	0.645998
Aagab	1.49e-05	0.000131449	0.646036
Homer2	9.42e-05	0.000613605	0.64624
Acy1	0.000951176	0.00432223	0.646251
B9d1	0.00100933	0.0045328	0.646454
Ppif	2.52e-05	0.000203829	0.646484
Commd1	0.00071445	0.00340461	0.646503
Psmd4	7.68e-07	1.04e-05	0.646598
Arf2	5.89e-07	8.3e-06	0.646703
Ndufs8	3.95e-06	4.2e-05	0.646709
Polr3k	2.02e-07	3.35e-06	0.646762
Abcb8	2e-08	4.48e-07	0.646824
Slc35a4	4.94e-07	7.17e-06	0.647138
5730559C18Rik	3.74e-06	4.01e-05	0.647191
Spr	9.06e-05	0.000593947	0.647343
Setd6	0.00144731	0.00613509	0.647919
Btbd10	0.000468395	0.00237735	0.64803
Mrps18b	0.000152334	0.000918666	0.648034
Cse1l	7e-10	2.33e-08	0.648075
Ap2s1	9.39e-07	1.22e-05	0.648237
Vps36	0.000150932	0.00091134	0.648305
H2afz	0.000369019	0.00194051	0.648438
Mxd3	0.010405	0.0308574	0.648554
Prpf31	1.46e-09	4.53e-08	0.648593
Pin1	1.81e-07	3.04e-06	0.648615
Mthfd1	3.68e-07	5.57e-06	0.648619
Mrpl43	0.00012774	0.000793313	0.648667
Cdca5	6.36e-06	6.27e-05	0.648696
Dna2	2.17e-08	4.78e-07	0.648731
Tceb2	0.000212402	0.0012151	0.648788
Aurka	4.87e-10	1.7e-08	0.648937
Donson	0.000134499	0.000828237	0.649144
Rbm42	2.66e-06	2.98e-05	0.649174
Abracl	0.00159927	0.0066516	0.649223
Ier5	2.15e-05	0.000178797	0.649279
Psmb7	2.56e-05	0.000206444	0.649353
Tysnd1	0.000140646	0.000860636	0.649417
Nudt4	1.75e-05	0.000150656	0.649452
Sh2b2	0.00322612	0.0118081	0.649682
Acaca	0.000215304	0.00122783	0.649768
Eif3b	4.74e-07	6.95e-06	0.64991
Lpcat4	0.00352535	0.0127244	0.649967
Cdk4	3.73e-06	4.01e-05	0.650067
Klf2	0.0120025	0.0346096	0.650164
Arxes1	0.00719309	0.0228518	0.6502
Mrps25	5.93e-06	5.92e-05	0.65021
Sdc1	4.65e-09	1.25e-07	0.650231
Ndufa2	1.63e-05	0.00014163	0.650349
Ppp1r16a	1.86e-05	0.000158778	0.650582
Acads	1.24e-06	1.55e-05	0.650632
Tor2a	0.00039103	0.00203789	0.650638
Crnkl1	3.01e-05	0.000237768	0.65067
Fastkd5	6.95e-05	0.000478729	0.650967
Pnp	0.000119059	0.000747685	0.651045
Fam188a	0.00218706	0.00863103	0.651274
Arnt2	1.04e-05	9.57e-05	0.651327
Zfp668	5.32e-06	5.39e-05	0.651376
Hspa4	2.69e-09	7.69e-08	0.651491
Actr1a	1.45e-10	5.77e-09	0.651549
Lrfn1	0.00241554	0.00936045	0.651684
Klhl23	7.17e-08	1.34e-06	0.65171
Emilin2	2.94e-07	4.58e-06	0.651783		Immediate / Early FGF target in Stevve Duncan's work
Mrpl53	7.11e-05	0.000487742	0.651784
Zbed4	0.0100582	0.0300306	0.65182
Cs	3.18e-11	1.48e-09	0.651947
Ndufa12	0.000569262	0.00281294	0.652121
Cfl1	7.38e-05	0.000500375	0.65219
Myd88	0.0101935	0.0303537	0.652343
Nudt1	0.000106422	0.000682432	0.652348
Ntmt1	8.75e-06	8.26e-05	0.652352
Thoc5	9.09e-07	1.19e-05	0.652413
Prodh	0.00169282	0.00697506	0.652527
Psmb2	7.8e-05	0.000523337	0.652674
Tssc4	2.56e-07	4.08e-06	0.652694
Ccnj	3.15e-06	3.45e-05	0.652985
Ppil3	0.000361329	0.00190695	0.653049
Ube2v2	0.00320346	0.0117398	0.653145
Tra2b	0.00011724	0.000738484	0.653616
Anapc15	0.00120298	0.00526466	0.653721
Pnkd	3.95e-06	4.2e-05	0.653785
Diablo	1.79e-06	2.12e-05	0.653804
Ulk1	5.86e-05	0.000416028	0.653813
Minos1	6.51e-05	0.000453218	0.653965
Cuta	2.48e-05	0.000201226	0.65404
Yipf1	0.00223281	0.00878306	0.654435
Znhit3	0.000928149	0.00423343	0.65446
Pbdc1	0.000142642	0.000868839	0.654479
Clns1a	3.89e-05	0.00029521	0.654503
Sfrp2	0.0011148	0.00492906	0.654519
Polr2e	2.12e-05	0.000176413	0.654546
Eif1ad	0.00157912	0.00658659	0.654722
Tmem256	0.00519573	0.0175542	0.654728
Naa38	6e-05	0.00042418	0.654834
Cyb561d2	0.00957704	0.0288478	0.654961
0610009D07Rik	0.000110501	0.000704254	0.654982
Sall2	3.53e-07	5.39e-06	0.655045
Pus7l	0.00145641	0.0061629	0.65543
Tdp1	5.75e-06	5.76e-05	0.655563
Anxa3	0.000391241	0.00203813	0.655633
Ndufs6	8.06e-05	0.00053757	0.656183
Snrpd3	0.000147721	0.000894175	0.65619
Sapcd2	0.000573131	0.00282631	0.65626
Prkag1	3.52e-08	7.21e-07	0.656389
Crmp1	8.13e-05	0.000541808	0.6564
Ifit2	0.00448458	0.0155154	0.656492
Mrpl13	4.74e-05	0.000347294	0.656701
Pbk	6.68e-05	0.0004631	0.656749
Incenp	3.2e-08	6.64e-07	0.656945
Dolpp1	0.000446786	0.00228038	0.656995
8430410A17Rik	0.000291615	0.00158965	0.657079
Psma1	1.15e-05	0.000105347	0.657676
Rpusd1	0.000138019	0.000847408	0.657967
Tmem44	0.000398535	0.00206592	0.658118
Akt1	7.81e-10	2.58e-08	0.658365
Ppp2r5b	0.000285041	0.00155861	0.658393
Mgst3	0.00553846	0.0184556	0.658465
Pmvk	0.000269254	0.00148441	0.658489
Eef1d	3.61e-06	3.89e-05	0.658611
H3f3a	0.000203467	0.00117364	0.658755
Psmc3ip	0.00294301	0.0109645	0.65887
Prkaca	1.02e-06	1.31e-05	0.659039
Slc25a37	0.00054169	0.00269404	0.659291
Nploc4	1.13e-08	2.73e-07	0.659653
Tbx2	0.000443157	0.00226423	0.659672
Mrpl38	5.55e-06	5.58e-05	0.659801
H2afj	0.00987389	0.0295649	0.659806
H2-Ke2	7.02e-05	0.00048281	0.659904
Snrpf	0.00626122	0.0203864	0.660319
Tmed5	0.000521097	0.00260227	0.660377
AK010878	0.00171936	0.00706243	0.660416
Prpf19	1.1e-07	1.94e-06	0.66046
Jph2	0.00451195	0.0155908	0.66046
Tmem199	0.000273368	0.00150141	0.660529
Trib1	9.8e-05	0.000635539	0.660759
Tmem41a	0.00145069	0.00614583	0.661542
Bax	0.0002632	0.00145599	0.661556
Gtpbp1	1.06e-06	1.35e-05	0.661594
Map2k3	1.23e-06	1.54e-05	0.661827
Wbscr16	0.000106833	0.000684165	0.66212
Trappc1	0.000113987	0.000722363	0.662161
Rnf166	1.93e-05	0.000163136	0.662161
Sgsm3	0.000162814	0.00097023	0.662343
Fh1	9.31e-08	1.67e-06	0.662823
Daglb	0.0023899	0.00927836	0.662829
Arl3	3.63e-07	5.52e-06	0.663144
Ubl5	0.000183844	0.0010762	0.663179
Smim12	0.00369432	0.0132165	0.663222
Mrpl2	1.9e-05	0.000160995	0.663273
Tmem151b	0.00722165	0.0229076	0.663325
Fkbp3	0.000689669	0.00330814	0.663414
Cisd2	7.95e-05	0.000532066	0.663447
Ppp1r11	0.000336621	0.00179605	0.663578
Manf	2.57e-05	0.000207396	0.66368
Mdfic	1.35e-05	0.000120787	0.663866
Gemin6	0.00322869	0.0118109	0.663871
Psma3	0.00157662	0.00657993	0.663879
Rab1b	2.09e-08	4.64e-07	0.664006
Wdr62	0.000240722	0.00135008	0.664168
Spata2	1.47e-05	0.000130339	0.66424
Kcnh2	8.24e-07	1.1e-05	0.664276
Uqcrc1	5.49e-08	1.06e-06	0.664519
Emp1	0.00546037	0.0182706	0.664588
Rwdd1	0.00255323	0.00980026	0.664594
Snord22	0.00629139	0.0204505	0.664633
Mrps34	0.000357317	0.00188919	0.664651
Zfp280b	5.57e-06	5.6e-05	0.664655
Sec61b	0.000709986	0.00338666	0.664796
Mtx2	0.000342926	0.00182369	0.665192
Nop16	0.000614366	0.00299321	0.665582
Sncaip	0.0105244	0.0311144	0.665634
Ran	3.47e-06	3.77e-05	0.665675
Rrs1	0.000209436	0.00120206	0.665686
Fcf1	0.00144073	0.0061143	0.665743
Gnb1l	0.00134786	0.00581149	0.665866
Tmem29	0.000854656	0.00395638	0.666082
Gipc1	6.94e-07	9.48e-06	0.666087
4930427A07Rik	5.78e-05	0.00041166	0.666097
Prpsap1	1.16e-05	0.000105499	0.666179
Dut	0.000548579	0.00272551	0.666429
Snhg8	0.000474675	0.00240504	0.666591
Mrpl37	3.59e-08	7.31e-07	0.666636
Ndufv1	3.1e-07	4.79e-06	0.666665
Kif3a	1.85e-06	2.18e-05	1.50011
Ttc38	0.0122778	0.0352499	1.50026
Cybasc3	0.00202961	0.00811511	1.50065
Tmem175	0.00707315	0.0225543	1.50116
Cyp1b1	0.00101636	0.00456016	1.50121
Frem1	0.00423947	0.0148001	1.50122
Vkorc1	0.000811942	0.00378993	1.50136
Kif21a	0.00236417	0.00920299	1.50136
Ebf3	0.000971439	0.00439923	1.50166
Pde4dip	1.99e-06	2.33e-05	1.50174
Peg10	1.05e-05	9.62e-05	1.50216
Nabp1	0.000941133	0.00428327	1.50244
Atf6	2.66e-06	2.98e-05	1.50286
Dmtf1	1.96e-05	0.000165324	1.50302
D2hgdh	0.009447	0.0285268	1.50331
Zfp609	0.00109769	0.00486963	1.5037
Wbscr27	0.00729987	0.0231205	1.50396
D430042O09Rik	0.000220046	0.00124901	1.50415
Sft2d2	1.22e-07	2.13e-06	1.50541
Ptprk	2.94e-06	3.26e-05	1.50545
Dact1	0.000297706	0.00161441	1.50554
Naglu	0.00189691	0.00766013	1.50572
Acvrl1	0.000882134	0.00406808	1.50594
Nadkd1	6.85e-08	1.29e-06	1.50618
Braf	0.000440577	0.00225263	1.50629
Zfp57	1.15e-07	2.02e-06	1.50669
Psat1	1.34e-05	0.00012047	1.50685
Smc5	3.35e-05	0.000260624	1.50701
Zfp467	0.00020492	0.00118062	1.50733
Atxn2l	0.000156487	0.000938279	1.50869
Sparcl1	0.00244973	0.00947031	1.50875
Apbb2	2.02e-05	0.000169256	1.50916
Arl5b	0.00765407	0.024018	1.50949
Stbd1	0.000179908	0.00105825	1.50983
Tbc1d15	2.82e-06	3.14e-05	1.51026
Naa16	0.000112069	0.000712982	1.51044
Ajuba	8.66e-08	1.57e-06	1.51053
Pdzrn3	0.000332975	0.00177985	1.51071
BC052040	7.75e-08	1.42e-06	1.51113
Pi4k2b	1.11e-06	1.4e-05	1.51146
Lck	0.00317931	0.0116778	1.51193
Ep300	0.00135204	0.00582262	1.51215
Prkce	0.000148694	0.000898571	1.51224
Zkscan6	0.000875151	0.00404227	1.51239
Phf3	5.69e-08	1.1e-06	1.51241
Mirg	0.0015854	0.00660711	1.51298
Zfp40	0.00204811	0.0081756	1.51307
Dynlt3	5.23e-05	0.000377141	1.51318
Alx3	0.005026	0.0170598	1.51329
Zc2hc1a	8.61e-06	8.14e-05	1.51408
Ralgapa1	0.000806533	0.00377192	1.51419
Esyt1	0.000214162	0.0012218	1.51435
C430049B03Rik	0.000210445	0.00120673	1.51497
Birc2	1.22e-06	1.53e-05	1.51498
Rev3l	0.00774141	0.0242452	1.51513
Ppl	0.00900258	0.0274463	1.51515
Hs1bp3	6.72e-05	0.000464946	1.51564
Gm14325	0.00791012	0.0246849	1.51666
Daam2	0.000155084	0.000931819	1.51699
Gas2l3	2.23e-05	0.000183587	1.51735
Anpep	0.000552007	0.00273788	1.51747
Atp9a	0.00613254	0.0200459	1.51766
Sec24d	0.000261166	0.00144858	1.51786
Cdc42ep3	0.000220646	0.00125193	1.51827
Hoxb2	0.000393824	0.00204732	1.51828
Tnrc6b	0.00966506	0.0290649	1.51855
Cd9	0.00285316	0.0107091	1.51879
Myo9a	0.000292854	0.00159465	1.51879
Perp	0.00454442	0.015677	1.5189
Itgav	6.72e-05	0.000465151	1.51902
Fgf10	0.00337689	0.0122583	1.51918
Rgs16	0.0148485	0.041148	1.51966
Pls1	0.0132318	0.0374508	1.51999
Tab3	5.52e-06	5.57e-05	1.52033
AK129341	0.00237759	0.00924535	1.52052
Lrrc16b	0.000720079	0.00342808	1.52146
Stxbp1	0.000966453	0.00438209	1.52165
Ggt7	0.0187467	0.0497936	1.52194
Nars	8.2e-09	2.03e-07	1.52206
Dusp22	4.35e-05	0.000324006	1.52258
Tmem135	3.96e-05	0.000299454	1.5228
Cln3	0.000115539	0.000730295	1.52371
Pcnx	2.19e-05	0.000180638	1.52395
Ssh1	0.00550082	0.0183554	1.52396
Mynn	1.47e-05	0.000129802	1.52461
Als2cl	0.0142898	0.039903	1.52517
Tmem67	0.00223409	0.00878575	1.5252
Rnf165	0.00085086	0.00394382	1.52569
Tmem87a	3.14e-06	3.44e-05	1.5257
Rttn	0.000524169	0.00261582	1.5259
Gls	4.73e-08	9.3e-07	1.52637
Ermp1	2.77e-08	5.88e-07	1.52701
Steap2	0.000140969	0.000861302	1.52745
Col5a1	4.39e-05	0.000326272	1.52791
Mospd2	0.0184963	0.0492268	1.52851
Plce1	0.00689961	0.0221267	1.52868
Hs3st3b1	0.000628933	0.003055	1.52881
Zfhx3	0.00279768	0.010547	1.52907
Spred2	0.00140231	0.00598188	1.52916
Ccdc18	0.00337848	0.0122611	1.53
Rasal2	0.0134692	0.0379826	1.53087
Dtx3	5.83e-06	5.83e-05	1.53297
Napb	0.0168195	0.045647	1.53348
Higd1a	0.000483285	0.00244269	1.53382
Tpd52	2.15e-05	0.000178797	1.53396
Yipf2	0.00242272	0.0093808	1.53491
Rasgef1b	0.00153112	0.00641924	1.53581
Pkd1	0.0125646	0.0358763	1.53591
Dgka	0.0105522	0.0311672	1.53609
S100pbp	0.000687347	0.00329809	1.53611
Dnalc1	0.00427637	0.0149075	1.53704
Zfp715	3.31e-05	0.000258511	1.53708
Tmed4	2.1e-08	4.65e-07	1.53823
Rnft2	0.00339544	0.0123073	1.53862
Serac1	0.00156031	0.00652118	1.53874
Gdi1	1.86e-06	2.19e-05	1.53891
Ddb2	0.00377359	0.0134506	1.53951
Mdc1	0.000109639	0.000699645	1.53958
Upk3b	0.00095576	0.00434171	1.5397
9430008C03Rik	2.84e-05	0.000226491	1.53972
Arhgap5	0.00272949	0.010338	1.53992
Fcho2	1.36e-05	0.000121734	1.5402
Plcb4	0.0130621	0.0370711	1.54161
Mef2c	7.4e-08	1.37e-06	1.54168
Itgb1	9.16e-09	2.26e-07	1.54168
Rbl2	0.0135013	0.0380511	1.54195
Sepp1	0.00281547	0.0106006	1.542
Nipbl	0.00102659	0.00459757	1.54213
Stat5b	2.16e-05	0.000179107	1.54255
4833420G17Rik	0.00985495	0.0295274	1.54258
Raph1	0.00142878	0.00607242	1.54273
Ripk4	0.00782511	0.02446	1.54303
Smg1	0.00499669	0.0169688	1.54342
Eif4b	3.76e-15	4.28e-13	1.5438
Porcn	0.00465462	0.0159966	1.54397
Zfyve16	0.000173213	0.00102466	1.54423
Ralgapa2	0.000155025	0.000931819	1.54448
Cadm1	4.85e-09	1.29e-07	1.54487
Msrb3	4.13e-06	4.38e-05	1.54497
Aff3	4.99e-06	5.13e-05	1.54511
Tctn1	0.0164244	0.0447749	1.54518
Pcdh1	0.0065074	0.0210391	1.54578
Ovgp1	0.0123862	0.0355123	1.54616
Exoc6b	2.63e-09	7.58e-08	1.54638
Tjp1	7.03e-05	0.000483304	1.54647
Whrn	0.00263412	0.0100341	1.54677
Cox6b2	0.00415241	0.0145344	1.54762
Zcchc11	0.000326901	0.00175188	1.54821
Smyd3	3.34e-05	0.000260032	1.54869
Bicc1	0.00591119	0.0194444	1.54911
Supt20	0.000403724	0.00208836	1.54919
Dusp10	0.0127197	0.0362618	1.54963
Zfp109	0.00491487	0.0167685	1.55007
Bach1	6.53e-05	0.000454571	1.5509
Fam184a	0.0072184	0.0229022	1.55107
Slc12a2	7.48e-09	1.87e-07	1.55119
Rdm1	0.00186436	0.00755591	1.55123
Nrp1	0.00054434	0.00270629	1.55161
Flt4	0.00192045	0.00773806	1.55178
Dgkk	0.0104112	0.0308695	1.55288
Vsig10	0.0118417	0.0342407	1.55317
Mef2d	0.00354211	0.0127628	1.5534
Rsf1	1.54e-05	0.000135251	1.55376
Zbtb44	1.16e-05	0.000105971	1.55408
Arnt	3.31e-09	9.29e-08	1.55439
Suco	1.58e-06	1.9e-05	1.55523
Scamp1	5.21e-09	1.38e-07	1.5566
Lamc1	4.17e-05	0.000313556	1.55689
Piezo1	0.00510077	0.0172815	1.55736
Plekha6	0.000269813	0.00148693	1.55805
Dnajb9	0.00151718	0.00637383	1.55827
Ufl1	1.06e-05	9.74e-05	1.55837
Slc12a6	1.5e-06	1.82e-05	1.5586
Baiap2l1	0.00141477	0.00602516	1.55944
Prdm5	6.7e-05	0.000464416	1.55959
Atp7a	0.000571912	0.00282221	1.55972
A830010M20Rik	0.000432097	0.0022147	1.56022
Rftn1	0.000785331	0.00369052	1.56091
Zfp655	4.03e-05	0.000304005	1.56122
Wwtr1	1.55e-07	2.64e-06	1.56203
Hapln1	8.56e-06	8.11e-05	1.56265
Etl4	5.14e-05	0.000372169	1.56295
Zfp36l1	1.12e-12	7.43e-11	1.56297
Col8a2	0.00427812	0.01491	1.56366
Smarca2	4.65e-08	9.21e-07	1.56384
D14Abb1e	0.000279853	0.00153356	1.56387
Focad	1.68e-05	0.000144727	1.56398
Kcna6	0.0116376	0.0337509	1.56435
Hs3st3a1	0.00355405	0.0127932	1.56592
Atp7b	0.0064101	0.0207854	1.56648
App	6.58e-09	1.68e-07	1.56658
Slc44a1	0.00365816	0.0131065	1.5668
Baz2b	0.00022811	0.00128926	1.56702
Tsga10	0.0154649	0.0425891	1.56745
Dmxl1	0.00206945	0.0082495	1.56748
Vasn	2.64e-06	2.97e-05	1.56785
Tmem59	1.5e-05	0.000132313	1.56797
Cers4	0.0037492	0.0133899	1.56849
Galns	0.000177555	0.00104652	1.56892
Fbxl3	5e-05	0.000363875	1.56905
Lgals8	0.00061416	0.00299321	1.56956
Rcan3	3.68e-05	0.000281642	1.57109
Ets2	9.93e-07	1.28e-05	1.57128
Pcdh7	0.000506408	0.0025411	1.57306
Adamts1	0.000372704	0.00195636	1.5731
Ecscr	0.000905063	0.0041515	1.57364
Crebbp	0.00388872	0.0137768	1.57392
Wls	1.25e-15	1.53e-13	1.57404
Phip	0.000157848	0.000945273	1.57467
Marf1	5.92e-05	0.000419449	1.57536
Kank3	0.000518038	0.00258966	1.57643
Copz2	2.51e-05	0.000203644	1.57694
Shc1	1.57e-08	3.62e-07	1.57772
Tube1	4.77e-07	6.95e-06	1.57777
Mthfd1l	0.000196962	0.00114244	1.5779
Ppm1l	0.00258771	0.00991057	1.57837
Ankrd50	9.9e-07	1.28e-05	1.57858
Akap9	0.000104236	0.000670478	1.57911
Cul9	0.000423785	0.00217746	1.57916
Sfxn4	0.00298962	0.0111069	1.57918
Arhgap32	0.000263743	0.00145789	1.57932
Zxdc	1.98e-05	0.000166365	1.58037
Shroom3	9.82e-07	1.27e-05	1.58065
Kansl1l	0.00011504	0.000727774	1.58105
Cped1	0.00786582	0.0245661	1.5814
Spopl	0.000412225	0.00212555	1.58167
Acadsb	2.21e-06	2.54e-05	1.58219
Usp9x	0.00693705	0.0222028	1.58339
Pfkl	2.16e-05	0.000178797	1.58392
Ubr3	3.54e-05	0.000273175	1.58421
Ak4	3.8e-07	5.73e-06	1.58423
Diap2	0.00544265	0.0182155	1.58454
Ptpn14	0.000359204	0.00189711	1.58496
Gria3	0.00364906	0.0130867	1.58509
Clec14a	0.0118291	0.0342178	1.58591
Sgce	7.83e-07	1.06e-05	1.58617
Golgb1	0.000613477	0.00299088	1.5863
Ghr	0.000117203	0.000738484	1.5866
Zfp677	0.00977556	0.0293549	1.58748
Abcc10	0.00270535	0.0102519	1.58749
Usp31	4.73e-05	0.000346884	1.58791
Smad7	5.26e-05	0.000379481	1.58797
Gabbr1	0.00616076	0.0201111	1.58812
St6galnac3	9.34e-05	0.000609168	1.58901
Zeb1	2.4e-07	3.89e-06	1.58953
Shroom4	0.00523782	0.0176555	1.59076
Lrch3	0.0026322	0.0100295	1.59099
Ly6h	0.018241	0.0486715	1.59104
Ube3a	0.000925884	0.00422706	1.59129
Agrn	0.000724084	0.00344489	1.59183
Xrcc4	0.00147788	0.0062411	1.59194
Zdhhc20	4.21e-10	1.5e-08	1.59299
Stam	1.69e-08	3.87e-07	1.59302
Fam114a1	5.95e-06	5.93e-05	1.59311
Mtmr3	2.25e-08	4.92e-07	1.59374
Tagln	4.53e-05	0.000334269	1.59393
Zswim6	6.05e-08	1.16e-06	1.594
Irf5	0.00246081	0.00949578	1.59416
A230046K03Rik	1.59e-05	0.000138237	1.59515
Sash1	0.000898228	0.00412794	1.59566
Slc4a7	1.78e-05	0.000152586	1.59591
Tgfb1i1	1.59e-05	0.000138366	1.5963
Ngly1	0.000752948	0.00355924	1.59735
Zfp871	0.000417234	0.00215062	1.59747
Tmem66	2.06e-07	3.4e-06	1.59755
B630005N14Rik	4.56e-06	4.77e-05	1.59819
Smarca1	4.5e-06	4.72e-05	1.59874
Susd2	0.0167424	0.0455057	1.59899
Rnf6	1e-05	9.31e-05	1.59914
Atxn7l2	3.6e-07	5.47e-06	1.59927
Xpr1	3.75e-05	0.000285639	1.59967
Pttg1ip	3.25e-07	4.98e-06	1.60041
Spry2	0.000208094	0.00119607	1.60081
Pld1	0.00286205	0.0107341	1.60128
Eea1	0.000159768	0.000954809	1.60187
Lrp11	0.000902758	0.00414354	1.60213
Setd5	1.03e-08	2.49e-07	1.6025
Prx	0.000223659	0.00126656	1.60299
Srgap1	0.00151231	0.0063607	1.60318
Igsf3	1.91e-07	3.19e-06	1.60344
Mast4	0.00117945	0.0051772	1.60351
Plod1	4.62e-06	4.82e-05	1.60368
Zdbf2	0.00042083	0.00216533	1.60433
Parp4	0.00194168	0.00781281	1.60499
Sorcs2	0.00251192	0.00967079	1.60499
Thoc2	0.000255486	0.00142299	1.60506
Arap3	0.00100784	0.00452892	1.6051
Cables1	0.000666756	0.00321409	1.6053
Tceanc	6.12e-05	0.000431392	1.60688
Sparc	9.52e-07	1.24e-05	1.60716
Shank3	0.000361922	0.00190939	1.60728
Spata6	2.33e-06	2.65e-05	1.60745
Pear1	2.76e-05	0.000220302	1.60772
Arl4c	4.58e-08	9.08e-07	1.60783
Zfyve1	4.4e-07	6.51e-06	1.60847
Ghdc	0.00253959	0.00975304	1.60877
Enpp1	0.0180146	0.0482086	1.61017
A630007B06Rik	0.00558415	0.0185909	1.61191
Gna13	3.77e-09	1.03e-07	1.61191
Zfp420	0.00154837	0.00648309	1.6121
Tmem194b	3.64e-05	0.000279421	1.61217
Fgf9	0.00380417	0.0135339	1.61218
Snx25	2e-06	2.34e-05	1.61232
Atp2b1	1.87e-06	2.2e-05	1.61261
Dip2c	0.000225277	0.00127523	1.61282
Btbd7	0.00595437	0.019559	1.6132
Zfp874b	0.000359014	0.00189679	1.61327
Chm	7.19e-05	0.000491582	1.61336
Ldb2	0.000147542	0.000893834	1.61361
Trpc3	0.0108992	0.0320104	1.61436
Arsa	9.11e-06	8.51e-05	1.61514
Ammecr1	0.000155553	0.000934215	1.61577
Dyrk2	0.00212241	0.00841233	1.61644
Siae	6.75e-05	0.000466756	1.61775
Eif4a2	4.61e-10	1.62e-08	1.61815
Dync2h1	0.00129575	0.00562004	1.61832
Vps13c	0.0162334	0.0442789	1.61851
Flcn	2.43e-08	5.26e-07	1.61888
Akt3	5.96e-07	8.38e-06	1.61937
Ppcdc	2.56e-06	2.88e-05	1.61961
Aplp1	0.00260911	0.00996356	1.62024
Tnks1bp1	3.9e-12	2.32e-10	1.621
Ptpn13	5.22e-06	5.31e-05	1.62206
1700025G04Rik	2.23e-08	4.89e-07	1.62247
Atg2b	1.01e-06	1.3e-05	1.62305
Dock6	0.000477346	0.0024169	1.62322
Tiparp	1.61e-06	1.93e-05	1.62326
Sox18	0.000203942	0.00117545	1.62359
Dnahc1	0.000168456	0.000999766	1.62368
Osbpl8	3.35e-05	0.000260624	1.62383
Ubn2	0.00131352	0.00568868	1.62403
Sox7	0.000322928	0.00173314	1.62409
Csf2ra	0.0170866	0.0462259	1.62437
Agbl5	3.68e-06	3.96e-05	1.62438
Lrrc1	0.000178359	0.00105084	1.62449
L1cam	0.00624146	0.0203395	1.62466
Dock8	0.0172049	0.0464641	1.6254
Nfkbiz	0.0039009	0.0138099	1.62569
Frs2	7.47e-05	0.000504992	1.62638
Ptprj	0.00115147	0.00506813	1.62799
Triobp	2.56e-08	5.49e-07	1.62805
Cln6	1.09e-06	1.38e-05	1.62871
Dram2	2.46e-06	2.79e-05	1.63012
Kalrn	5.34e-05	0.000383727	1.63033
Shroom2	0.000131976	0.000815801	1.63047
Spag9	0.000124529	0.000776503	1.63182
Zfp595	0.00162644	0.00674923	1.63236
Sh3bp5	7.23e-08	1.35e-06	1.63266
Cep95	5.88e-07	8.29e-06	1.63272
Ypel3	0.000346927	0.00184026	1.63279
Tfrc	6.53e-06	6.42e-05	1.6333
Pcmtd2	5.2e-06	5.3e-05	1.63345
Chd6	5.88e-05	0.000417068	1.63359
Ppp1r12a	7.56e-05	0.000510574	1.63393
Ash1l	0.00136338	0.00585763	1.63439
Ppm1k	0.00417225	0.0145969	1.63475
C78339	5.1e-06	5.21e-05	1.63527
4632428N05Rik	2.42e-05	0.000197306	1.63538
Phf21a	1.5e-06	1.83e-05	1.63554
Rabgap1l	4.48e-05	0.000331829	1.63562
Atp11b	8.34e-08	1.52e-06	1.6357
Dact2	0.000610208	0.00297693	1.63585
Ctso	0.0032842	0.0119696	1.63604
Alg6	1.33e-06	1.63e-05	1.63606
Atxn7	0.00051009	0.0025543	1.63753
Ltbp3	0.00204914	0.00817748	1.63757
Ybx2	0.00191251	0.00770818	1.63821
Tspan18	9.28e-05	0.000606603	1.63896
Eda2r	0.00243485	0.00942278	1.63925
Gng2	4.5e-08	8.94e-07	1.63954
Adrbk2	0.00144524	0.00612986	1.64064
Mapre3	8.9e-05	0.000585345	1.64077
D430020J02Rik	0.000438397	0.00224306	1.64096
Fgd5	2.43e-05	0.000197904	1.64114
Plcd3	0.00895986	0.0273275	1.64115
Zfp608	2.23e-08	4.89e-07	1.64145
Txndc16	8.01e-05	0.000535079	1.64173
Gm12942	0.0053327	0.0179132	1.64189
AU040320	1.49e-06	1.82e-05	1.6426
Acvr2a	1.26e-09	3.99e-08	1.64299
Adamts10	6.51e-05	0.000453362	1.64344
Ttc17	2.44e-07	3.93e-06	1.64348
Aifm2	0.00442525	0.0153503	1.6437
Airn	0.0130961	0.037132	1.64394
Klf6	1.43e-06	1.74e-05	1.64421
Chic1	0.000107045	0.000685222	1.64487
C030046E11Rik	3.68e-05	0.000281459	1.64497
Nxpe4	0.00442204	0.0153456	1.64501
Myh10	2.63e-06	2.95e-05	1.64514
Rgs9	0.0053834	0.0180545	1.64544
Rsbn1l	1.2e-06	1.51e-05	1.64589
Jmjd1c	0.00019056	0.0011115	1.64675
Plxna3	0.00298131	0.0110845	1.64717
Efha2	0.00124277	0.00541117	1.64724
D930048N14Rik	0.00334651	0.0121693	1.64766
Gnao1	0.000918324	0.00420176	1.64779
Cep44	4.26e-08	8.5e-07	1.6489
Zfp36l2	3.07e-07	4.76e-06	1.64895
Zfp174	0.00757925	0.0238191	1.64902
Plk1s1	2.4e-07	3.89e-06	1.64914
Ctsh	0.0177971	0.0477757	1.64964
Erg	0.000576227	0.00283965	1.65032
Rbms1	4.99e-08	9.75e-07	1.65037
Lphn3	0.00384126	0.0136441	1.65087
Sars	7e-10	2.33e-08	1.65249
Icam2	5.93e-06	5.92e-05	1.65278
Aff4	1.03e-05	9.53e-05	1.65296
Fzd1	1.1e-07	1.94e-06	1.653
Gng8	0.00522883	0.0176416	1.65306
Kdm6b	2.26e-06	2.59e-05	1.65307
Kdm6a	1.58e-05	0.000137939	1.65369
Tbc1d8b	0.00618059	0.0201578	1.65441
Cds2	7.2e-09	1.82e-07	1.65497
Ptprg	2.41e-08	5.23e-07	1.65505
Ikzf4	0.00245315	0.00947601	1.65511
Shprh	1.91e-05	0.000161822	1.65541
Chst3	5.39e-06	5.46e-05	1.65583
Tuft1	0.00176811	0.00722606	1.65624
Rras	3.78e-05	0.000287441	1.65637
Lamb2	0.000383985	0.00200979	1.65648
Stom	0.000227001	0.00128399	1.6565
Tns3	7.24e-06	7e-05	1.65693
Uhmk1	0.00849138	0.0261941	1.65715
Cdyl2	9.34e-05	0.000609168	1.65719
Tbl1x	3.87e-05	0.000293623	1.6576
Spred1	5.7e-10	1.95e-08	1.6584
Atr	6.27e-06	6.19e-05	1.65884
Rnf217	6.02e-07	8.46e-06	1.65906
Ccpg1	1.96e-05	0.000165324	1.65945
Mbtps2	2.34e-08	5.1e-07	1.65971
Fam114a2	2.29e-09	6.74e-08	1.65995
Prex2	0.000456337	0.00232505	1.66015
Magi2	0.0166743	0.0453458	1.66018
Golga3	6.43e-07	8.93e-06	1.66039
Slc25a36	1.07e-07	1.89e-06	1.66142
Trp63	0.0099831	0.0298402	1.66237
Anxa4	0.00607179	0.0198696	1.66342
Cyp4f16	0.0062732	0.0204143	1.66351
Galnt18	0.010456	0.0309569	1.66492
Hmox1	1.13e-05	0.000103287	1.66526
Tmem108	2.93e-05	0.000231695	1.66539
B3gnt2	0.000199662	0.00115672	1.66554
Slc9a5	0.000909897	0.00416843	1.66655
Jpx	0.0113552	0.0330847	1.66717
Pfkfb2	0.00109169	0.00484452	1.66745
Nphp3	1.95e-05	0.000164103	1.66766
Fam162a	0.000160972	0.000960822	1.66802
Snx30	1.38e-06	1.69e-05	1.66821
Egflam	0.000397151	0.00206168	1.67005
Pcmtd1	3.2e-07	4.91e-06	1.67024
Lrch1	1.61e-06	1.93e-05	1.67132
Brwd3	0.00365726	0.0131065	1.67242
Dhdh	4.55e-06	4.77e-05	1.67333
Rusc2	0.000739126	0.00350256	1.67339
Mipol1	0.0035894	0.0129027	1.67367
Sepsecs	0.00135627	0.00583741	1.6739
Map4k5	4.92e-08	9.64e-07	1.67447
Prtg	6.19e-05	0.000435339	1.67479
Gpcpd1	1.7e-06	2.03e-05	1.67487
Fpgt	9.96e-07	1.29e-05	1.67534
Chst11	0.000116697	0.00073602	1.67593
BC003331	2.1e-06	2.44e-05	1.67633
Hmha1	2.68e-07	4.25e-06	1.67665
Pnpla7	0.000722691	0.00343939	1.67706
Arsg	0.00233833	0.00911212	1.67736
Bnip3l	1.71e-07	2.88e-06	1.6781
Tmc4	0.000582506	0.00286286	1.67838
Krt8	2.27e-05	0.000186698	1.67888
Zdhhc17	3.21e-08	6.64e-07	1.68041
Hexa	3.7e-06	3.99e-05	1.68048
D8Ertd82e	1.98e-09	5.93e-08	1.6832
Atp2a3	0.00314433	0.0115638	1.68331
Trpm4	0.000595867	0.00291379	1.68413
Fam46c	0.00535714	0.0179746	1.68415
Dbc1	0.0154543	0.042568	1.68491
Notch4	0.00173983	0.00712844	1.68531
Uggt2	2.89e-05	0.000229269	1.68575
Slc38a6	0.000339432	0.00180907	1.68596
Col3a1	2.4e-06	2.72e-05	1.68627
Rps6ka5	3.46e-05	0.000267941	1.68658
Snx16	0.000535528	0.00266521	1.68669
Prr5l	6.45e-07	8.94e-06	1.68671
Aldoart2	6.16e-06	6.1e-05	1.68689
Pcdhga5	0.00638607	0.0207259	1.68866
Wipi1	1.06e-05	9.69e-05	1.68905
Gm5617	0.0114681	0.0333523	1.68924
4930579G18Rik	0.0101784	0.0303211	1.69102
Slc25a27	0.000673656	0.00324307	1.69123
Tnfsf9	0.0104229	0.0308915	1.6913
Tvp23b	4.53e-07	6.66e-06	1.69136
Spag16	0.0145535	0.0404998	1.69231
Fmn1	0.0113017	0.0329801	1.69276
Morc4	1.94e-05	0.000163487	1.69296
Cnot6l	5.44e-05	0.000390576	1.69298
Kdm5b	9.4e-14	7.97e-12	1.69308
Klf4	0.00225569	0.00885141	1.69364
Gapdh	0.00269905	0.0102371	1.69365
Mpp5	3.14e-07	4.84e-06	1.69422
Celf2	4.1e-06	4.35e-05	1.69619
Aldh18a1	1.61e-12	1.01e-10	1.69667
Rictor	5.43e-06	5.49e-05	1.6972
Ino80d	0.000216016	0.00123093	1.69817
Rad54b	0.000319939	0.00171963	1.69931
Col4a1	5.5e-09	1.44e-07	1.69994
Ppp1r16b	4.86e-05	0.000354405	1.70039
Sp6	0.00040175	0.00207889	1.70046
Nfia	0.00413232	0.0144745	1.70079
Flrt3	0.000969605	0.00439229	1.70092
G2e3	4.66e-08	9.21e-07	1.7012
Ezh1	3.83e-06	4.09e-05	1.70183
Mcam	2.17e-05	0.00017932	1.70186
Efna1	7.63e-05	0.000513819	1.70213
Mthfd2	8.87e-08	1.6e-06	1.70234
Rock2	3.61e-08	7.33e-07	1.7029
4933436C20Rik	0.00538955	0.0180709	1.70323
Eml2	8.52e-06	8.09e-05	1.70443
Tmem209	2.01e-11	9.68e-10	1.70503
[truncated: 1,071 more rows]
