# Supplementary material for: Tbx5 drives Aldh1a2 expression to regulate a RA-Hedgehog-Wnt gene regulatory network coordinating cardiopulmonary development
Source: eLife. 2021 Oct 13;10:e69288. doi: 10.7554/eLife.69288 (PMC8555986; doi:10.7554/eLife.69288)
Supplement: Figure 2—figure supplement 1—source data 1. [file elife-69288-fig2-figsupp1-data1.xlsx]

## Sheet: Sheet1
	fig2 supplement 1 source data
	quantiation of NF34 fg lpm / psHF Aldh1a2 immunostain volume pixel intensity levels
	FileName	ROI Area [µm²]	ROI Mean Intensity	avg mean intensity		p-value	comparison
	MM_MO_1a	24238.5	1703.96	1721.02		0.000855546	MM-MO vs Tbx5-MO
	MM_MO_1b	23516.5	1367.46
	MM_MO_2a	17531.4	2223.69
	MM_MO_2b	21144.1	1460.75
	MM_MO_3a	21231.5	1677.64
	MM_MO_3b	20199.9	1892.61
	Tbx5_MO_1a	21165.4	511.472	575.578
	Tbx5_MO_1b	20996.4	793.244
	Tbx5_MO_2a	19722.9	447.917
	Tbx5_MO_2b	20267.3	491.052
	Tbx5_MO_3a	22894.6	598.433
	Tbx5_MO_3b	21173.8	611.349
	MO_rescue_1a	20510.6	1226.35
	MO_rescue_1b	19368.2	2026.89
	MO_rescue_2a	2073.38	908.927
	MO_rescue_2b	2183.71	1326.86
	MO_rescue_3a	20785.2	1446.25
	MO_rescue_3b	21992.8	18845.4
	FileName	ROI Area [µm²]	ROI Mean Intensity			p-value	comparison
	trop_control_Cas9_only_1a	15047.9	2176.27	2428.52		4.34573e-05	cas9 only vs cas9+tbx5 sgRNA
	trop_control_Cas9_only_1b	15703.1	2032.63
	trop_control_Cas9_only_2a	17239.6	2594.18
	trop_control_Cas9_only_2b	17079.4	2423.61
	trop_control_Cas9_only_3a	19534.7	2889.67
	trop_control_Cas9_only_3b	20.1679	2454.73
	trop_mutant_Cas9+tbx5sgRNA 1a	16337.2	838.836	677.35
	trop_mutant_Cas9+tbx5sgRNA 1b	23374.4	556.655
	trop_mutant_Cas9+tbx5sgRNA 2a	19154.8	850.871
	trop_mutant_Cas9+tbx5sgRNA 2b	21138.9	567.454
	trop_mutant_Cas9+tbx5sgRNA 3a	16741.2	631.148
	trop_mutant_Cas9+tbx5sgRNA 3b	18475.3	619.136
	trop_mut_rescue + human TBX5 RNA 1a	16305.7	2705.32
	trop_mut_rescue + human TBX5 RNA 1b	15660.6	2820.43
	trop_mut_rescue + human TBX5 RNA 2a	14231.4	2557.44
	trop_mut_rescue + human TBX5 RNA 2a	16064.6	2867.87
	trop_mut_rescue + human TBX5 RNA 3a	18919.9	20199.2
	trop_mut_rescue + human TBX5 RNA 3b	19034.5	20188.8
