# Supplementary material for: Tbx5 drives Aldh1a2 expression to regulate a RA-Hedgehog-Wnt gene regulatory network coordinating cardiopulmonary development
Source: eLife. 2021 Oct 13;10:e69288. doi: 10.7554/eLife.69288 (PMC8555986; doi:10.7554/eLife.69288)
Supplement: Figure 2—source data 1. — The tbx5 exon5 sgRNA (targeting the DNA binding domain; Steimle et al., 2018) causes approximately 40% of injected embryos to have a molecular phenotype as revealed by in-situ hybridization. 2 nl of a mixture containing 50 pg/nl sgRNA with 0.5 ng/nl Cas9 protein (PNA Bio CP01-20) was injected on either side of the sperm entry point at the 1 cell stage (total of 200 pg sgRNA and 2 ng Cas9 protein per embryo), embryos were cultured to NF34 and assayed by in-situ hybridization for the indicated genes. [file elife-69288-fig2-data1.xlsx]

## Sheet: Sheet1
Xenpous in-situ hybridization summary of CAS9/CRISPR inection experiments
	CAS9 only	CAS9 + tbx5 exon5 sgRNA
Target Gene Assayed
aldh1a2	41/43 normal expression	23/61 reduced/absent
shh	26/26 normal expression	19/48 reduced/absent
dhh	13/14 normal expression	9/20 reduced/absent
wnt2b	21/25 normal expression	12/21 reduced/absent
nkx2-1	19/22 normal expression	14/42 absent
total	120/130 normal (~92.3%)	77/192 (~40.1%)
		with gene expression defects
