# Supplementary material for: Tbx5 drives Aldh1a2 expression to regulate a RA-Hedgehog-Wnt gene regulatory network coordinating cardiopulmonary development
Source: eLife. 2021 Oct 13;10:e69288. doi: 10.7554/eLife.69288 (PMC8555986; doi:10.7554/eLife.69288)
Supplement: Figure 3—figure supplement 1—source data 1. — Exogenous WNT2B protein treatment rescues nkx2-1 expression in Tbx5-depleted Xenopus cardiopulmonary foregut explants. RT-qPCR analysis of Xenopus foregut cardiopulmonary explants treated ± recombinant Human WNT2B protein (100 ng/ml) 48 hr NF20–34. [file elife-69288-fig3-figsupp1-data1.xlsx]

## Sheet: Sheet1
fig3 supplement1_ RTqPCR analysis of Xenopus foregut cardiopulmonary explants treated +/- recombinant Human WNT2B protein (100ng/mL) 48 hours NF20-34
Sample	target	Ct		target	Ct		Delta Ct	dd Ct	relative expression (2^-ddCt)		t-test p-value	comparison
uninj untreated	odc	18.583		nkx2-1	24.007		5.424
uninj untreated	odc	18.692		nkx2-1	23.991		5.299
uninj untreated	odc	19.126		nkx2-1	23.929		4.803
mismatch MO + 0.2% BSA	odc	18.934		nkx2-1	24.309		5.375	-0.049	1.03455
mismatch MO + 0.2% BSA	odc	18.719		nkx2-1	24.176		5.457	0.158	0.896267
mismatch MO + 0.2% BSA	odc	18.943		nkx2-1	23.813		4.87	0.067	0.954621
mismatch MO + WNT2B 100ng/mL	odc	18.138		nkx2-1	19.12		0.982	#REF!	#REF!		#REF!	(vs mismatch MO + 0.2%BSA)
mismatch MO + WNT2B 100ng/mL	odc	18.002		nkx2-1	19.416		1.414	#REF!	#REF!
mismatch MO + WNT2B 100ng/mL	odc	18.094		nkx2-1	19.313		1.219	#REF!	#REF!
Tbx5 MO + 0.2% BSA	odc	18.322		nkx2-1	27.455		9.133	3.709	0.076468		0.000757491	(vs mismatch MO + 0.2%BSA)
Tbx5 MO + 0.2% BSA	odc	18.437		nkx2-1	27.313		8.876	3.577	0.0837945
Tbx5 MO + 0.2% BSA	odc	18.219		nkx2-1	27.687		9.468	4.665	0.039418
Tbx5 MO + WNT2B (100ng/mL)	odc	18.099		nkx2-1	19.299		1.2	#REF!	#REF!		#REF!	(vs Tbx5 MO + 0.2%BSA)
Tbx5 MO + WNT2B (100ng/mL)	odc	18.481		nkx2-1	18.906		0.425	#REF!	#REF!
Tbx5 MO + WNT2B (100ng/mL)	odc	18.132		nkx2-1	18.623		0.491	#REF!	#REF!
Sample	target	Ct		target	Ct		Delta Ct	dd Ct	2^-ddCt		t-test p-value	comparison
mismatch MO + 0.2% BSA	odc	18.934		shh	20.947		2.013	#REF!	#REF!
mismatch MO + 0.2% BSA	odc	18.719		shh	20.203		1.484	#REF!	#REF!
mismatch MO + 0.2% BSA	odc	18.943		shh	20.879		1.936	#REF!	#REF!
mismatch MO + WNT2B 100ng/mL	odc	18.138		shh	20.199		2.061	#REF!	#REF!		#REF!	(vs mismatch MO + 0.2%BSA)
mismatch MO + WNT2B 100ng/mL	odc	18.002		shh	20.003		2.001	#REF!	#REF!
mismatch MO + WNT2B 100ng/mL	odc	18.094		shh	19.786		1.692	#REF!	#REF!
Tbx5 MO + 0.2% BSA	odc	18.322		shh	23.274		4.952	#REF!	#REF!		#REF!	(vs mismatch MO + 0.2%BSA)
Tbx5 MO + 0.2% BSA	odc	18.437		shh	23.001		4.564	#REF!	#REF!
Tbx5 MO + 0.2% BSA	odc	18.219		shh	22.112		3.893	#REF!	#REF!
Tbx5 MO + WNT2B (100ng/mL)	odc	18.099		shh	22.799		4.7	#REF!	#REF!		#REF!	(vs Tbx5 MO + 0.2%BSA)
Tbx5 MO + WNT2B (100ng/mL)	odc	18.481		shh	22.586		4.105	#REF!	#REF!
Tbx5 MO + WNT2B (100ng/mL)	odc	18.132		shh	22.199		4.067	#REF!	#REF!
Sample	target	Ct		target	Ct		Delta Ct	dd Ct	2^-ddCt		t-test p-value	comparison
mismatch MO + 0.2% BSA	odc	18.934		dhh	21.899		2.965	#REF!	#REF!
mismatch MO + 0.2% BSA	odc	18.719		dhh	21.133		2.414	#REF!	#REF!
mismatch MO + 0.2% BSA	odc	18.943		dhh	21.007		2.064	#REF!	#REF!
mismatch MO + WNT2B 100ng/mL	odc	18.138		dhh	21.395		3.257	#REF!	#REF!		#REF!	(vs mismatch MO + 0.2%BSA)
mismatch MO + WNT2B 100ng/mL	odc	18.002		dhh	21.194		3.192	#REF!	#REF!
mismatch MO + WNT2B 100ng/mL	odc	18.094		dhh	21.113		3.019	#REF!	#REF!
Tbx5 MO + 0.2% BSA	odc	18.322		dhh	26.008		7.686	#REF!	#REF!		#REF!	(vs mismatch MO + 0.2%BSA)
Tbx5 MO + 0.2% BSA	odc	18.437		dhh	25.675		7.238	#REF!	#REF!
Tbx5 MO + 0.2% BSA	odc	18.219		dhh	26.134		7.915	#REF!	#REF!
Tbx5 MO + WNT2B (100ng/mL)	odc	18.099		dhh	30.067		11.968	#REF!	#REF!		#REF!	(vs Tbx5 MO + 0.2%BSA)
Tbx5 MO + WNT2B (100ng/mL)	odc	18.481		dhh	29.615		11.134	#REF!	#REF!
Tbx5 MO + WNT2B (100ng/mL)	odc	18.132		dhh	28.142		10.01	#REF!	#REF!
