# Supplementary material for: Tbx5 drives Aldh1a2 expression to regulate a RA-Hedgehog-Wnt gene regulatory network coordinating cardiopulmonary development
Source: eLife. 2021 Oct 13;10:e69288. doi: 10.7554/eLife.69288 (PMC8555986; doi:10.7554/eLife.69288)
Supplement: Figure 3—source data 1. — Xenopus explant RT-qPCR source data. Explants were dissected at NF20, cultured 48 hr±DMSO or 25 nM all-trans retinoic acid (RA); harvested at NF34; three biological replicates for each condition; n=4 pooled explants in each replicate; pooled explants came from 2 to 3 separate fertilization/injection experiments. [file elife-69288-fig3-data1.xlsx]

## Sheet: Sheet1
Fig3K Xenopus Foregut / Cardiopulmonary (CP) Explant RTqPCR source data
dissected NF20, cultured 48 hours +/- DMSO or 25nM all-trans Retinoic Acid (RA); harvested at NF34; 3 biological replicates for each condition; n=4 pooled explants in each replicate; pooled explants came from 2 to 3 separate fertilization/injection experiments
		GOI	Housekeeping
Sample		Ct aldh1a2	Ct odc	d Ct	ddCt	relative expression (2^-ddCt)	avg	t-test p value	comparison
uninj untreated	aldh1a2	23.155	18.207	5.404
uninj untreated	aldh1a2	23.611	18.334	4.83
uninj untreated	aldh1a2	23.164	18.106	5.058
cont MO DMSO	aldh1a2	23.082	19.028	4.528	-0.876	1.83528	1.72582
cont MO DMSO	aldh1a2	23.556	19.112	4.247	-0.583	1.49796
cont MO DMSO	aldh1a2	23.359	19.184	4.175	-0.883	1.84421
cont MO + RA 25nM	aldh1a2	23.813	18.317	5.362	-0.042	1.02954	0.874522	0.00522736	(vs cont MO DMSO)
cont MO + RA 25nM	aldh1a2	23.679	18.409	5.18	0.35	0.784584
cont MO + RA 25nM	aldh1a2	23.589	18.226	5.363	0.305	0.809442
Tbx5 MO + DMSO	aldh1a2	26.976	19.215	7.89	2.486	0.1785	0.225616	0.0042185	(vs cont MO DMSO)
Tbx5 MO + DMSO	aldh1a2	27.105	19.482	6.766	1.936	0.26134
Tbx5 MO + DMSO	aldh1a2	26.248	19.113	7.135	2.077	0.237007
Tbx5 MO + RA (25 nM)	aldh1a2	25.781	18.583	7.415	2.011	0.248101	0.489582	0.20666	(vs Tbx5 MO DMSO)
Tbx5 MO + RA (25 nM)	aldh1a2	25.998	18.692	5.911	1.081	0.472701
Tbx5 MO + RA (25 nM)	aldh1a2	24.603	19.126	5.477	0.419	0.747943
		GOI	Housekeeping
Sample		Ct gli1	Ct odc	d Ct	ddCt	2^-(ddCt)	avg	t-test p value	comparison
uninj untreated	gli1	23.994	18.583	4.928
uninj untreated	gli1	23.511	18.692	4.403
uninj untreated	gli1	23.095	19.126	3.969
cont MO DMSO	gli1	23.446	18.207	4.962	0.034	0.976709	0.952631
cont MO DMSO	gli1	23.169	18.334	4.198	-0.205	1.15269
cont MO DMSO	gli1	22.532	18.106	4.426	0.457	0.7285
cont MO + RA 25nM	gli1	22.279	19.028	3.163	-1.765	3.39874	3.35723	0.00311767	(vs cont MO DMSO)
cont MO + RA 25nM	gli1	22.191	19.112	2.495	-1.908	3.75288
cont MO + RA 25nM	gli1	21.607	19.184	2.423	-1.546	2.92006
Tbx5 MO + DMSO	gli1	26.752	18.317	8.435	3.507	0.0879605	0.0823252	0.0188515	(vs contMO DMSO)
Tbx5 MO + DMSO	gli1	26.291	18.409	7.78	3.377	0.0962546
Tbx5 MO + DMSO	gli1	26.189	18.226	7.963	3.994	0.0627605
Tbx5 MO + RA (25 nM)	gli1	22.977	19.215	3.762	-1.166	2.24389	2.1866	0.0249363	(vs Tbx5 MO DMSO)
Tbx5 MO + RA (25 nM)	gli1	23.776	19.482	2.947	-1.456	2.74347
Tbx5 MO + RA (25 nM)	gli1	22.429	19.113	3.316	-0.653	1.57243
		GOI	Housekeeping
Sample		Ct foxf1	Ct odc	d Ct	ddCt	2^-(ddCt)	avg	t-test p value	comparison
uninj untreated	foxf1	22.529	18.08	4.238
uninj untreated	foxf1	22.318	18.817	3.482
uninj untreated	foxf1	22.299	18.254	4.045
cont MO DMSO	foxf1	22.495	18.329	3.78	-0.458	1.37364	1.09176
cont MO DMSO	foxf1	22.109	18.457	3.768	0.286	0.820173
cont MO DMSO	foxf1	22.225	18.293	3.932	-0.113	1.08147
cont MO + RA 25nM	foxf1	20.061	19.156	0.567	-3.671	12.7374	9.16454	0.0562899	(vs cont MO DMSO)
cont MO + RA 25nM	foxf1	19.723	19.241	0.957	-2.525	5.75573
cont MO + RA 25nM	foxf1	20.198	19.323	0.875	-3.17	9.00047
Tbx5 MO + DMSO	foxf1	24.341	18.44	6.347	2.109	0.231808	0.195686	0.0283759	(vs cont MO DMSO)
Tbx5 MO + DMSO	foxf1	24.787	18.532	6.177	2.695	0.154427
Tbx5 MO + DMSO	foxf1	24.709	18.348	6.361	2.316	0.200823
Tbx5 MO + RA (25 nM)	foxf1	21.187	19.478	1.548	-2.69	6.45313	5.89646	0.00228774	(vs Tbx5 MO DMSO)
Tbx5 MO + RA (25 nM)	foxf1	21.026	19.624	1.008	-2.474	5.55582
Tbx5 MO + RA (25 nM)	foxf1	20.632	19.093	1.539	-2.506	5.68043
		GOI	Housekeeping
Sample		Ct osr1	Ct odc	d Ct	ddCt	2^-(ddCt)	avg	t-test p value	comparison
uninj untreated	osr1	22.354	18.08	4.274
uninj untreated	osr1	22.856	18.817	4.039
uninj untreated	osr1	22.704	18.254	4.45
cont MO DMSO	osr1	22.519	18.329	4.19	-0.084	1.05995	1.04766
cont MO DMSO	osr1	22.414	18.457	3.957	-0.082	1.05848
cont MO DMSO	osr1	22.708	18.293	4.415	-0.035	1.02456
cont MO + RA 25nM	osr1	20.462	19.156	1.306	-2.968	7.82451	6.99761	0.00588148	(vs cont MO DMSO)
cont MO + RA 25nM	osr1	20.487	19.241	1.246	-2.793	6.93069
cont MO + RA 25nM	osr1	21.132	19.323	1.809	-2.641	6.23764
Tbx5 MO + DMSO	osr1	24.743	18.44	6.303	2.029	0.245025	0.221004	1.13061e-05	(vs cont MO DMSO)
Tbx5 MO + DMSO	osr1	24.995	18.532	6.463	2.424	0.186339
Tbx5 MO + DMSO	osr1	24.908	18.348	6.56	2.11	0.231647
Tbx5 MO + RA (25 nM)	osr1	22.953	19.478	3.475	-0.799	1.73989	1.76427	9.2001e-07	(vs Tbx5 MO DMSO)
Tbx5 MO + RA (25 nM)	osr1	22.831	19.624	3.207	-0.832	1.78015
Tbx5 MO + RA (25 nM)	osr1	22.717	19.093	3.624	-0.826	1.77276
		GOI	Housekeeping
Sample		Ct wnt2b	Ct odc	d Ct	ddCt	2^-(ddCt)	avg	t-test p value	comparison
uninj untreated	wnt2b	24.306	18.583	5.723
uninj untreated	wnt2b	23.999	18.692	5.307
uninj untreated	wnt2b	24.271	19.126	5.145
cont MO DMSO	wnt2b	23.706	18.207	5.499	-0.224	1.16797	1.14424
cont MO DMSO	wnt2b	24.112	18.934	5.178	-0.129	1.09354
cont MO DMSO	wnt2b	23.662	18.745	4.917	-0.228	1.17121
cont MO + RA 25nM	wnt2b	21.997	19.028	2.969	-2.754	6.74585	5.7966	0.0126953	(vs cont MO DMSO)
cont MO + RA 25nM	wnt2b	22.125	19.112	3.013	-2.294	4.90414
cont MO + RA 25nM	wnt2b	21.808	19.184	2.624	-2.521	5.7398
Tbx5 MO + DMSO	wnt2b	29.443	18.317	11.126	5.403	0.0236339	0.0237459	0.000379232	(vs contMO DMSO)
Tbx5 MO + DMSO	wnt2b	29.622	18.409	11.213	5.906	0.016677
Tbx5 MO + DMSO	wnt2b	28.386	18.226	10.16	5.015	0.0309268
Tbx5 MO + RA (25 nM)	wnt2b	27.676	19.215	8.461	2.738	0.149892	0.0941625	0.126684	(vs Tbx5 MO DMSO)
Tbx5 MO + RA (25 nM)	wnt2b	28.559	19.482	9.077	3.77	0.0733022
Tbx5 MO + RA (25 nM)	wnt2b	28.334	19.113	9.221	4.076	0.0592928
		GOI	Housekeeping
Sample		Ct nkx2-1	Ct odc	d Ct	ddCt	2^-(ddCt)	avg	t-test p value	comparison
uninj untreated	nkx2-1	24.007	18.583	5.424
uninj untreated	nkx2-1	23.991	18.692	5.299
uninj untreated	nkx2-1	23.929	19.126	4.803
cont MO DMSO	nkx2-1	23.116	18.207	4.909	-0.515	1.42899	1.2436
cont MO DMSO	nkx2-1	23.302	18.334	4.968	-0.331	1.25788
cont MO DMSO	nkx2-1	22.847	18.106	4.741	-0.062	1.04391
cont MO + RA 25nM	nkx2-1	22.095	19.028	3.067	-2.357	5.12304	5.10284	0.00102618	(vs cont MO DMSO)
cont MO + RA 25nM	nkx2-1	21.948	19.112	2.836	-2.463	5.51362
cont MO + RA 25nM	nkx2-1	21.763	19.184	2.579	-2.224	4.67187
Tbx5 MO + DMSO	nkx2-1	28.027	18.317	9.71	4.286	0.0512608	0.0264927	0.00763877	(vs cont MO DMSO)
Tbx5 MO + DMSO	nkx2-1	29.335	18.409	10.926	5.627	0.020235
Tbx5 MO + DMSO	nkx2-1	29.998	18.226	11.772	6.969	0.00798219
Tbx5 MO + RA (25 nM)	nkx2-1	29.112	19.215	9.897	4.473	0.0450291	0.0329304	0.691299	(vs Tbx5 MO DMSO)
Tbx5 MO + RA (25 nM)	nkx2-1	29.667	19.482	10.185	4.886	0.0338195
Tbx5 MO + RA (25 nM)	nkx2-1	29.564	19.113	10.451	5.648	0.0199426
		GOI	Housekeeping
Sample		Ct shh	Ct odc	d Ct	ddCt	2^-(ddCt)	avg	t-test p value	comparison
uninj untreated	shh	20.772	18.583	2.189
uninj untreated	shh	20.313	18.692	1.621
uninj untreated	shh	20.907	19.126	1.781
cont MO DMSO	shh	20.143	18.207	1.936	-0.253	1.19168	1.00986
cont MO DMSO	shh	20.063	18.334	1.729	0.108	0.927873
cont MO DMSO	shh	20.023	18.106	1.917	0.136	0.910039
cont MO + RA 25nM	shh	19.421	19.028	0.393	-1.796	3.47256	2.63483	0.0591317	(vs cont MO DMSO)
cont MO + RA 25nM	shh	19.722	19.112	0.61	-1.011	2.01531
cont MO + RA 25nM	shh	19.692	19.184	0.508	-1.273	2.41664
Tbx5 MO + DMSO	shh	22.739	18.317	4.422	2.233	0.212716	0.360646	0.00590235	(vs cont MO DMSO)
Tbx5 MO + DMSO	shh	21.162	18.409	2.753	1.132	0.456283
Tbx5 MO + DMSO	shh	21.283	18.226	3.057	1.276	0.412939
Tbx5 MO + RA (25 nM)	shh	19.981	19.215	0.766	-1.423	2.68143	3.23148	0.00602551	(vs Tbx5 MO DMSO)
Tbx5 MO + RA (25 nM)	shh	19.283	19.482	-0.199	-1.82	3.53081
Tbx5 MO + RA (25 nM)	shh	19.094	19.113	-0.019	-1.8	3.4822
		GOI	Housekeeping
Sample		Ct dhh	Ct odc	d Ct	ddCt	2^-(ddCt)	avg	t-test p value	comparison
uninj untreated	dhh	21.773	18.583	3.19
uninj untreated	dhh	21.238	18.692	2.546
uninj untreated	dhh	21.099	19.126	1.973
cont MO DMSO	dhh	21.341	18.207	3.134	-0.056	1.03958	0.998738
cont MO DMSO	dhh	21.063	18.681	2.382	-0.164	1.12039
cont MO DMSO	dhh	21.137	18.906	2.231	0.258	0.836246
cont MO + RA 25nM	dhh	20.358	19.028	1.33	-1.86	3.63008	3.00146	0.0194714	(vs cont MO DMSO)
cont MO + RA 25nM	dhh	20.301	19.112	1.189	-1.357	2.56152
cont MO + RA 25nM	dhh	19.665	19.184	0.481	-1.492	2.81279
Tbx5 MO + DMSO	dhh	25.012	18.317	6.695	3.505	0.0880825	0.0807554	0.00644977	(vs cont MO DMSO)
Tbx5 MO + DMSO	dhh	24.173	18.409	5.764	3.218	0.10747
Tbx5 MO + DMSO	dhh	24.619	18.226	6.393	4.42	0.046714
Tbx5 MO + RA (25 nM)	dhh	20.871	19.215	1.656	-1.534	2.89588	3.70173	0.079972	(vs Tbx5 MO DMSO)
Tbx5 MO + RA (25 nM)	dhh	19.477	19.482	-0.005	-2.551	5.8604
Tbx5 MO + RA (25 nM)	dhh	19.854	19.113	0.741	-1.232	2.34892
		GOI	Housekeeping
Sample		Ct fgf8	Ct odc	d Ct	ddCt	2^-(ddCt)	avg	t-test p value	comparison
uninj untreated	fgf8	25.185	18.583	6.602
uninj untreated	fgf8	25.056	18.692	6.364
uninj untreated	fgf8	24.864	19.126	5.738
cont MO DMSO	fgf8	24.658	18.207	6.451	-0.151	1.11034	0.952019
cont MO DMSO	fgf8	25.364	18.681	6.683	0.319	0.801625
cont MO DMSO	fgf8	24.727	18.906	5.821	0.083	0.944092
cont MO + RA 25nM	fgf8	30.009	19.028	10.981	4.379	0.0480607	0.0417368	0.00913838	(vs cont MO DMSO)
cont MO + RA 25nM	fgf8	29.815	19.112	10.703	4.339	0.0494118
cont MO + RA 25nM	fgf8	30.094	19.184	10.91	5.172	0.0277379
Tbx5 MO + DMSO	fgf8	21.643	18.317	3.326	-3.276	9.68666	8.23118	0.0227951	(vs cont MO DMSO)
Tbx5 MO + DMSO	fgf8	21.602	18.409	3.193	-3.171	9.00671
Tbx5 MO + DMSO	fgf8	21.379	18.226	3.153	-2.585	6.00016
Tbx5 MO + RA (25 nM)	fgf8	29.748	19.215	10.533	3.931	0.0655618	0.0537728	0.0186335	(vs Tbx5 MO DMSO)
Tbx5 MO + RA (25 nM)	fgf8	29.612	19.482	10.13	3.766	0.0735057
Tbx5 MO + RA (25 nM)	fgf8	30.341	19.113	11.228	5.49	0.0222508
		GOI	Housekeeping
Sample		Ct fgf10	Ct odc	d Ct	ddCt	2^-(ddCt)	avg	t-test p value	comparison
uninj untreated	fgf10	24.399	18.583	5.816
uninj untreated	fgf10	24.727	18.692	6.035
uninj untreated	fgf10	24.185	19.126	5.059
cont MO DMSO	fgf10	24.839	18.977	5.862	0.046	0.968618	1.0835
cont MO DMSO	fgf10	24.968	19.375	5.593	-0.442	1.35849
cont MO DMSO	fgf10	24.063	18.889	5.174	0.115	0.923382
cont MO + RA 25nM	fgf10	27.149	19.028	8.121	2.305	0.202361	0.142749	0.0170093	(vs cont MO DMSO)
cont MO + RA 25nM	fgf10	28.105	19.112	8.993	2.958	0.128693
cont MO + RA 25nM	fgf10	27.606	19.184	8.422	3.363	0.0971933
Tbx5 MO + DMSO	fgf10	21.074	18.317	2.757	-3.059	8.33395	7.32604	0.0155804	(vs cont MO DMSO)
Tbx5 MO + DMSO	fgf10	21.447	18.409	3.038	-2.997	7.98338
Tbx5 MO + DMSO	fgf10	20.784	18.226	2.558	-2.501	5.66078
Tbx5 MO + RA (25 nM)	fgf10	27.903	19.215	8.688	2.872	0.136597	0.177698	0.0134119	(vs Tbx5 MO DMSO)
Tbx5 MO + RA (25 nM)	fgf10	28.122	19.482	8.64	2.605	0.164368
Tbx5 MO + RA (25 nM)	fgf10	26.279	19.113	7.166	2.107	0.232129
		GOI	Housekeeping
Sample		Ct spry2	Ct odc	d Ct	ddCt	2^-(ddCt)	avg	t-test p value	comparison
uninj untreated	sprouty2	26.742	18.583	8.159
uninj untreated	sprouty2	26.933	18.692	8.241
uninj untreated	sprouty2	27.297	19.126	8.171
cont MO DMSO	sprouty2	26.231	18.207	8.024	-0.135	1.09809	0.953565
cont MO DMSO	sprouty2	26.782	18.334	8.448	0.207	0.866337
cont MO DMSO	sprouty2	26.435	18.106	8.329	0.158	0.896267
cont MO + RA 25nM	sprouty2	29.014	19.028	9.986	1.827	0.28185	0.233424	0.00248158	(vs cont MO DMSO)
cont MO + RA 25nM	sprouty2	30.118	19.112	11.006	2.765	0.147113
cont MO + RA 25nM	sprouty2	29.237	19.184	10.053	1.882	0.271307
Tbx5 MO + DMSO	sprouty2	23.483	18.317	5.166	-2.993	7.96128	7.63412	0.0033755	(vs cont MO DMSO)
Tbx5 MO + DMSO	sprouty2	23.621	18.409	5.212	-3.029	8.16244
Tbx5 MO + DMSO	sprouty2	23.636	18.226	5.41	-2.761	6.77866
Tbx5 MO + RA (25 nM)	sprouty2	31.093	19.215	11.878	3.719	0.0759398	0.116481	0.00320425	(vs Tbx5 MO DMSO)
Tbx5 MO + RA (25 nM)	sprouty2	30.385	19.482	10.903	2.662	0.158
Tbx5 MO + RA (25 nM)	sprouty2	30.398	19.113	11.285	3.114	0.115503
		GOI	Housekeeping
Sample		Ct tbx1	Ct odc	d Ct	ddCt	2^-(ddCt)	avg	t-test p value	comparison
uninj untreated	tbx1	26.318	18.583	7.735
uninj untreated	tbx1	25.725	18.692	7.033
uninj untreated	tbx1	25.999	19.126	6.873
cont MO DMSO	tbx1	26.899	18.977	7.922	0.187	0.87843	0.985601
cont MO DMSO	tbx1	26.132	19.375	6.757	-0.276	1.21083
cont MO DMSO	tbx1	25.967	18.889	7.078	0.205	0.867539
cont MO + RA 25nM	tbx1	29.415	19.028	10.387	2.652	0.159099	0.120023	0.0142772	(vs cont MO DMSO)
cont MO + RA 25nM	tbx1	29.339	19.112	10.227	3.194	0.109272
cont MO + RA 25nM	tbx1	29.504	19.184	10.32	3.447	0.0916958
Tbx5 MO + DMSO	tbx1	23.051	18.317	4.734	-3.001	8.00555	6.59539	0.025707	(vs cont MO DMSO)
Tbx5 MO + DMSO	tbx1	23.177	18.409	4.768	-2.265	4.80654
Tbx5 MO + DMSO	tbx1	22.297	18.226	4.071	-2.802	6.97407
Tbx5 MO + RA (25 nM)	tbx1	28.893	19.215	9.678	1.943	0.260075	0.171714	0.0206397	(vs Tbx5 MO DMSO)
Tbx5 MO + RA (25 nM)	tbx1	29.169	19.482	9.687	2.654	0.158879
Tbx5 MO + RA (25 nM)	tbx1	29.364	19.113	10.251	3.378	0.096188
		GOI	Housekeeping
Sample		Ct cyp26a1	Ct odc	d Ct	ddCt	2^-(ddCt)	avg	t-test p value	comparison
uninj untreated	cyp26a1	25.109	18.583	6.526
uninj untreated	cyp26a1	24.687	18.692	5.995
uninj untreated	cyp26a1	25.832	19.126	6.706
cont MO DMSO	cyp26a1	25.629	18.977	6.652	0.126	0.916369	1.02217
cont MO DMSO	cyp26a1	25.445	19.375	6.07	0.075	0.949342
cont MO DMSO	cyp26a1	25.331	18.889	6.442	-0.264	1.2008
cont MO + RA 25nM	cyp26a1	24.797	19.028	5.769	-0.757	1.68997	1.8846	0.00732804	(vs cont MO DMSO)
cont MO + RA 25nM	cyp26a1	24.018	19.112	4.906	-1.089	2.12727
cont MO + RA 25nM	cyp26a1	25.013	19.184	5.829	-0.877	1.83655
Tbx5 MO + DMSO	cyp26a1	20.482	18.317	2.165	-4.361	20.5491	17.2553	0.0165929	(vs cont MO DMSO)
Tbx5 MO + DMSO	cyp26a1	20.239	18.409	1.83	-4.165	17.9387
Tbx5 MO + DMSO	cyp26a1	21.201	18.226	2.975	-3.731	13.2783
Tbx5 MO + RA (25 nM)	cyp26a1	28.887	19.215	9.672	3.146	0.112969	0.173772	0.0151293	(vs Tbx5 MO DMSO)
Tbx5 MO + RA (25 nM)	cyp26a1	27.933	19.482	8.451	2.456	0.182251
Tbx5 MO + RA (25 nM)	cyp26a1	27.964	19.113	8.851	2.145	0.226095
		GOI	Housekeeping
Sample		Ct dhrs3	Ct odc	d Ct	ddCt	2^-(ddCt)	avg	t-test p value	comparison
uninj untreated	dhrs3	24.417	18.583	5.834
uninj untreated	dhrs3	24.205	18.692	5.513
uninj untreated	dhrs3	24.173	19.126	5.047
cont MO DMSO	dhrs3	23.788	18.207	5.581	-0.253	1.19168	1.06235
cont MO DMSO	dhrs3	23.739	18.334	5.405	-0.108	1.07773
cont MO DMSO	dhrs3	23.277	18.106	5.171	0.124	0.91764
cont MO + RA 25nM	dhrs3	24.635	19.028	5.607	-0.227	1.1704	1.30053	0.0871504	(vs cont MO DMSO)
cont MO + RA 25nM	dhrs3	24.215	19.112	5.103	-0.41	1.32869
cont MO + RA 25nM	dhrs3	23.743	19.184	4.559	-0.488	1.4025
Tbx5 MO + DMSO	dhrs3	22.236	18.317	3.919	-1.915	3.77114	3.69966	0.0102628	(vs cont MO DMSO)
Tbx5 MO + DMSO	dhrs3	22.279	18.409	3.87	-1.643	3.12315
Tbx5 MO + DMSO	dhrs3	21.201	18.226	2.975	-2.072	4.20469
Tbx5 MO + RA (25 nM)	dhrs3	25.609	19.215	6.394	0.56	0.678302	0.631382	0.00879131	(vs Tbx5 MO DMSO)
Tbx5 MO + RA (25 nM)	dhrs3	25.526	19.482	6.044	0.531	0.692075
Tbx5 MO + RA (25 nM)	dhrs3	25.093	19.113	5.98	0.933	0.523768
		GOI	Housekeeping
Sample		Ct hand1	Ct odc	d Ct	ddCt	2^-(ddCt)	avg	t-test p value	comparison
uninj untreated	hand1	25.376	18.583	6.793
uninj untreated	hand1	25.489	18.692	6.797
uninj untreated	hand1	25.363	19.126	6.237
cont MO DMSO	hand1	25.128	18.207	6.921	0.128	0.915099	0.984084
cont MO DMSO	hand1	25.065	18.334	6.731	-0.066	1.04681
cont MO DMSO	hand1	24.357	18.106	6.251	0.014	0.990343
cont MO + RA 25nM	hand1	28.107	19.028	9.079	2.286	0.205043	0.167468	0.000102935	(vs cont MO DMSO)
cont MO + RA 25nM	hand1	28.299	19.112	9.187	2.39	0.190782
cont MO + RA 25nM	hand1	28.651	19.184	9.467	3.23	0.106579
Tbx5 MO + DMSO	hand1	23.441	18.317	5.124	-1.669	3.17994	4.26846	0.0339207	(vs cont MO DMSO)
Tbx5 MO + DMSO	hand1	23.108	18.409	4.699	-2.098	4.28115
Tbx5 MO + DMSO	hand1	22.045	18.226	3.819	-2.418	5.3443
Tbx5 MO + RA (25 nM)	hand1	26.982	19.215	7.767	0.974	0.509093	0.44401	0.0236249	(vs Tbx5 MO DMSO)
Tbx5 MO + RA (25 nM)	hand1	27.11	19.482	7.628	0.831	0.562139
Tbx5 MO + RA (25 nM)	hand1	27.289	19.113	8.176	1.939	0.260797
		GOI	Housekeeping
Sample		Ct hand2	Ct odc	d Ct	ddCt	2^-(ddCt)	avg	t-test p value	comparison
uninj untreated	hand2	24.997	18.583	6.414
uninj untreated	hand2	25.362	18.692	6.67
uninj untreated	hand2	25.275	19.126	6.149
cont MO DMSO	hand2	24.898	18.207	6.691	0.277	0.825305	0.923315
cont MO DMSO	hand2	25.047	18.334	6.713	0.043	0.970634
cont MO DMSO	hand2	24.293	18.106	6.187	0.038	0.974004
cont MO + RA 25nM	hand2	29.081	19.028	10.053	3.639	0.0802697	0.115977	0.000686629	(vs cont MO DMSO)
cont MO + RA 25nM	hand2	28.379	19.112	9.267	2.597	0.165282
cont MO + RA 25nM	hand2	28.621	19.184	9.437	3.288	0.10238
Tbx5 MO + DMSO	hand2	22.265	18.317	3.948	-2.466	5.5251	6.58902	0.0133068	(vs cont MO DMSO)
Tbx5 MO + DMSO	hand2	22.111	18.409	3.702	-2.968	7.82451
Tbx5 MO + DMSO	hand2	21.693	18.226	3.467	-2.682	6.41745
Tbx5 MO + RA (25 nM)	hand2	26.076	19.215	6.861	0.447	0.733567	0.46977	0.00890283	(vs Tbx5 MO DMSO)
Tbx5 MO + RA (25 nM)	hand2	27.204	19.482	7.722	1.052	0.482299
Tbx5 MO + RA (25 nM)	hand2	27.632	19.113	8.519	2.37	0.193446
		GOI	Housekeeping
Sample		Ct tgfbR2	Ct odc	d Ct	ddCt	2^-(ddCt)	avg	t-test p value	comparison
uninj untreated	tgfbR2	25.086	18.583	6.503
uninj untreated	tgfbR2	25.072	18.692	6.38
uninj untreated	tgfbR2	25.869	19.126	6.743
cont MO DMSO	tgfbR2	24.716	18.207	6.509	0.006	0.99585	1.05929
cont MO DMSO	tgfbR2	24.809	18.334	6.475	0.095	0.936272
cont MO DMSO	tgfbR2	24.532	18.106	6.426	-0.317	1.24574
cont MO + RA 25nM	tgfbR2	28.153	19.028	9.125	2.622	0.162442	0.151367	0.00687232	(vs cont MO DMSO)
cont MO + RA 25nM	tgfbR2	28.836	19.112	9.724	3.344	0.0984817
cont MO + RA 25nM	tgfbR2	28.299	19.184	9.115	2.372	0.193178
Tbx5 MO + DMSO	tgfbR2	22.763	18.317	4.446	-2.057	4.1612	4.95892	0.0151032	(vs cont MO DMSO)
Tbx5 MO + DMSO	tgfbR2	22.534	18.409	4.125	-2.255	4.77334
Tbx5 MO + DMSO	tgfbR2	22.398	18.226	4.172	-2.571	5.94221
Tbx5 MO + RA (25 nM)	tgfbR2	25.182	19.215	5.967	-0.536	1.44995	1.67975	0.0153156	(vs Tbx5 MO DMSO)
Tbx5 MO + RA (25 nM)	tgfbR2	25.255	19.482	5.773	-0.607	1.52309
Tbx5 MO + RA (25 nM)	tgfbR2	24.809	19.113	5.696	-1.047	2.06623
		GOI	Housekeeping
Sample		Ct tgfbi	Ct odc	d Ct	ddCt	2^-(ddCt)	avg	t-test p value	comparison
uninj untreated	tgfbi	25.813	18.583	7.23
uninj untreated	tgfbi	26.284	18.692	7.592
uninj untreated	tgfbi	26.191	19.126	7.065
cont MO DMSO	tgfbi	25.801	18.207	7.594	0.364	0.777007	0.896067
cont MO DMSO	tgfbi	25.955	18.334	7.621	0.029	0.980099
cont MO DMSO	tgfbi	25.274	18.106	7.168	0.103	0.931095
cont MO + RA 25nM	tgfbi	29.451	19.028	10.423	3.193	0.109348	0.172328	0.00161882	(vs cont MO DMSO)
cont MO + RA 25nM	tgfbi	28.379	19.112	9.267	1.675	0.313166
cont MO + RA 25nM	tgfbi	29.653	19.184	10.469	3.404	0.09447
Tbx5 MO + DMSO	tgfbi	23.646	18.317	5.329	-1.901	3.73472	3.73825	0.00288922	(vs cont MO DMSO)
Tbx5 MO + DMSO	tgfbi	23.967	18.409	5.558	-2.034	4.09539
Tbx5 MO + DMSO	tgfbi	23.532	18.226	5.306	-1.759	3.38463
Tbx5 MO + RA (25 nM)	tgfbi	26.855	19.215	7.64	0.41	0.752623	0.574125	0.000726356	(vs Tbx5 MO DMSO)
Tbx5 MO + RA (25 nM)	tgfbi	27.799	19.482	8.317	0.725	0.604997
Tbx5 MO + RA (25 nM)	tgfbi	27.633	19.113	8.52	1.455	0.364755
