# Supplementary material for: Tbx5 drives Aldh1a2 expression to regulate a RA-Hedgehog-Wnt gene regulatory network coordinating cardiopulmonary development
Source: eLife. 2021 Oct 13;10:e69288. doi: 10.7554/eLife.69288 (PMC8555986; doi:10.7554/eLife.69288)
Supplement: Figure 4—figure supplement 1—source data 1. [file elife-69288-fig4-figsupp1-data1.xlsx]

## Sheet: Sheet1
figure4_supplement1_source_data_ RTqPCR analysis of Xenopus anterior (AME) or posterior (PME) mesendoderm explants injected with GR-Tbx5 RNA and treated +/- DEX, CHX, or DEAB; analyzed after 8 hours
(EtOH is the vechicle DEX is dissolved in; DMSO is vehicle DEAB is dissolved in)
Sample	Target	Ct		Target	Ct		d Ct	dd Ct	relative expression (2^-ddCt)		t-test p-value	comparison
AME unij untreated	ODC	19.917		fgf8	25.476		5.559	0	1
AME unij untreated	ODC	19.788		fgf8	25.299		5.511	0	1
AME unij untreated	ODC	19.224		fgf8	24.803		5.579	0	1
AME + vehicle (DMSO) + Dex	ODC	19.773		fgf8	25.198		5.425	-0.134	1.09733
AME + vehicle (DMSO) + Dex	ODC	19.655		fgf8	25.162		5.507	-0.004	1.00278
AME + vehicle (DMSO) + Dex	ODC	19.009		fgf8	24.218		5.209	-0.37	1.29235
AME +EtOH + GR-Tbx5 no DEX	ODC	19.741		fgf8	25.414		5.673	0.114	0.924023
AME +EtOH + GR-Tbx5 no DEX	ODC	19.832		fgf8	25.475		5.643	0.132	0.912565
AME +EtOH + GR-Tbx5 no DEX	ODC	19.128		fgf8	24.672		5.544	-0.035	1.02456
AME+ DMSO + GR-Tbx5 + DEX	ODC	19.747		fgf8	28.672		8.925	3.366	0.0969914		0.000719707	(vs AME +EtOH + GR-Tbx5 no DEX)
AME+ DMSO + GR-Tbx5 + DEX	ODC	19.326		fgf8	27.769		8.443	2.932	0.131033
AME+ DMSO + GR-Tbx5 + DEX	ODC	19.504		fgf8	28.463		8.959	3.38	0.0960547
AME + DMSO + GR-Tbx5 + CHX + DEX	ODC	19.896		fgf8	24.739		4.843	-0.716	1.64262		0.00665272	(vs AME+ DMSO + GR-Tbx5 + DEX)
AME + DMSO + GR-Tbx5 + CHX + DEX	ODC	19.779		fgf8	24.687		4.908	-0.603	1.51887
AME + DMSO + GR-Tbx5 + CHX + DEX	ODC	19.863		fgf8	25.118		5.255	-0.324	1.2518
AME + DEAB + GR-Tbx5 + DEX	ODC	19.323		fgf8	23.292		3.969	-1.59	3.01049		0.000360318	(vs AME+ DMSO + GR-Tbx5 + DEX)
AME + DEAB + GR-Tbx5 + DEX	ODC	19.499		fgf8	23.525		4.026	-1.485	2.79917
AME + DEAB + GR-Tbx5 + DEX	ODC	19.178		fgf8	23.189		4.011	-1.568	2.96493
AME+ DMSO+ GR-Tbx5 No Dex + CHX	ODC	19.178		fgf8	24.119		4.941	-0.618	1.53475
AME+ DMSO+ GR-Tbx5 No Dex + CHX	ODC	19.249		fgf8	24.005		4.756	-0.755	1.68763
AME+ DMSO+ GR-Tbx5 No Dex + CHX	ODC	19.529		fgf8	24.142		4.613	-0.966	1.95342
AME + DEAB + EtOH	ODC	19.382		fgf8	23.031		3.649	-1.91	3.75809
AME + DEAB + EtOH	ODC	19.419		fgf8	23.306		3.887	-1.624	3.08228
AME + DEAB + EtOH	ODC	19.776		fgf8	24.056		4.28	-1.299	2.46058
Sample	Target	Ct		Target	Ct		d Ct	dd Ct	2^-ddCt		t-test p-value	comparison
PME unij untreated	ODC	20.072		fgf8	24.821		4.749	0
PME unij untreated	ODC	20.368		fgf8	24.389		4.021	0
PME unij untreated	ODC	20.707		fgf8	25.215		4.508	0
PME + vehicle (DMSO) + Dex	ODC	20.133		fgf8	24.864		4.731	-0.018	1.01255
PME + vehicle (DMSO) + Dex	ODC	20.294		fgf8	24.276		3.982	-0.039	1.0274
PME + vehicle (DMSO) + Dex	ODC	20.553		fgf8	24.719		4.166	-0.342	1.26751
PME + EtOH + GR-Tbx5 No DEX	ODC	20.119		fgf8	25.139		5.02	0.271	0.828745
PME + EtOH + GR-Tbx5 No DEX	ODC	20.799		fgf8	24.668		3.869	-0.152	1.11111
PME + EtOH + GR-Tbx5 No DEX	ODC	20.268		fgf8	24.899		4.631	0.123	0.918276
PME + DMSO + GR-Tbx5 + Dex	ODC	20.202		fgf8	29.091		8.889	4.14	0.0567199		0.00833254	(vs PME +EtOH + GR-Tbx5 no DEX)
PME + DMSO + GR-Tbx5 + Dex	ODC	20.619		fgf8	28.21		7.591	3.57	0.0842021
PME + DMSO + GR-Tbx5 + Dex	ODC	20.263		fgf8	28.412		8.149	3.641	0.0801585
PME + DMSO + GR-Tbx5 + CHX + DEX	ODC	20.435		fgf8	24.507		4.072	-0.677	1.59881		0.0090904	(vs PME + DMSO + GR-Tbx5 + DEX)
PME + DMSO + GR-Tbx5 + CHX + DEX	ODC	20.162		fgf8	23.1078		2.9458	-1.0752	2.10701
PME + DMSO + GR-Tbx5 + CHX + DEX	ODC	20.336		fgf8	23.721		3.385	-1.123	2.17799
PME + DEAB + GR-Tbx5 + DEX	ODC	20.957		fgf8	25.112		4.155	-0.594	1.50943		0.0186579	(vs PME + DMSO + GR-Tbx5 + DEX)
PME + DEAB + GR-Tbx5 + DEX	ODC	20.702		fgf8	24.489		3.787	-0.234	1.17609
PME + DEAB + GR-Tbx5 + DEX	ODC	20.635		fgf8	24.238		3.603	-0.905	1.87254
PME + DMSO + GR-Tbx5 No Dex + CHX	ODC	20.723		fgf8	24.273		3.55	-1.199	2.2958
PME + DMSO + GR-Tbx5 No Dex + CHX	ODC	20.899		fgf8	24.251		3.352	-0.669	1.58997
PME + DMSO + GR-Tbx5 No Dex + CHX	ODC	20.376		fgf8	23.794		3.418	-1.09	2.12874
PME + DEAB + EtOH	ODC	20.101		fgf8	23.323		3.222	-1.527	2.88186
PME + DEAB + EtOH	ODC	20.376		fgf8	22.759		2.383	-1.638	3.11234
PME + DEAB + EtOH	ODC	20.423		fgf8	23.627		3.204	-1.304	2.46913
