# Supplementary material for: Tbx5 drives Aldh1a2 expression to regulate a RA-Hedgehog-Wnt gene regulatory network coordinating cardiopulmonary development
Source: eLife. 2021 Oct 13;10:e69288. doi: 10.7554/eLife.69288 (PMC8555986; doi:10.7554/eLife.69288)
Supplement: Figure 4—figure supplement 1—source data 2. [file elife-69288-fig4-figsupp1-data2.xlsx]

## Sheet: Sheet1
source Data for figure 4 supplement1 F,G,H,I : spatio-tempforal comparison of Enh1 reporter activity (fg vs hg NF25, NF34)
Sample	Firefly	Renilla	Firefly / Renilla	avg	std dev	t test p-value	comparison
trop Enh1 WT foregut injection assayed NF25	874044	15286	57.1794	49.8471	9.04932	5.7896e-05	(vs trop Enh1 WT hg NF25)
trop Enh1 WT foregut injection assayed NF25	692921	13618	50.8827
trop Enh1 WT foregut injection assayed NF25	902795	14989	60.2305
trop Enh1 WT foregut injection assayed NF25	634959	18498	34.3258
trop Enh1 WT foregut injection assayed NF25	723447	15182	47.6516
trop Enh1 WT foregut injection assayed NF25	693186	14201	48.8125
trop Enh1 WT hindgut injection assayed NF25	89506	16985	5.26971	4.47684	0.829562
trop Enh1 WT hindgut injection assayed NF25	64882	18002	3.60416
trop Enh1 WT hindgut injection assayed NF25	70467	16783	4.19871
trop Enh1 WT hindgut injection assayed NF25	68364	14297	4.7817
trop Enh1 WT hindgut injection assayed NF25	71385	13044	5.47263
trop Enh1 WT hindgut injection assayed NF25	58447	16538	3.5341
Sample	Firefly	Renilla	Firefly / Renilla	avg	std dev	t test p-value	comparison
trop Enh1 WT foregut injection assayed NF34	3302499	18713	176.482	197.65	17.4136	3.16328e-07	(vs trop Enh1 WT hg NF34)
trop Enh1 WT foregut injection assayed NF34	2790116	15100	184.776
trop Enh1 WT foregut injection assayed NF34	3284462	16974	193.5
trop Enh1 WT foregut injection assayed NF34	3662207	18743	195.391
trop Enh1 WT foregut injection assayed NF34	3711932	16613	223.435
trop Enh1 WT foregut injection assayed NF34	3817238	17979	212.316
trop Enh1 WT hindgut injection assayed NF34	192881	19323	9.98194	9.30602	5.14866
trop Enh1 WT hindgut injection assayed NF34	304742	16014	19.0297
trop Enh1 WT hindgut injection assayed NF34	162883	17628	9.24002
trop Enh1 WT hindgut injection assayed NF34	87103	15902	5.47749
trop Enh1 WT hindgut injection assayed NF34	123996	17765	6.97979
trop Enh1 WT hindgut injection assayed NF34	101549	19806	5.12718
Sample	Firefly	Renilla	Firefly / Renilla	avg	std dev	t test p-value	comparison
mouse Enh1 WT foregut injection assayed NF25	982186	15623	62.868	56.0912	12.443	0.000133051	(vs mouse Enh1 WT hg NF25)
mouse Enh1 WT foregut injection assayed NF25	672689	17184	39.1462
mouse Enh1 WT foregut injection assayed NF25	583913	12236	47.7209
mouse Enh1 WT foregut injection assayed NF25	1023517	15102	67.7736
mouse Enh1 WT foregut injection assayed NF25	862361	17511	49.2468
mouse Enh1 WT foregut injection assayed NF25	875116	12539	69.7915
mouse Enh1 WT hindgut injection assayed NF25	53101	16738	3.17248	4.01452	1.50167
mouse Enh1 WT hindgut injection assayed NF25	37265	17051	2.1855
mouse Enh1 WT hindgut injection assayed NF25	68298	15533	4.39696
mouse Enh1 WT hindgut injection assayed NF25	63876	17936	3.56133
mouse Enh1 WT hindgut injection assayed NF25	79113	19117	4.13836
mouse Enh1 WT hindgut injection assayed NF25	102399	15439	6.63249
Sample	Firefly	Renilla	Firefly / Renilla	avg	std dev	t test p-value	comparison
mouse Enh1 WT foregut injection assayed NF34	3623146	16663	217.437	230.714	36.9893	2.32002e-05	(vs mouse Enh1 WT NF34)
mouse Enh1 WT foregut injection assayed NF34	4102556	17397	235.82
mouse Enh1 WT foregut injection assayed NF34	2528549	15282	165.459
mouse Enh1 WT foregut injection assayed NF34	5128492	18911	271.191
mouse Enh1 WT foregut injection assayed NF34	3995761	16845	237.208
mouse Enh1 WT foregut injection assayed NF34	4658902	18116	257.171
mouse Enh1 WT hindgut injection assayed NF34	281711	18704	15.0615	9.52674	3.99553
mouse Enh1 WT hindgut injection assayed NF34	164998	14658	11.2565
mouse Enh1 WT hindgut injection assayed NF34	134275	18223	7.36844
mouse Enh1 WT hindgut injection assayed NF34	109790	18956	5.79183
mouse Enh1 WT hindgut injection assayed NF34	87119	16783	5.19091
mouse Enh1 WT hindgut injection assayed NF34	225341	18040	12.4912
Data for fig4 supplement 1 H,I: mutation of single, highly conserved Tbx motif in Ehh1
Sample	Firefly	Renilla	Firefly / Renilla	avg	std dev
trop Enh1 WT foregut injection assayed NF34	543627	2172	250.289	263.633	70.5395
trop Enh1 WT foregut injection assayed NF34	601998	1955	307.927
trop Enh1 WT foregut injection assayed NF34	498285	2148	231.976
trop Enh1 WT foregut injection assayed NF34	1372451	3573	384.117
trop Enh1 WT foregut injection assayed NF34	959829	4826	198.887
trop Enh1 WT foregut injection assayed NF34	832115	3989	208.602
Sample	Firefly	Renilla	Firefly / Renilla	avg	std dev	t test p-value	comparison
trop Enh1 delta single Tbx site foregut inj assayed NF34	325668	2021	161.142	104.412	30.3675	0.00156997	(vs WT fg inj)
trop Enh1 delta single Tbx site foregut inj assayed NF34	214217	1903	112.568
trop Enh1 delta single Tbx site foregut inj assayed NF34	193889	1979	97.9732
trop Enh1 delta single Tbx site foregut inj assayed NF34	298761	3183	93.8615
trop Enh1 delta single Tbx site foregut inj assayed NF34	154228	2007	76.845
trop Enh1 delta single Tbx site foregut inj assayed NF34	198007	2355	84.0794
Sample	Firefly	Renilla	Firefly / Renilla	avg	std dev	t test p-value	comparison
trop Enh1 WT hindgut injection assayed NF34	21547	1857	11.6031	11.3268	2.95833	0.000316773	(vs WT fg inj)
trop Enh1 WT hindgut injection assayed NF34	30109	2327	12.939
trop Enh1 WT hindgut injection assayed NF34	19339	1902	10.1677
trop Enh1 WT hindgut injection assayed NF34	25069	1986	12.6229
trop Enh1 WT hindgut injection assayed NF34	18225	3002	6.07095
trop Enh1 WT hindgut injection assayed NF34	41823	2873	14.5573
Sample	Firefly	Renilla	Firefly / Renilla	avg	std dev	t test p-value	comparison
trop Enh1 delta single Tbx site hindgut inj assayed NF34	28006	1994	14.0451	10.5328	2.91747
trop Enh1 delta single Tbx site hindgut inj assayed NF34	26326	1893	13.907
trop Enh1 delta single Tbx site hindgut inj assayed NF34	18311	2011	9.10542
trop Enh1 delta single Tbx site hindgut inj assayed NF34	41809	3875	10.7894
trop Enh1 delta single Tbx site hindgut inj assayed NF34	26712	3289	8.12162
trop Enh1 delta single Tbx site hindgut inj assayed NF34	28993	4011	7.22837
Sample	Firefly	Renilla	Firefly / Renilla	avg	std dev	t test p-value	comparison
trop Enh1 WT + 100pg Tbx5 hindgut inj assayed NF34	1764573	2045	862.872	654.329	110.805	3.07712e-05	(vs WT hg inj)
trop Enh1 WT + 100pg Tbx5 hindgut inj assayed NF34	1259457	1899	663.221
trop Enh1 WT + 100pg Tbx5 hindgut inj assayed NF34	1109377	1957	566.876
trop Enh1 WT + 100pg Tbx5 hindgut inj assayed NF34	1762152	2899	607.848
trop Enh1 WT + 100pg Tbx5 hindgut inj assayed NF34	1844761	3265	565.011
trop Enh1 WT + 100pg Tbx5 hindgut inj assayed NF34	2262314	3427	660.144
Sample	Firefly	Renilla	Firefly / Renilla	avg	std dev	t test p-value	comparison
trop Enh1 delta single Tbx site + 100pg Tbx5 hindgut assayed NF34	957221	1879	509.431	367.424	76.9018	0.000574647	(vs WT + Tbx5 hg inj)
trop Enh1 delta single Tbx site + 100pg Tbx5 hindgut assayed NF34	823659	2163	380.795
trop Enh1 delta single Tbx site + 100pg Tbx5 hindgut assayed NF34	747715	2048	365.095
trop Enh1 delta single Tbx site + 100pg Tbx5 hindgut assayed NF34	843887	2875	293.526
trop Enh1 delta single Tbx site + 100pg Tbx5 hindgut assayed NF34	729090	2110	345.54
trop Enh1 delta single Tbx site + 100pg Tbx5 hindgut assayed NF34	972346	3135	310.158
Sample	Firefly	Renilla	Firefly / Renilla	avg	std dev	t test p-value	comparison
mouse Enh1 WT foregut injection assayed NF34	829312	3999	207.38	221.969	32.1219
mouse Enh1 WT foregut injection assayed NF34	798308	4143	192.688
mouse Enh1 WT foregut injection assayed NF34	927431	3665	253.051
mouse Enh1 WT foregut injection assayed NF34	1253176	5119	244.809
mouse Enh1 WT foregut injection assayed NF34	980045	3879	252.654
mouse Enh1 WT foregut injection assayed NF34	723111	3990	181.231
Sample	Firefly	Renilla	Firefly / Renilla	avg	std dev	t test p-value	comparison
mouse Enh1 delta single Tbx site foregut inj assayed NF34	354899	3675	96.5712	108.508	30.1021	8.92105e-05	(vs mouse WT Enh1 fg inj)
mouse Enh1 delta single Tbx site foregut inj assayed NF34	340732	3345	101.863
mouse Enh1 delta single Tbx site foregut inj assayed NF34	305391	3689	82.7842
mouse Enh1 delta single Tbx site foregut inj assayed NF34	621090	5989	103.705
mouse Enh1 delta single Tbx site foregut inj assayed NF34	523117	5336	98.0354
mouse Enh1 delta single Tbx site foregut inj assayed NF34	808663	4811	168.086
Sample	Firefly	Renilla	Firefly / Renilla	avg	std dev	t test p-value	comparison
mouse Enh1 WT hindgut injection assayed NF34	34266	3758	9.11815	11.8097	3.96732	1.40929e-05	(vs mouse WT Enh1 fg inj)
mouse Enh1 WT hindgut injection assayed NF34	45984	3542	12.9825
mouse Enh1 WT hindgut injection assayed NF34	39469	3968	9.94682
mouse Enh1 WT hindgut injection assayed NF34	60095	4420	13.5962
mouse Enh1 WT hindgut injection assayed NF34	75871	4173	18.1814
mouse Enh1 WT hindgut injection assayed NF34	25234	3588	7.03289
Sample	Firefly	Renilla	Firefly / Renilla	avg	std dev	t test p-value	comparison
mouse Enh1 delta single Tbx site hindgut inj assayed NF34	52172	3721	14.021	13.7164	3.04086
mouse Enh1 delta single Tbx site hindgut inj assayed NF34	62109	4009	15.4924
mouse Enh1 delta single Tbx site hindgut inj assayed NF34	37111	4139	8.96618
mouse Enh1 delta single Tbx site hindgut inj assayed NF34	63338	3559	17.7966
mouse Enh1 delta single Tbx site hindgut inj assayed NF34	59807	4860	12.306
mouse Enh1 delta single Tbx site hindgut inj assayed NF34	51449	4199	12.2527
Sample	Firefly	Renilla	Firefly / Renilla	avg	std dev	t test p-value	comparison
mouse Enh1 WT + 100pg Tbx5 hindgut inj assayed NF34	1687349	4273	394.886	458.102	65.4969	1.3415e-05	(vs mouse WT Enh1 hg inj)
mouse Enh1 WT + 100pg Tbx5 hindgut inj assayed NF34	1323116	3476	380.643
mouse Enh1 WT + 100pg Tbx5 hindgut inj assayed NF34	1810780	3693	490.328
mouse Enh1 WT + 100pg Tbx5 hindgut inj assayed NF34	2001222	3710	539.413
mouse Enh1 WT + 100pg Tbx5 hindgut inj assayed NF34	1653254	3222	513.114
mouse Enh1 WT + 100pg Tbx5 hindgut inj assayed NF34	1772980	4121	430.231
Sample	Firefly	Renilla	Firefly / Renilla	avg	std dev	t test p-value	comparison
mouse Enh1 delta single Tbx site + 100pg Tbx5 hindgut inj assayed NF34	887117	3895	227.758	220.996	62.1066	7.5904e-05	(vs mouse WT Enh1 + Tbx5 hg inj)
mouse Enh1 delta single Tbx site + 100pg Tbx5 hindgut inj assayed NF34	999003	4254	234.839
mouse Enh1 delta single Tbx site + 100pg Tbx5 hindgut inj assayed NF34	634811	3839	165.358
mouse Enh1 delta single Tbx site + 100pg Tbx5 hindgut inj assayed NF34	599012	4429	135.248
mouse Enh1 delta single Tbx site + 100pg Tbx5 hindgut inj assayed NF34	834253	3261	255.827
mouse Enh1 delta single Tbx site + 100pg Tbx5 hindgut inj assayed NF34	922371	3005	306.945
