# Supplementary material for: Tbx5 drives Aldh1a2 expression to regulate a RA-Hedgehog-Wnt gene regulatory network coordinating cardiopulmonary development
Source: eLife. 2021 Oct 13;10:e69288. doi: 10.7554/eLife.69288 (PMC8555986; doi:10.7554/eLife.69288)
Supplement: Figure 4—source data 1. — Xenopus explant RT-qPCR source data. GR-Tbx5 directly activated aldh1a2 in Xenopus anterior or posterior mesendoderm explants. NF10.5 anterior or posterior mesendoderm explants were treated for 2 hr in CHX prior to 6 hr in CHX+DEX. [file elife-69288-fig4-data1.xlsx]

## Sheet: Sheet1
Sample	Target	Ct		Target	Ct		delta Ct	dd Ct	relative expression (2^-ddCt)		t-test p-value	comparison
AME + DEX	odc	19.773		aldh1a2	23.3943		3.6213	0	1
AME + DEX	odc	19.655		aldh1a2	23.689		4.034	0	1
AME + DEX	odc	19.009		aldh1a2	23.752		4.743	0	1
AME + GR-Tbx5 no DEX	odc	19.741		aldh1a2	23.418		3.677	-0.0557	0.962128
AME + GR-Tbx5 no DEX	odc	19.832		aldh1a2	23.895		4.063	-0.029	0.980099
AME + GR-Tbx5 no DEX	odc	19.128		aldh1a2	23.375		4.247	0.496	1.4103
AME + GR-Tbx5 + DEX	odc	19.747		aldh1a2	20.084		0.337	3.2843	9.74255		0.0339435	(vs AME + GR-Tbx5 no DEX)
AME + GR-Tbx5 + DEX	odc	19.326		aldh1a2	20.368		1.042	2.992	7.95576
AME + GR-Tbx5 + DEX	odc	19.504		aldh1a2	20.434		0.93	3.813	14.0549
AME + GR-Tbx5 + CHX + DEX	odc	19.896		aldh1a2	19.119		-0.777	4.3983	21.0873		0.0316203	(vs AME + GR-Tbx5 + DEX)
AME + GR-Tbx5 + CHX + DEX	odc	19.779		aldh1a2	19.267		-0.512	4.546	23.3605
AME + GR-Tbx5 + CHX + DEX	odc	19.863		aldh1a2	19.581		-0.282	5.025	32.5594
AME + GR-Tbx5 No Dex + CHX	odc	19.178		aldh1a2	21.811		2.633	0.9883	1.98385
AME + GR-Tbx5 No Dex + CHX	odc	19.249		aldh1a2	22.227		2.978	1.056	2.07916
AME + GR-Tbx5 No Dex + CHX	odc	19.529		aldh1a2	22.601		3.072	1.671	3.18435
Sample	Target	Ct		Target	Ct		delta Ct	dd Ct	2^ddCt		t-test p-value	comparison
PME + DEX	odc	20.133		aldh1a2	22.405		2.272	1.3493	2.54788
PME + DEX	odc	20.294		aldh1a2	22.196		1.902	2.132	4.38325
PME + DEX	odc	20.553		aldh1a2	23.298		2.745	1.998	3.99446
PME + GR-Tbx5 no DEX	odc	20.119		aldh1a2	22.916		2.797	0.8243	1.77068
PME + GR-Tbx5 no DEX	odc	20.799		aldh1a2	23.372		2.573	1.461	2.75299
PME + GR-Tbx5 no DEX	odc	20.268		aldh1a2	23.607		3.339	1.404	2.64634
PME+ GR-Tbx5 + DEX	odc	20.202		aldh1a2	19.007		-1.195	4.8163	28.1741		0.0140476	(vs PME + GR-Tbx5 no DEX)
PME+ GR-Tbx5 + DEX	odc	20.619		aldh1a2	19.321		-1.298	5.332	40.2802
PME+ GR-Tbx5 + DEX	odc	20.263		aldh1a2	19.653		-0.61	5.353	40.8708
PME + GR-Tbx5 + CHX + DEX	odc	20.435		aldh1a2	18.622		-1.813	5.4343	43.2402		0.0922418	(vs PME + GR-Tbx5 + DEX)
PME + GR-Tbx5 + CHX + DEX	odc	20.162		aldh1a2	18.554		-1.608	5.642	49.9357
PME + GR-Tbx5 + CHX + DEX	odc	20.336		aldh1a2	19.428		-0.908	5.651	50.2482
PME + GR-Tbx5 No Dex + CHX	odc	20.723		aldh1a2	22.266		1.543	2.0783	4.22309
PME + GR-Tbx5 No Dex + CHX	odc	20.899		aldh1a2	22.689		1.79	2.244	4.73709
PME + GR-Tbx5 No Dex + CHX	odc	20.376		aldh1a2	22.354		1.978	2.765	6.79748
