# Supplementary material for: Tbx5 drives Aldh1a2 expression to regulate a RA-Hedgehog-Wnt gene regulatory network coordinating cardiopulmonary development
Source: eLife. 2021 Oct 13;10:e69288. doi: 10.7554/eLife.69288 (PMC8555986; doi:10.7554/eLife.69288)
Supplement: Figure 4—source data 2. — Temporal analyses of mouse and Xenopus tropicalis enh1-driven luciferase activity in the foregut. [file elife-69288-fig4-data2.xlsx]

## Sheet: Sheet1
Fig 4_H_ source data: temporal anlaysis of mouse, X.trop Enh1-driven luciferase activity in foregut at NF10.5, NF15, NF20, NF25, NF33/34
Sample	Firefly	Renilla	Firefly / Renilla	avg	std dev	t-test p-value	comparison
mouse Enh1 WT foregut injection assayed NF10.5	55839	12909	4.32559	3.83167	0.728616
mouse Enh1 WT foregut injection assayed NF10.5	50296	13228	3.80224
mouse Enh1 WT foregut injection assayed NF10.5	35128	13701	2.5639
mouse Enh1 WT foregut injection assayed NF10.5	61373	12994	4.72318
mouse Enh1 WT foregut injection assayed NF10.5	45821	12236	3.74477
mouse Enh1 WT foregut injection assayed NF10.5	49392	12895	3.83032
mouse Enh1 WT foregut injection assayed NF15	129102	13629	9.4726	11.7494	1.93106
mouse Enh1 WT foregut injection assayed NF15	165018	13990	11.7954
mouse Enh1 WT foregut injection assayed NF15	138944	12892	10.7775
mouse Enh1 WT foregut injection assayed NF15	150095	11088	13.5367
mouse Enh1 WT foregut injection assayed NF15	128753	12359	10.4178
mouse Enh1 WT foregut injection assayed NF15	162274	11194	14.4965
mouse Enh1 WT foregut injection assayed NF20	287193	13146	21.8464	22.33	8.70593
mouse Enh1 WT foregut injection assayed NF20	134149	13887	9.66004
mouse Enh1 WT foregut injection assayed NF20	227914	13903	16.3932
mouse Enh1 WT foregut injection assayed NF20	369704	12764	28.9646
mouse Enh1 WT foregut injection assayed NF20	301589	13102	23.0185
mouse Enh1 WT foregut injection assayed NF20	412337	12093	34.0972
mouse Enh1 WT foregut injection assayed NF25	1501199	14156	106.047	122.269	33.0913	0.000318938	(vs mouse Enh1 WT fg NF10.5)
mouse Enh1 WT foregut injection assayed NF25	1378245	14923	92.3571
mouse Enh1 WT foregut injection assayed NF25	1312037	13515	97.0801
mouse Enh1 WT foregut injection assayed NF25	1609613	13005	123.769
mouse Enh1 WT foregut injection assayed NF25	2298769	12623	182.11
mouse Enh1 WT foregut injection assayed NF25	1681860	12717	132.253
mouse Enh1 WT foregut injection assayed NF33/34	4456164	14908	298.911	257.107	32.7663	7.51625e-06	(vs mouse Enh1 WT fg NF10.5)
mouse Enh1 WT foregut injection assayed NF33/34	3607996	12711	283.848
mouse Enh1 WT foregut injection assayed NF33/34	2854301	13202	216.202
mouse Enh1 WT foregut injection assayed NF33/34	3812561	14196	268.566
mouse Enh1 WT foregut injection assayed NF33/34	3209075	14289	224.584
mouse Enh1 WT foregut injection assayed NF33/34	3700378	14770	250.533
Sample	Firefly	Renilla	Firefly / Renilla	avg	std dev	t-test p-value	comparison
trop Enh1 WT foregut injection assayed NF10.5	34704	17707	1.9599	2.23021	0.384849
trop Enh1 WT foregut injection assayed NF10.5	40183	16381	2.45302
trop Enh1 WT foregut injection assayed NF10.5	38224	16143	2.36784
trop Enh1 WT foregut injection assayed NF10.5	33055	16878	1.95847
trop Enh1 WT foregut injection assayed NF10.5	29226	16087	1.81675
trop Enh1 WT foregut injection assayed NF10.5	50609	17913	2.82527
trop Enh1 WT foregut injection assayed NF15	67990	15236	4.46246	4.39494	0.492074
trop Enh1 WT foregut injection assayed NF15	78129	16939	4.61237
trop Enh1 WT foregut injection assayed NF15	74503	16337	4.56038
trop Enh1 WT foregut injection assayed NF15	83441	16451	5.07209
trop Enh1 WT foregut injection assayed NF15	67498	17012	3.96767
trop Enh1 WT foregut injection assayed NF15	59111	15999	3.69467
trop Enh1 WT foregut injection assayed NF20	81038	16814	4.81967	4.59634	0.568495
trop Enh1 WT foregut injection assayed NF20	72356	17098	4.23184
trop Enh1 WT foregut injection assayed NF20	74125	17022	4.35466
trop Enh1 WT foregut injection assayed NF20	102117	18029	5.66404
trop Enh1 WT foregut injection assayed NF20	76843	18116	4.24172
trop Enh1 WT foregut injection assayed NF20	70199	16455	4.26612
trop Enh1 WT foregut injection assayed NF25	1045120	18772	55.6744	62.4543	10.781	3.68386e-05	(vs X.trop Enh1 WT fg NF10.5)
trop Enh1 WT foregut injection assayed NF25	1221134	18003	67.8295
trop Enh1 WT foregut injection assayed NF25	909457	18126	50.1742
trop Enh1 WT foregut injection assayed NF25	1201927	18994	63.2793
trop Enh1 WT foregut injection assayed NF25	1432074	17779	80.5486
trop Enh1 WT foregut injection assayed NF25	1100332	19230	57.2196
trop Enh1 WT foregut injection assayed NF33/34	3939984	22137	177.982	198.386	27.8739	1.20007e-05	(vs X.trop Enh1 WT fg NF10.5)
trop Enh1 WT foregut injection assayed NF33/34	3941614	20169	195.429
trop Enh1 WT foregut injection assayed NF33/34	3537291	20913	169.143
trop Enh1 WT foregut injection assayed NF33/34	4943883	20335	243.122
trop Enh1 WT foregut injection assayed NF33/34	3721832	20074	185.406
trop Enh1 WT anterior mesend NF33/34 fert 2	3992522	18211	219.237
