# Supplementary material for: Tbx5 drives Aldh1a2 expression to regulate a RA-Hedgehog-Wnt gene regulatory network coordinating cardiopulmonary development
Source: eLife. 2021 Oct 13;10:e69288. doi: 10.7554/eLife.69288 (PMC8555986; doi:10.7554/eLife.69288)
Supplement: Figure 4—source data 3. — Luciferase source data. NF34 analysis of mouse and Xenopus tropicalis enh1-driven luciferase activity in the foregut±mismatch MO, tbx5-MO,±Human TBX5 RNA. [file elife-69288-fig4-data3.xlsx]

## Sheet: Sheet1
Fig 4_I source data: NF34 analysis of mouse, X.trop Enh1-driven luciferase activity in foregut +/- mismatch MO, tbx5-MO, +/- Human TBX5 RNA
Sample	Firefly	Renilla	Firefly / Renilla	avg	std dev	t-test p-value	comparison
trop Enh1 WT fg + mismatch-MO assayed NF34	2289434	11416	200.546	219.267	39.8085
trop Enh1 WT fg + mismatch-MO assayed NF34	2410837	9098	264.985
trop Enh1 WT fg + mismatch-MO assayed NF34	2329745	12117	192.271
trop Enh1 WT fg + tbx5-MO assayed NF34	304677	11422	26.6746	36.8866	8.92396	0.0123143	(vs trop Enh1 WT fg + mismatch MO NF34)
trop Enh1 WT fg + tbx5-MO assayed NF34	429049	9935	43.1856
trop Enh1 WT fg + tbx5-MO assayed NF34	394246	9663	40.7995
trop Enh1 WT fg + tbx5-MO + Human TBX5 RNA assayed NF34	2328994	10263	226.931	275.497	43.4961	0.00871422	(vs trop Enh1 WT fg +tbx5 MO NF34)
trop Enh1 WT fg + tbx5-MO + Human TBX5 RNA assayed NF34	2635489	9129	288.694
trop Enh1 WT fg + tbx5-MO + Human TBX5 RNA assayed NF34	3109288	10002	310.867
Sample	Firefly	Renilla	Firefly / Renilla	avg	std dev	t-test p-value	comparison
mouse Enh1 WT fg+ mismatch-MO assayed NF34	2324048	8872	261.953	277.332	28.6246
mouse Enh1 WT fg+ mismatch-MO assayed NF34	2724954	8780	310.359
mouse Enh1 WT fg+ mismatch-MO assayed NF34	2102407	8096	259.685
mouse Enh1 WT fg + tbx5-MO assayed NF34	89682	10623	8.44225	8.1704	1.05458	0.00371039	(vs mouse Enh1 WT fg + mismatch MO NF34)
mouse Enh1 WT fg + tbx5-MO assayed NF34	68923	9837	7.00651
mouse Enh1 WT fg + tbx5-MO assayed NF34	93334	10299	9.06243
mouse Enh1 WT fg + tbx5-MO + Human TBX5 RNA assayed NF34	2645109	9735	271.711	229.481	62.7444	0.0257345	(vs mouse Enh1 WT fg +tbx5 MO NF34)
mouse Enh1 WT fg + tbx5-MO + Human TBX5 RNA assayed NF34	3118926	12026	259.349
mouse Enh1 WT fg + tbx5-MO + Human TBX5 RNA assayed NF34	1477975	9391	157.382
