# Supplementary material for: Tbx5 drives Aldh1a2 expression to regulate a RA-Hedgehog-Wnt gene regulatory network coordinating cardiopulmonary development
Source: eLife. 2021 Oct 13;10:e69288. doi: 10.7554/eLife.69288 (PMC8555986; doi:10.7554/eLife.69288)
Supplement: Figure 4—source data 4. — Luciferase source data. NF34 analysis of mouse WT Enh1 or Tbx motif mutant Enh1-driven luciferase activity in fg or in hg±Tbx5 RNA. [file elife-69288-fig4-data4.xlsx]

## Sheet: Sheet1
Fig 4_J source data: NF34 analysis of mouse WT Enh1 or 3 Tbx motif mutant Enh1-driven luciferase activity in fg or in hg+/- Xenopus Tbx5 RNA
Sample	Firefly	Renilla	Firefly / Renilla	avg	st dev	t-test p-value	comparison
mouse Enh1 WT foregut injection assayed NF34	1092620	2398	455.638	398.584	56.1508
mouse Enh1 WT foregut injection assayed NF34	987224	2875	343.382
mouse Enh1 WT foregut injection assayed NF34	1123148	2831	396.732
mouse Enh1 delta 3 Tbx motifs foregut injection assayed NF34	128583	2099	61.2592	45.3757	14.4336	0.00569841	(vs mouse Enh1 WT fg NF34)
mouse Enh1 delta 3 Tbx motifs foregut injection assayed NF34	98997	2368	41.8062
mouse Enh1 delta 3 Tbx motifs foregut injection assayed NF34	78092	2362	33.0618
mouse Enh1 WT hindgut injection assayed NF34	234881	2613	89.8894	88.452	23.6151
mouse Enh1 WT hindgut injection assayed NF34	139721	2178	64.1511
mouse Enh1 WT hindgut injection assayed NF34	305784	2747	111.316
mouse Enh1 delta 3 Tbx motifs hindgut injection assayed NF34	292006	2590	112.744	99.8131	22.3359	0.577687	(vs mouse Enh1 delta 3Tbx motif hg NF34)
mouse Enh1 delta 3 Tbx motifs hindgut injection assayed NF34	301853	2679	112.674
mouse Enh1 delta 3 Tbx motifs hindgut injection assayed NF34	196232	2651	74.0219
mouse Enh1 WT + Xenopus Tbx5 RNA hindgut injection assayed NF34	2023781	2110	959.138	1069.52	222.942	0.015937	(vs mouse Enh1 WT motif hg NF34)
mouse Enh1 WT + Xenopus Tbx5 RNA hindgut injection assayed NF34	2783514	2099	1326.11
mouse Enh1 WT + Xenopus Tbx5 RNA hindgut injection assayed NF34	1872445	2028	923.296
mouse Enh1 delta 3 Tbx motifs + Xenopus Tbx5 RNA hindgut injection assayed NF34	401227	2196	182.708	118.975	55.2362	0.013722	(vs mouse Enh1 delta 3Tbx + XTbx5 RNA hg NF34)
mouse Enh1 delta 3 Tbx motifs + Xenopus Tbx5 RNA hindgut injection assayed NF34	234628	2629	89.2461
mouse Enh1 delta 3 Tbx motifs + Xenopus Tbx5 RNA hindgut injection assayed NF34	229673	2703	84.9697
