# Supplementary material for: Tbx5 drives Aldh1a2 expression to regulate a RA-Hedgehog-Wnt gene regulatory network coordinating cardiopulmonary development
Source: eLife. 2021 Oct 13;10:e69288. doi: 10.7554/eLife.69288 (PMC8555986; doi:10.7554/eLife.69288)
Supplement: Figure 5—source data 1. — RT-qPCR analysis of Xenopus foregut CP explants treated with FGF8±ketoconazole (Cyp26 inhibitor). Explants were dissected at NF20, cultured 48 hr±DMSO or recombinant Human FGF8a (200 ng/ml)±20 µM ketoconazole and assayed at NF34. RT-qPCR source data. [file elife-69288-fig5-data1.xlsx]

## Sheet: Sheet1
Fig5B_RTqPCR analysis of Xenopus foregut cardiopulmonary explants treated with FGF8 +/- Keto (Cyp26 inhibitor)
dissected NF20, cultured 48 hours +/- DMSO or recombinant Human FGF8a (200ng/mL) +/- 20uM ketoconazole; harvested at NF34; 3 biological replicates for each condition; n=4 pooled explants in each replicate; pooled explants came from 2 to 3 separate fertilization/injection
Sample	target	Ct		target	Ct		Delta Ct	dd Ct	relative expression (2^ddCt)		t-test p-value	comparison
DMSO / 0.2%BSA	odc	19.734		shh	23.336		3.602	-0.23	1.17283		(2-tailed, parametric)
DMSO / 0.2%BSA	odc	19.377		shh	23.518		4.141	0.123	0.918276
DMSO / 0.2%BSA	odc	19.489		shh	24.039		4.55	0.061	0.958599
FGF8 (200ng/mL)	odc	19.224		shh	25.676		6.452	2.62	0.162668		0.00418629	(vs DMSO)
FGF8 (200ng/mL)	odc	19.134		shh	25.012		5.878	1.86	0.275476
FGF8 (200ng/mL)	odc	19.389		shh	26.033		6.644	2.155	0.224533
FGF8 (200ng/mL) + keto	odc	19.124		shh	22.411		3.287	-0.545	1.45902		0.00185219	(vs cont MO+FGF8)
FGF8 (200ng/mL) + keto	odc	19.787		shh	23.501		3.714	-0.304	1.23456
FGF8 (200ng/mL) + keto	odc	19.691		shh	23.902		4.211	-0.278	1.21251
keto / 0.2% BSA	odc	19.417		shh	21.708		2.291	-1.541	2.90996		0.00549841	(vs cont MO+DMS0)
keto / 0.2% BSA	odc	19.348		shh	21.502		2.154	-1.864	3.64016
keto / 0.2% BSA	odc	19.293		shh	21.936		2.643	-1.846	3.59502
uninj untreated VME	odc	19.355		shh	23.187		3.832
uninj untreated VME	odc	19.081		shh	23.099		4.018
uninj untreated VME	odc	19.729		shh	24.218		4.489
Sample	target	Ct		target	Ct		Delta Ct	dd Ct	2^-ddCt		t-test p-value	comparison
DMSO / 0.2%BSA	odc	19.734		wnt2b	24.293		4.559	-0.279	1.21335
DMSO / 0.2%BSA	odc	19.377		wnt2b	24.114		4.737	-0.249	1.18838
DMSO / 0.2%BSA	odc	19.489		wnt2b	23.818		4.329	0.259	0.835667
FGF8 (200ng/mL)	odc	19.224		wnt2b	25.732		6.508	1.67	0.314253		0.00894303	(vs cont MO+DMSO)
FGF8 (200ng/mL)	odc	19.134		wnt2b	26.108		6.974	1.988	0.252088
FGF8 (200ng/mL)	odc	19.389		wnt2b	26.613		7.224	3.154	0.112344
FGF8 (200ng/mL) + keto	odc	19.124		wnt2b	24.239		5.115	0.556	0.680185		0.00376246	(vs cont MO+FGF8)
FGF8 (200ng/mL) + keto	odc	19.787		wnt2b	24.995		5.208	0.471	0.721464
FGF8 (200ng/mL) + keto	odc	19.691		wnt2b	24.183		4.492	0.163	0.893166
keto / 0.2% BSA	odc	19.417		wnt2b	22.348		2.931	-1.628	3.09084		0.00831035	(vs cont MO+DMS0)
keto / 0.2% BSA	odc	19.348		wnt2b	22.118		2.77	-1.967	3.90954
keto / 0.2% BSA	odc	19.293		wnt2b	22.045		2.752	-1.577	2.98349
uninj untreated VME
uninj untreated VME	odc	19.355		wnt2b	24.193		4.838
uninj untreated VME	odc	19.081		wnt2b	24.067		4.986
uninj untreated VME	odc	19.729		wnt2b	23.799		4.07
Sample	target	Ct		target	Ct		Delta Ct	dd Ct	2^-ddCt		t-test p-value	comparison
DMSO / 0.2%BSA	odc	19.734		nkx2-1	24.601		4.867	0.036	1.02527
DMSO / 0.2%BSA	odc	19.377		nkx2-1	25.283		5.906	0.21	0.864537
DMSO / 0.2%BSA	odc	19.489		nkx2-1	24.711		5.222	0.131	0.913198
FGF8 (200ng/mL)	odc	19.224		nkx2-1	26.011		6.787	1.956	0.257742		0.000660778	(vs cont MO+DMSO)
FGF8 (200ng/mL)	odc	19.134		nkx2-1	26.178		7.044	1.348	0.392836
FGF8 (200ng/mL)	odc	19.389		nkx2-1	26.237		6.848	1.757	0.295863
FGF8 (200ng/mL) + keto	odc	19.124		nkx2-1	22.284		3.16	-1.671	3.18435		0.0126792	(vs cont MO+FGF8)
FGF8 (200ng/mL) + keto	odc	19.787		nkx2-1	23.323		3.536	-2.16	4.46915
FGF8 (200ng/mL) + keto	odc	19.691		nkx2-1	23.006		3.315	-1.776	3.42475
keto / 0.2% BSA	odc	19.417		nkx2-1	23.006		3.589	-1.242	2.36526		0.0279437	(vs cont MO+DMS0)
keto / 0.2% BSA	odc	19.348		nkx2-1	23.179		3.831	-1.865	3.64268
keto / 0.2% BSA	odc	19.293		nkx2-1	22.748		3.455	-1.636	3.10803
uninj untreated VME	odc	19.355		nkx2-1	24.186		4.831
uninj untreated VME	odc	19.081		nkx2-1	24.777		5.696
uninj untreated VME	odc	19.729		nkx2-1	24.82		5.091
Sample	target	Ct		target	Ct		Delta Ct	dd Ct	2^-ddCt		t-test p-value	comparison
DMSO / 0.2%BSA	odc	19.734		tbx5	22.619		2.885	0.354	0.782412
DMSO / 0.2%BSA	odc	19.377		tbx5	21.216		1.839	-0.239	1.18017
DMSO / 0.2%BSA	odc	19.489		tbx5	21.339		1.85	0.178	0.883928
FGF8 (200ng/mL)	odc	19.224		tbx5	24.355		5.131	2.6	0.164938		0.0213681	(vs cont MO+DMSO)
FGF8 (200ng/mL)	odc	19.134		tbx5	24.002		4.868	2.79	0.144586
FGF8 (200ng/mL)	odc	19.389		tbx5	23.447		4.058	2.386	0.191312
FGF8 (200ng/mL) + keto	odc	19.124		tbx5	20.392		1.268	-1.263	2.39994		0.0186882	(vs cont MO+FGF8)
FGF8 (200ng/mL) + keto	odc	19.787		tbx5	21.257		1.47	-0.608	1.52414
FGF8 (200ng/mL) + keto	odc	19.691		tbx5	20.333		0.642	-1.03	2.04202
keto / 0.2% BSA	odc	19.417		tbx5	20.297		0.88	-2.005	4.01389		0.00108192	(vs cont MO+DMS0)
keto / 0.2% BSA	odc	19.348		tbx5	19.375		0.027	-1.812	3.51129
keto / 0.2% BSA	odc	19.293		tbx5	19.408		0.115	-1.735	3.32879
uninj untreated VME	odc	19.355		tbx5	21.886		2.531
uninj untreated VME	odc	19.081		tbx5	21.159		2.078
uninj untreated VME	odc	19.729		tbx5	21.401		1.672
Sample	target	Ct		target	Ct		Delta Ct	dd Ct	2^-ddCt		t-test p-value	comparison
DMSO / 0.2%BSA	odc	19.734		aldh1a2	24.11		4.376	0.48	0.716978
DMSO / 0.2%BSA	odc	19.377		aldh1a2	24.312		4.935	0.114	0.924023
DMSO / 0.2%BSA	odc	19.489		aldh1a2	23.694		4.205	0.123	0.918276
FGF8 (200ng/mL)	odc	19.224		aldh1a2	25.902		6.678	2.782	0.14539		0.00632196	(vs cont MO+DMSO)
FGF8 (200ng/mL)	odc	19.134		aldh1a2	26.697		7.563	2.742	0.149477
FGF8 (200ng/mL)	odc	19.389		aldh1a2	26.816		7.427	3.345	0.0984135
FGF8 (200ng/mL) + keto	odc	19.124		aldh1a2	23.262		4.138	0.242	0.845572		0.0267334	(vs cont MO+FGF8)
FGF8 (200ng/mL) + keto	odc	19.787		aldh1a2	24.219		4.432	-0.389	1.30949
FGF8 (200ng/mL) + keto	odc	19.691		aldh1a2	23.966		4.275	0.193	0.874785
keto / 0.2% BSA	odc	19.417		aldh1a2	22.994		3.577	-0.319	1.24747		0.0316343	(vs cont MO+DMS0)
keto / 0.2% BSA	odc	19.348		aldh1a2	23.438		4.09	-0.731	1.65979
keto / 0.2% BSA	odc	19.293		aldh1a2	22.556		3.263	-0.819	1.76418
uninj untreated VME	odc	19.355		aldh1a2	23.251		3.896
uninj untreated VME	odc	19.081		aldh1a2	23.902		4.821
uninj untreated VME	odc	19.729		aldh1a2	23.811		4.082
Sample	target	Ct		target	Ct		Delta Ct	dd Ct	2^-ddCt		t-test p-value	comparison
DMSO / 0.2%BSA	odc	19.734		cyp26a1	24.813		5.079	-0.213	1.1591
DMSO / 0.2%BSA	odc	19.377		cyp26a1	25.087		5.71	-0.22	1.16473
DMSO / 0.2%BSA	odc	19.489		cyp26a1	24.509		5.02	0.01	0.993092
FGF8 (200ng/mL)	odc	19.224		cyp26a1	21.117		1.893	-3.399	10.5487		0.00322892	(vs cont MO+DMSO)
FGF8 (200ng/mL)	odc	19.134		cyp26a1	21.483		2.349	-3.581	11.9671
FGF8 (200ng/mL)	odc	19.389		cyp26a1	21.071		1.682	-3.328	10.0422
FGF8 (200ng/mL) + keto	odc	19.124		cyp26a1	21.499		2.375	-2.917	7.55274		0.195135	(vs cont MO+FGF8)
FGF8 (200ng/mL) + keto	odc	19.787		cyp26a1	22.428		2.641	-3.289	9.77434
FGF8 (200ng/mL) + keto	odc	19.691		cyp26a1	21.333		1.642	-3.368	10.3245
keto / 0.2% BSA	odc	19.417		cyp26a1	25.326		5.909	0.617	0.652025		0.00546279	(vs cont MO+DMS0)
keto / 0.2% BSA	odc	19.348		cyp26a1	25.976		6.628	0.698	0.616426
keto / 0.2% BSA	odc	19.293		cyp26a1	25.124		5.831	0.821	0.566049
uninj untreated VME	odc	19.355		cyp26a1	24.647		5.292
uninj untreated VME	odc	19.081		cyp26a1	25.011		5.93
uninj untreated VME	odc	19.729		cyp26a1	24.739		5.01
Sample	target	Ct		target	Ct		Delta Ct	dd Ct	2^-ddCt		t-test p-value	comparison
DMSO / 0.2%BSA	odc	19.734		gli1	23.813		4.079	0.122	0.918913
DMSO / 0.2%BSA	odc	19.377		gli1	23.253		3.876	-0.157	1.11497
DMSO / 0.2%BSA	odc	19.489		gli1	23.709		4.22	0.174	0.886382
FGF8 (200ng/mL)	odc	19.224		gli1	26.074		6.85	2.893	0.134623		0.00526124	(vs cont MO+DMSO)
FGF8 (200ng/mL)	odc	19.134		gli1	26.178		7.044	3.011	0.124051
FGF8 (200ng/mL)	odc	19.389		gli1	26.971		7.582	3.536	0.0862101
FGF8 (200ng/mL) + keto	odc	19.124		gli1	23.292		4.168	0.211	0.863938		3.76036e-06	(vs cont MO+FGF8)
FGF8 (200ng/mL) + keto	odc	19.787		gli1	24.105		4.318	0.285	0.820742
FGF8 (200ng/mL) + keto	odc	19.691		gli1	24.001		4.31	0.264	0.832776
keto / 0.2% BSA	odc	19.417		gli1	22.081		2.664	-1.293	2.45037		0.000152515	(vs cont MO+DMS0)
keto / 0.2% BSA	odc	19.348		gli1	22.215		2.867	-1.166	2.24389
keto / 0.2% BSA	odc	19.293		gli1	22.124		2.831	-1.215	2.32141
uninj untreated VME	odc	19.355		gli1	23.312		3.957
uninj untreated VME	odc	19.081		gli1	23.114		4.033
uninj untreated VME	odc	19.729		gli1	23.775		4.046
Sample	target	Ct		target	Ct		Delta Ct	dd Ct	2^-ddCt		t-test p-value	comparison
DMSO / 0.2%BSA	odc	19.734		tbx1	22.563		2.829	0.067	0.954621
DMSO / 0.2%BSA	odc	19.377		tbx1	22.279		2.902	-0.454	1.36983
DMSO / 0.2%BSA	odc	19.489		tbx1	22.14		2.651	0.291	0.817335
FGF8 (200ng/mL)	odc	19.224		tbx1	19.829		0.605	-2.157	4.45986		0.000542755	(vs cont MO+DMSO)
FGF8 (200ng/mL)	odc	19.134		tbx1	20.081		0.947	-2.409	5.31106
FGF8 (200ng/mL)	odc	19.389		tbx1	19.516		0.127	-2.233	4.70111
FGF8 (200ng/mL) + keto	odc	19.124		tbx1	23.798		4.674	1.912	0.265724		0.00118289	(vs cont MO+FGF8)
FGF8 (200ng/mL) + keto	odc	19.787		tbx1	24.126		4.339	0.983	0.505927
FGF8 (200ng/mL) + keto	odc	19.691		tbx1	24.373		4.682	2.322	0.19999
keto / 0.2% BSA	odc	19.417		tbx1	25.717		6.3	3.538	0.0860906		0.0271229	(vs cont MO+DMS0)
keto / 0.2% BSA	odc	19.348		tbx1	25.834		6.486	3.13	0.114229
keto / 0.2% BSA	odc	19.293		tbx1	26.003		6.71	4.35	0.0490365
uninj untreated VME	odc	19.355		tbx1	22.117		2.762
uninj untreated VME	odc	19.081		tbx1	22.437		3.356
uninj untreated VME	odc	19.729		tbx1	22.089		2.36
Sample	target	Ct		target	Ct		Delta Ct	dd Ct	2^-ddCt		t-test p-value	comparison
DMSO / 0.2%BSA	odc	19.734		spry2	25.851		6.117	-0.246	1.18591
DMSO / 0.2%BSA	odc	19.377		spry2	25.383		6.006	-0.189	1.13997
DMSO / 0.2%BSA	odc	19.489		spry2	25.662		6.173	0.045	0.96929
FGF8 (200ng/mL)	odc	19.224		spry2	22.017		2.793	-3.57	11.8762		0.00503995	(vs cont MO+DMSO)
FGF8 (200ng/mL)	odc	19.134		spry2	21.518		2.384	-3.811	14.0354
FGF8 (200ng/mL)	odc	19.389		spry2	21.616		2.227	-3.901	14.9389
FGF8 (200ng/mL) + keto	odc	19.124		spry2	23.118		3.994	-2.369	5.16583		0.00578693	(vs cont MO+FGF8)
FGF8 (200ng/mL) + keto	odc	19.787		spry2	23.436		3.649	-2.546	5.84013
FGF8 (200ng/mL) + keto	odc	19.691		spry2	23.603		3.912	-2.216	4.64603
keto / 0.2% BSA	odc	19.417		spry2	28.912		9.495	3.132	0.114071		0.00240752	(vs cont MO+DMS0)
keto / 0.2% BSA	odc	19.348		spry2	29.337		9.989	3.794	0.0720929
keto / 0.2% BSA	odc	19.293		spry2	29.695		10.402	4.274	0.051689
uninj untreated VME	odc	19.355		spry2	25.718		6.363
uninj untreated VME	odc	19.081		spry2	25.276		6.195
uninj untreated VME	odc	19.729		spry2	25.857		6.128
Sample	target	Ct		target	Ct		Delta Ct	dd Ct	2^-ddCt		t-test p-value	comparison
DMSO / 0.2%BSA	odc	19.734		fgf10	24.572		4.838	0.082	0.944747
DMSO / 0.2%BSA	odc	19.377		fgf10	24.759		5.382	-0.165	1.12117
DMSO / 0.2%BSA	odc	19.489		fgf10	24.285		4.796	0.269	0.829895
FGF8 (200ng/mL)	odc	19.224		fgf10	20.457		1.233	-3.523	11.4955		0.00332684	(vs cont MO+DMSO)
FGF8 (200ng/mL)	odc	19.134		fgf10	21.225		2.091	-3.456	10.9739
FGF8 (200ng/mL)	odc	19.389		fgf10	20.194		0.805	-3.722	13.1957
FGF8 (200ng/mL) + keto	odc	19.124		fgf10	24.003		4.879	0.123	0.918276		0.00262361	(vs cont MO+FGF8)
FGF8 (200ng/mL) + keto	odc	19.787		fgf10	25.089		5.302	-0.245	1.18509
FGF8 (200ng/mL) + keto	odc	19.691		fgf10	24.776		5.085	0.558	0.679243
keto / 0.2% BSA	odc	19.417		fgf10	26.121		6.704	1.948	0.259175		0.00714479	(vs cont MO+DMS0)
keto / 0.2% BSA	odc	19.348		fgf10	26.35		7.002	1.455	0.364755
keto / 0.2% BSA	odc	19.293		fgf10	25.832		6.539	2.012	0.247929
uninj untreated VME	odc	19.355		fgf10	24.111		4.756
uninj untreated VME	odc	19.081		fgf10	24.628		5.547
uninj untreated VME	odc	19.729		fgf10	24.256		4.527
