# Supplementary material for: Tbx5 drives Aldh1a2 expression to regulate a RA-Hedgehog-Wnt gene regulatory network coordinating cardiopulmonary development
Source: eLife. 2021 Oct 13;10:e69288. doi: 10.7554/eLife.69288 (PMC8555986; doi:10.7554/eLife.69288)
Supplement: Figure 5—source data 2. — RT-qPCR source data of Xenopus foregut cardiopulmonary explants treated with FGF8±CHX (cycloheximide). [file elife-69288-fig5-data2.xlsx]

## Sheet: Sheet1
Fig5D: RTqPCR analysis of Xenopus foregut cardiopulmonary explants +/- FGF8 +/- CHX (cycloheximide)
dissected NF20, cultured 2 hours in CHX prior to 6 hour culture in CHX+/- recombinant Human FGF8; N=3 biological replicates for each condition; n=4 pooled explants in each replicate; pooled explants came from 2 to 3 separate fertilization clutches
Sample	target	Ct		target	Ct		Delta Ct	dd Ct	2^-ddCt		t-test p-value	comparison
0.2% BSA	odc	19.113		cyp26a1	25.066		5.953	0.308	0.807761
0.2% BSA	odc	19.388		cyp26a1	24.873		5.485	-0.19	1.14076
0.2% BSA	odc	19.021		cyp26a1	24.927		5.906	-0.307	1.23713
0.2% BSA + CHX	odc	19.604		cyp26a1	24.001		4.397	-1.248	2.37512		0.00317079	(vs 0.2%BSA)
0.2% BSA + CHX	odc	19.513		cyp26a1	24.183		4.67	-1.005	2.00694
0.2% BSA + CHX	odc	19.075		cyp26a1	23.985		4.91	-1.303	2.46741
FGF8 (200ng/mL)	odc	19.512		cyp26a1	21.058		1.546	-4.099	17.1365		0.00482334	(vs.0.2%BSA)
FGF8 (200ng/mL)	odc	19.319		cyp26a1	21.177		1.858	-3.817	14.0939
FGF8 (200ng/mL)	odc	19.024		cyp26a1	21.094		2.07	-4.143	17.6672
CHX + FGF8 (200ng/mL)	odc	19.552		cyp26a1	20.337		0.785	-4.86	29.0406		0.00612113	(vs.FGF8)
CHX + FGF8 (200ng/mL)	odc	19.226		cyp26a1	20.219		0.993	-4.682	25.6698
CHX + FGF8 (200ng/mL)	odc	19.415		cyp26a1	21.029		1.614	-4.599	24.2347
uninj untreated	odc	19.237		cyp26a1	24.882		5.645
uninj untreated	odc	19.41		cyp26a1	25.085		5.675
uninj untreated	odc	19.023		cyp26a1	25.236		6.213
Sample	target	Ct		target	Ct		Delta Ct	dd Ct	2^-ddCt		t-test p-value	comparison
0.2% BSA	odc	19.113		fgf10	24.035		4.922	-0.033	1.02314
0.2% BSA	odc	19.388		fgf10	24.476		5.088	0.175	0.885768
0.2% BSA	odc	19.021		fgf10	24.212		5.191	0.029	0.980099
0.2% BSA + CHX	odc	19.604		fgf10	23.164		3.56	-1.395	2.62989		0.00141891	(vs 0.2%BSA)
0.2% BSA + CHX	odc	19.513		fgf10	23.102		3.589	-1.324	2.50359
0.2% BSA + CHX	odc	19.075		fgf10	23.041		3.966	-1.196	2.29104
FGF8 (200ng/mL)	odc	19.512		fgf10	21.119		1.607	-3.348	10.1824		0.00444611	(vs.0.2%BSA)
FGF8 (200ng/mL)	odc	19.319		fgf10	21.163		1.844	-3.069	8.39191
FGF8 (200ng/mL)	odc	19.024		fgf10	21.067		2.043	-3.119	8.68785
CHX + FGF8 (200ng/mL)	odc	19.552		fgf10	24.329		4.777	-0.178	1.13131		0.00160925	(vs.FGF8)
CHX + FGF8 (200ng/mL)	odc	19.226		fgf10	24.277		5.051	0.138	0.908778
CHX + FGF8 (200ng/mL)	odc	19.415		fgf10	23.807		4.392	-0.77	1.70527
uninj untreated	odc	19.237		fgf10	24.192		4.955
uninj untreated	odc	19.41		fgf10	24.323		4.913
uninj untreated	odc	19.023		fgf10	24.185		5.162
Sample	target	Ct		target	Ct		Delta Ct	dd Ct	2^-ddCt		t-test p-value	comparison
0.2% BSA	odc	19.113		tbx1	23.455		4.342	0.453	0.730522
0.2% BSA	odc	19.388		tbx1	23.256		3.868	-0.036	1.02527
0.2% BSA	odc	19.021		tbx1	23.078		4.057	-0.637	1.55509
0.2% BSA + CHX	odc	19.604		tbx1	22.612		3.008	-0.881	1.84165		0.171942	(vs 0.2%BSA)
0.2% BSA + CHX	odc	19.513		tbx1	22.789		3.276	-0.628	1.54542
0.2% BSA + CHX	odc	19.075		tbx1	23.299		4.224	-0.47	1.38511
FGF8 (200ng/mL)	odc	19.512		tbx1	21.056		1.544	-2.345	5.0806		0.0207951	(vs.0.2%BSA)
FGF8 (200ng/mL)	odc	19.319		tbx1	21.194		1.875	-2.029	4.08122
FGF8 (200ng/mL)	odc	19.024		tbx1	20.999		1.975	-2.719	6.58416
CHX + FGF8 (200ng/mL)	odc	19.552		tbx1	24.509		4.957	1.068	0.47698		0.0226322	(vs.FGF8)
CHX + FGF8 (200ng/mL)	odc	19.226		tbx1	24.069		4.843	0.939	0.521594
CHX + FGF8 (200ng/mL)	odc	19.415		tbx1	25.113		5.698	1.004	0.498616
uninj untreated	odc	19.237		tbx1	23.126		3.889
uninj untreated	odc	19.41		tbx1	23.314		3.904
uninj untreated	odc	19.023		tbx1	23.717		4.694
Sample	target	Ct		target	Ct		Delta Ct	dd Ct	2^-ddCt		t-test p-value	comparison
0.2% BSA	odc	19.113		shh	24.121		5.008	-0.327	1.2544
0.2% BSA	odc	19.388		shh	24.008		4.62	-0.037	1.02598
0.2% BSA	odc	19.021		shh	24.387		5.366	0.05	0.965936
0.2% BSA + CHX	odc	19.604		shh	24.261		4.657	-0.678	1.59992		0.423418	(vs 0.2%BSA)
0.2% BSA + CHX	odc	19.513		shh	24.227		4.714	0.057	0.961261
0.2% BSA + CHX	odc	19.075		shh	24.062		4.987	-0.329	1.25614
FGF8 (200ng/mL)	odc	19.512		shh	27.602		8.09	2.755	0.148137		0.00430966	(vs.0.2%BSA)
FGF8 (200ng/mL)	odc	19.319		shh	26.383		7.064	2.407	0.188548
FGF8 (200ng/mL)	odc	19.024		shh	27.969		8.945	3.629	0.0808281
CHX + FGF8 (200ng/mL)	odc	19.552		shh	23.853		4.301	-1.034	2.04769		0.0292627	(vs.FGF8)
CHX + FGF8 (200ng/mL)	odc	19.226		shh	23.702		4.476	-0.181	1.13367
CHX + FGF8 (200ng/mL)	odc	19.415		shh	23.991		4.576	-0.74	1.67018
uninj untreated	odc	19.237		shh	24.572		5.335
uninj untreated	odc	19.41		shh	24.067		4.657
uninj untreated	odc	19.023		shh	24.339		5.316
