# Supplementary material for: Tbx5 drives Aldh1a2 expression to regulate a RA-Hedgehog-Wnt gene regulatory network coordinating cardiopulmonary development
Source: eLife. 2021 Oct 13;10:e69288. doi: 10.7554/eLife.69288 (PMC8555986; doi:10.7554/eLife.69288)
Supplement: Figure 6—figure supplement 2—source data 1. [file elife-69288-fig6-figsupp2-data1.xlsx]

## Sheet: injection 1
Sample	Firefly	Renilla	Firefly / Renilla		comparison	t-test p-value
WT Human SHH MACS1 foregut endo only	98972	13619	7.2672
WT Human SHH MACS1 foregut endo only	89573	18772	4.77163
WT Human SHH MACS1 foregut endo only	77291	16503	4.68345
WT Human SHH MACS1 foregut endo + 25nM RA	1969247	13662	144.14		vs WT human fg endo only	0.00349596
WT Human SHH MACS1 foregut endo + 25nM RA	2383654	15798	150.883
WT Human SHH MACS1 foregut endo + 25nM RA	2770805	16145	171.62
2RAR mutant Human SHH MACS1 foregut endo only	98883	17229	5.73933
2RAR mutant Human SHH MACS1 foregut endo only	91437	14781	6.18612
2RAR mutant Human SHH MACS1 foregut endo only	128739	17932	7.17929
2RAR mutant Human SHH MACS1 foregut endo + 25nM RA	948912	18089	52.458		vs 2RAR mutant Human SHH MACS1 fg endo only	0.016716
2RAR mutant Human SHH MACS1 foregut endo + 25nM RA	1069003	14274	74.8916		vs WT Human SHH MACS1 fg endo + RA	0.0151335
2RAR mutant Human SHH MACS1 foregut endo + 25nM RA	872361	15821	55.1394
WT X.trop shh MACS1 foregut endo only	61089	13529	4.51541
WT X.trop shh MACS1 foregut endo only	45222	14118	3.20314
WT X.trop shh MACS1 foregut endo only	29840	17456	1.70944
WT X.trop shh MACS1 foregut endo +25nM RA	2612664	12997	201.021		vs WT X.trop shh MACS1 foregut endo only	0.0163353
WT X.trop shh MACS1 foregut endo +25nM RA	4887597	17243	283.454
WT X.trop shh MACS1 foregut endo +25nM RA	2343675	12141	193.038
2RAR mutant X.trop MACS1 foregut endo only	78193	15660	4.99317
2RAR mutant X.trop MACS1 foregut endo only	102336	16306	6.27597
2RAR mutant X.trop MACS1 foregut endo only	92558	16835	5.49795
2RAR mutant X.trop MACS1 foregut endo + 25nM RA	1237112	16296	75.9151		vs 2RAR mutant X.torp shh MACS1 fg endo only	0.0182113
2RAR mutant X.trop MACS1 foregut endo + 25nM RA	1367095	19004	71.9372		vs WT X.trop shh MACS1 fg endo + RA	0.0259103
2RAR mutant X.trop MACS1 foregut endo + 25nM RA	761273	15378	49.504

## Sheet: injection 2
Sample	Firefly	Renilla	Firefly / Renilla		comparison	t-test p-value
WT Human SHH MACS1 foregut endo only	198974	18745	10.6148
WT Human SHH MACS1 foregut endo only	195373	13419	14.5594
WT Human SHH MACS1 foregut endo only	216388	13944	15.5184
WT Human SHH MACS1 foregut endo + 25nM RA	4305199	13096	328.742		vs WT human fg endo only	0.00159718
WT Human SHH MACS1 foregut endo + 25nM RA	6057651	18619	325.348
WT Human SHH MACS1 foregut endo + 25nM RA	5232116	17783	294.22
2RAR mutant Human SHH MACS1 foregut endo only	617678	14495	42.6132
2RAR mutant Human SHH MACS1 foregut endo only	604558	18293	33.0486
2RAR mutant Human SHH MACS1 foregut endo only	732881	14338	51.1146
2RAR mutant Human SHH MACS1 foregut endo + 25nM RA	1171539	16255	72.0725		vs 2RAR mutant Human SHH MACS1 fg endo only	0.161528
2RAR mutant Human SHH MACS1 foregut endo + 25nM RA	1137066	14504	78.3967		vs WT Human SHH MACS1 fg endo + RA	0.000417648
2RAR mutant Human SHH MACS1 foregut endo + 25nM RA	879081	15969	55.0492
WT X.trop shh MACS1 foregut endo only	149553	14653	10.2063
WT X.trop shh MACS1 foregut endo only	319028	14245	22.3958
WT X.trop shh MACS1 foregut endo only	99035	16717	5.92421
WT X.trop shh MACS1 foregut endo +25nM RA	5311832	14116	376.299		vs WT X.trop shh MACS1 foregut endo only	0.0155033
WT X.trop shh MACS1 foregut endo +25nM RA	4985119	17401	286.485
WT X.trop shh MACS1 foregut endo +25nM RA	5127908	12262	418.195
2RAR mutant X.trop MACS1 foregut endo only	1009423	15083	66.9246
2RAR mutant X.trop MACS1 foregut endo only	792997	14191	55.8803
2RAR mutant X.trop MACS1 foregut endo only	1120351	14989	74.7449
2RAR mutant X.trop MACS1 foregut endo + 25nM RA	1305686	16713	78.124		vs 2RAR mutant X.torp shh MACS1 fg endo only	0.124305
2RAR mutant X.trop MACS1 foregut endo + 25nM RA	1815638	15996	113.506		vs WT X.trop shh MACS1 fg endo + RA	0.027059
2RAR mutant X.trop MACS1 foregut endo + 25nM RA	1654987	15178	109.039
