# Supplementary material for: Tbx5 drives Aldh1a2 expression to regulate a RA-Hedgehog-Wnt gene regulatory network coordinating cardiopulmonary development
Source: eLife. 2021 Oct 13;10:e69288. doi: 10.7554/eLife.69288 (PMC8555986; doi:10.7554/eLife.69288)
Supplement: Figure 6—source data 1. — RT-qPCR source data of Xenopus foregut endoderm explants treated for 2 hr in cycloheximide (CHX) prior to 6 hr in CHX +25 nM RA. [file elife-69288-fig6-data1.xlsx]

## Sheet: Sheet1
Fig_6B_ RTqPCR analysis of Xenopus foregut cardiopulmonary explants treated +/- 25nM RA +/- CHX; 8 hours total culture
Sample	target	Ct		target	Ct	d Ct	ddCt	relative expression (2^-ddCt)	avg	std dev	t-test p-value	comparison
uninj untreated fg endo	odc	22.136		shh	26.287	4.28
uninj untreated fg endo	odc	22.007		shh	26.119	3.924
uninj untreated fg endo	odc	22.195		shh	26.61	4.415
DMSO fg endo	odc	22.417		shh	26.411	3.994	-0.286	1.21926	1.1787	0.103848
DMSO fg endo	odc	22.4		shh	26.239	3.839	-0.085	1.06069
DMSO fg endo	odc	22.089		shh	26.175	4.086	-0.329	1.25614
RA fg endo	odc	22.181		shh	22.688	0.507	-3.773	13.6706	13.4992	0.821421	0.00127295	(vs DMSO fg endo)
RA fg endo	odc	22.214		shh	22.308	0.094	-3.83	14.2215
RA fg endo	odc	22.402		shh	23.161	0.759	-3.656	12.6057
RA + CHX fg endo	odc	22.519		shh	24.29	1.771	-2.509	5.69225	6.2553	1.11275	0.015007	(vs DMSO fg endo)
RA + CHX fg endo	odc	22.323		shh	23.778	1.455	-2.469	5.5366			0.00119555	(vs RA fg endo)
RA + CHX fg endo	odc	22.198		shh	23.699	1.501	-2.914	7.53705
CHX fg endo	odc	22.428		shh	26.007	3.579	-0.701	1.62563	1.71748	0.366708
CHX fg endo	odc	22.556		shh	25.989	3.433	-0.491	1.40542
CHX fg endo	odc	22.293		shh	25.623	3.33	-1.085	2.12138
uninj untreated fg mesoderm	odc	22.008		shh	40	17.992	13.712	7.45207e-05	7.53721e-05	9.35973e-06
uninj untreated fg mesoderm	odc	22.199		shh	40	17.801	13.877	6.64671e-05
uninj untreated fg mesoderm	odc	22.065		shh	40	17.935	13.52	8.51284e-05
Sample	target	Ct		target	Ct	d Ct	ddCt	2^-ddCt	avg	std dev	t-test p-value	comparison
uninj untreated fg endo	odc	22.136		dhh	25.676	3.669
uninj untreated fg endo	odc	22.007		dhh	25.703	3.508
uninj untreated fg endo	odc	22.195		dhh	25.368	3.173
DMSO fg endo	odc	22.417		dhh	25.461	3.044	-0.625	1.54221	1.42141	0.192033
DMSO fg endo	odc	22.4		dhh	25.302	2.902	-0.606	1.52203
DMSO fg endo	odc	22.089		dhh	24.999	2.91	-0.263	1.19997
RA fg endo	odc	22.181		dhh	21.604	-0.577	-4.246	18.9746	18.9207	2.82741	0.00835836	(vs DMSO fg endo)
RA fg endo	odc	22.214		dhh	21.281	-0.933	-4.441	21.7207
RA fg endo	odc	22.402		dhh	21.569	-0.833	-4.006	16.0667
RA + CHX fg endo	odc	22.519		dhh	22.649	0.13	-3.539	11.6237	10.1481	1.28914	0.00627087	(vs DMSO fg endo)
RA + CHX fg endo	odc	22.273		dhh	22.573	0.3	-3.208	9.24069			0.0192251	(vs RA fg endo)
RA + CHX fg endo	odc	22.198		dhh	22.111	-0.087	-3.26	9.57983
CHX fg endo	odc	22.428		dhh	25.101	2.673	-0.996	1.99446	1.59108	1.59108
CHX fg endo	odc	22.556		dhh	25.274	2.718	-0.79	1.72907
CHX fg endo	odc	22.293		dhh	25.396	3.103	-0.07	1.04972
uninj untreated fg mesoderm	odc	22.008		dhh	40	17.992	14.948	3.16376e-05	3.14538e-05	1.37787e-06
uninj untreated fg mesoderm	odc	22.199		dhh	40	17.801	14.899	3.27306e-05
uninj untreated fg mesoderm	odc	22.065		dhh	40	17.935	15.025	2.99933e-05
Sample	target	Ct		target	Ct	d Ct	ddCt	2^-ddCt	avg	std dev	t-test p-value	comparison
uninj untreated fg endo	odc	21.047		hnf1b	24.16	2.962
uninj untreated fg endo	odc	21.198		hnf1b	24.692	3.445
uninj untreated fg endo	odc	21.247		hnf1b	24.333	3.086
DMSO fg endo	odc	21.096		hnf1b	24.212	3.116	0.154	0.898755	1.0149	0.10532
DMSO fg endo	odc	21.115		hnf1b	24.417	3.302	-0.143	1.1042
DMSO fg endo	odc	21.226		hnf1b	24.253	3.027	-0.059	1.04174
RA fg endo	odc	21.185		hnf1b	22.305	1.12	-1.842	3.58507	4.00612	0.716377	0.0169141	(vs DMSO fg endo)
RA fg endo	odc	21.372		hnf1b	22.544	1.172	-2.273	4.83327
RA fg endo	odc	21.224		hnf1b	22.462	1.238	-1.848	3.60001
RA + CHX fg endo	odc	21.453		hnf1b	21.419	-0.034	-2.996	7.97785	9.8685	1.77055	0.0128356	(vs DMSO fg endo)
RA + CHX fg endo	odc	21.664		hnf1b	21.767	0.103	-3.342	10.1401			0.0178817	(vs RA fg endo)
RA + CHX fg endo	odc	21.578		hnf1b	21.142	-0.436	-3.522	11.4876
CHX fg endo	odc	21.404		hnf1b	24.014	2.61	-0.352	1.27633	1.39134	0.199976
CHX fg endo	odc	21.634		hnf1b	24.381	2.747	-0.698	1.62225
CHX fg endo	odc	21.492		hnf1b	24.227	2.735	-0.351	1.27544
uninj untreated fg mesoderm	odc	21.443		hnf1b	40	18.557	15.441	2.248e-05	2.34685e-05	4.92363e-06
uninj untreated fg mesoderm	odc	21.615		hnf1b	40	18.385	15.083	2.88114e-05
uninj untreated fg mesoderm	odc	21.298		hnf1b	40	18.702	15.675	1.91141e-05
Sample	target	Ct		target	Ct	d Ct	ddCt	2^-ddCt	avg	std dev	t-test p-value	comparison
uninj untreated fg endo	odc	22.136		ptf1a	40	17.993
uninj untreated fg endo	odc	22.007		ptf1a	40	17.805
uninj untreated fg endo	odc	22.195		ptf1a	40	17.805
DMSO fg endo	odc	22.417		ptf1a	40	17.583	-0.41	1.32869	1.13684	0.200233
DMSO fg endo	odc	22.4		ptf1a	40	17.6	-0.205	1.15269
DMSO fg endo	odc	22.089		ptf1a	40	17.911	0.106	0.929161
RA fg endo	odc	22.181		ptf1a	28.021	5.84	-12.153	4554.26	4923.7	328.875	0.00148453	(vs DMSO fg endo)
RA fg endo	odc	22.214		ptf1a	27.679	5.465	-12.34	5184.54
RA fg endo	odc	22.402		ptf1a	27.91	5.508	-12.297	5032.29
RA + CHX fg endo	odc	22.519		ptf1a	31.438	8.919	-9.074	538.947	389.391	138.102	0.0396806	(vs DMSO fg endo)
RA + CHX fg endo	odc	22.273		ptf1a	31.576	9.303	-8.502	362.541			0.000413746	(vs RA fg endo)
RA + CHX fg endo	odc	22.198		ptf1a	31.944	9.746	-8.059	266.686
CHX fg endo	odc	22.428		ptf1a	40	17.572	-0.421	1.33886	1.23115	0.141957
CHX fg endo	odc	22.556		ptf1a	40	17.444	-0.361	1.28432
CHX fg endo	odc	22.293		ptf1a	40	17.707	-0.098	1.07029
uninj untreated fg mesoderm	odc	22.008		ptf1a	40	17.992	-0.001	1.00069	0.972434	0.0507618
uninj untreated fg mesoderm	odc	22.199		ptf1a	40	17.801	-0.004	1.00278
uninj untreated fg mesoderm	odc	22.065		ptf1a	40	17.935	0.13	0.913831
Sample	target	Ct		target	Ct	d Ct	ddCt	2^-ddCt	avg	std dev	t-test p-value	comparison
uninj untreated fg endo	odc	22.136		foxa1	21.104	-0.903
uninj untreated fg endo	odc	22.007		foxa1	22.399	0.204
uninj untreated fg endo	odc	22.195		foxa1	22.187	-0.008
DMSO fg endo	odc	22.417		foxa1	21.543	-0.874	0.029	0.980099	1.0471	0.149529
DMSO fg endo	odc	22.4		foxa1	22.319	-0.081	-0.285	1.21841
DMSO fg endo	odc	22.089		foxa1	22.166	0.077	0.085	0.942785
RA fg endo	odc	22.181		foxa1	21.084	-1.097	-0.194	1.14393	1.20247	0.164269	0.292917	(vs DMSO fg endo)
RA fg endo	odc	22.214		foxa1	22.313	0.099	-0.105	1.07549
RA fg endo	odc	22.402		foxa1	21.921	-0.481	-0.473	1.38799
RA + CHX fg endo	odc	22.519		foxa1	21.683	-0.836	0.067	0.954621	1.34907	0.473416	0.23415	(vs DMSO fg endo)
RA + CHX fg endo	odc	22.273		foxa1	21.675	-0.598	-0.802	1.74352			0.393337	(vs RA fg endo)
RA + CHX fg endo	odc	22.198		foxa1	21.34	-0.858	-0.85	1.8025
CHX fg endo	odc	22.428		foxa1	21.706	-0.722	0.181	0.882091	0.785012	0.169029
CHX fg endo	odc	22.556		foxa1	23.397	0.841	0.637	0.643049
CHX fg endo	odc	22.293		foxa1	22.554	0.261	0.269	0.829895
uninj untreated fg mesoderm	odc	22.008		foxa1	40	17.992	18.866	2.09299e-06	3.48069e-06	1.20228e-06
uninj untreated fg mesoderm	odc	22.199		foxa1	40	17.801	17.882	4.13982e-06
uninj untreated fg mesoderm	odc	22.065		foxa1	40	17.935	17.858	4.20927e-06
Sample	target	Ct		target	Ct	d Ct	ddCt	2^-ddCt	avg	std dev	t-test p-value	comparison
uninj untreated fg endo	odc	22.136		aldh1a2	40	17.993
uninj untreated fg endo	odc	22.007		aldh1a2	40	17.805
uninj untreated fg endo	odc	22.195		aldh1a2	40	17.805
DMSO fg endo	odc	22.417		aldh1a2	40	17.583	-0.41	1.32869	1.13684	0.200233
DMSO fg endo	odc	22.4		aldh1a2	40	17.6	-0.205	1.15269
DMSO fg endo	odc	22.089		aldh1a2	40	17.911	0.106	0.929161
RA fg endo	odc	22.181		aldh1a2	40	17.819	-0.174	1.12818	1.09857	0.0812644
RA fg endo	odc	22.214		aldh1a2	40	17.786	-0.019	1.01326
RA fg endo	odc	22.402		aldh1a2	40	17.598	-0.207	1.15429
RA + CHX fg endo	odc	22.519		aldh1a2	32.201	9.682	-8.311	317.585	194.473	109.337
RA + CHX fg endo	odc	22.273		aldh1a2	32.782	10.509	-7.296	157.15
RA + CHX fg endo	odc	22.198		aldh1a2	33.239	11.041	-6.764	108.684
CHX fg endo	odc	22.428		aldh1a2	33.502	11.074	-6.919	121.011	131.273	11.6957
CHX fg endo	odc	22.556		aldh1a2	33.191	10.635	-7.17	144.007
CHX fg endo	odc	22.293		aldh1a2	33.089	10.796	-7.009	128.801
uninj untreated fg mesoderm	odc	22.008		aldh1a2	24.743	2.735	-15.258	39184.6	48194.9	7806.7
uninj untreated fg mesoderm	odc	22.199		aldh1a2	24.325	2.126	-15.679	52462.5
uninj untreated fg mesoderm	odc	22.065		aldh1a2	24.178	2.113	-15.692	52937.4
Sample	target	Ct		target	Ct	d Ct	ddCt	2^-ddCt	avg	std dev	t-test p-value	comparison
uninj untreated fg endo	odc	22.136		tbx5	40	17.993
uninj untreated fg endo	odc	22.007		tbx5	40	17.805
uninj untreated fg endo	odc	22.195		tbx5	40	17.805
DMSO fg endo	odc	22.417		tbx5	40	17.583	-0.41	1.32869	1.13684	0.200233
DMSO fg endo	odc	22.4		tbx5	40	17.6	-0.205	1.15269
DMSO fg endo	odc	22.089		tbx5	40	17.911	0.106	0.929161
RA fg endo	odc	22.181		tbx5	40	17.819	-0.174	1.12818	1.09857	0.0750314
RA fg endo	odc	22.214		tbx5	40	17.786	-0.019	1.01326
RA fg endo	odc	22.402		tbx5	40	17.598	-0.207	1.15429
RA + CHX fg endo	odc	22.519		tbx5	40	17.481	-0.512	1.42603	1.16122	0.230881
RA + CHX fg endo	odc	22.273		tbx5	40	17.727	-0.078	1.05555
RA + CHX fg endo	odc	22.198		tbx5	40	17.802	-0.003	1.00208
CHX fg endo	odc	22.428		tbx5	40	17.572	-0.421	1.33886	1.23115	0.141957
CHX fg endo	odc	22.556		tbx5	40	17.444	-0.361	1.28432
CHX fg endo	odc	22.293		tbx5	40	17.707	-0.098	1.07029
uninj untreated fg mesoderm	odc	22.008		tbx5	25.482	3.474	-14.109	17669.8
uninj untreated fg mesoderm	odc	22.199		tbx5	25.614	3.415	-14.185	18625.6
uninj untreated fg mesoderm	odc	22.065		tbx5	25.249	3.184	-14.727	27118.7
