# Supplementary material for: Tbx5 drives Aldh1a2 expression to regulate a RA-Hedgehog-Wnt gene regulatory network coordinating cardiopulmonary development
Source: eLife. 2021 Oct 13;10:e69288. doi: 10.7554/eLife.69288 (PMC8555986; doi:10.7554/eLife.69288)
Supplement: Figure 6—source data 2. — Luciferase source data of Xenopus tropicalis and human Shh MACS1-enhancer-reporter activity at NF34. [file elife-69288-fig6-data2.xlsx]

## Sheet: Sheet1
Fig6E_ Analysis of X.trop, Human Shh MACS1-enhancer-driven luciferase activity at NF34
sample	Firefly	Renilla	Firefly / Renilla	avg	std dev	t-test p-value	comparison
wt trop MACS1 C1 foregut assayed NF34	3192134	13191	241.993	190.357	38.9803
wt trop MACS1 C1 foregut assayed NF34	2786798	12609	221.017
wt trop MACS1 C1 foregut assayed NF34	2119206	12034	176.102
wt trop MACS1 C1 foregut assayed NF34	3070437	21732	141.286
wt trop MACS1 C1 foregut assayed NF34	3756500	21918	171.389
wt trop MACS1 C1 foregut assayed NF34	3187576	20516	155.37
trop MACS1 delta 2 RAR motifs C1 foregut assayed NF34	765900	13979	54.7893	52.5977	16.1543	0.000153899	(vs wt trop MACS1 fg NF34)
trop MACS1 delta 2 RAR motifs C1 foregut assayed NF34	623865	12778	48.8234
trop MACS1 delta 2 RAR motifs C1 foregut assayed NF34	423167	13056	32.4117
trop MACS1 delta 2 RAR motifs C1 foregut assayed NF34	1898803	23312	81.4517
trop MACS1 delta 2 RAR motifs C1 foregut assayed NF34	980452	21387	45.8434
trop MACS1 delta 2 RAR motifs C1 foregut assayed NF34	1141663	21843	52.2668
wt trop MACS1 +dNRAR RNA C1 foregut assayed NF34	98004	17401	5.63209	7.66788	3.17206	9.22931e-05	(vs wt trop MACS1 fg NF34)
wt trop MACS1 +dNRAR RNA C1 foregut assayed NF34	67823	14289	4.74652
wt trop MACS1 +dNRAR RNA C1 foregut assayed NF34	72319	14004	5.16417
wt trop MACS1 +dNRAR RNA C1 foregut assayed NF34	136901	29311	4.67064
wt trop MACS1 +dNRAR RNA C1 foregut assayed NF34	286381	23679	12.0943
wt trop MACS1 +dNRAR RNA C1 foregut assayed NF34	332817	24294	13.6996
wt trop MACS1 C1 foregut + DEAB NF20-34 assayed NF34	43903	14768	2.97285	8.68941	6.32517	8.21468e-05	(vs wt trop MACS1 fg NF34)
wt trop MACS1 C1 foregut + DEAB NF20-34 assayed NF34	61224	15113	4.05108
wt trop MACS1 C1 foregut + DEAB NF20-34 assayed NF34	40090	13902	2.88376
wt trop MACS1 C1 foregut + DEAB NF20-34 assayed NF34	412889	24075	17.1501
wt trop MACS1 C1 foregut + DEAB NF20-34 assayed NF34	273719	26826	10.2035
wt trop MACS1 C1 foregut + DEAB NF20-34 assayed NF34	345982	23259	14.8752
wt trop MACS1 C4 hindgut assayed NF34	123781	14855	12.6032	7.69477	3.79621	9.37692e-05	(vs wt trop MACS1 fg NF34)
wt trop MACS1 C4 hindgut assayed NF34	187220	16029	6.11598
wt trop MACS1 C4 hindgut assayed NF34	98033	14883	6.58691
wt trop MACS1 C4 hindgut assayed NF34	290213	24753	11.7244
wt trop MACS1 C4 hindgut assayed NF34	182510	27542	6.62661
wt trop MACS1 C4 hindgut assayed NF34	57787	23008	2.5116
sample	Firefly	Renilla	Firefly / Renilla	avg	std dev	t-test p-value	comparison
wt Human MACS1 C1 foregut assayed NF34	2321152	16168	143.565	187.443	39.6119
wt Human MACS1 C1 foregut assayed NF34	3279686	15534	211.13
wt Human MACS1 C1 foregut assayed NF34	3031164	15089	200.886
wt Human MACS1 C1 foregut assayed NF34	5304713	22050	240.577
wt Human MACS1 C1 foregut assayed NF34	4908283	25895	189.546
wt Human MACS1 C1 foregut assayed NF34	3369027	24245	138.958
Human MACS1 delta 2 RAR motifs C1 foregut assayed NF34	856703	13891	61.6732	48.4009	13.201	0.00018957	(vs wt Human MACS1 fg NF34)
Human MACS1 delta 2 RAR motifs C1 foregut assayed NF34	777159	13226	58.7599
Human MACS1 delta 2 RAR motifs C1 foregut assayed NF34	838992	15407	54.4552
Human MACS1 delta 2 RAR motifs C1 foregut assayed NF34	765553	24430	31.3366
Human MACS1 delta 2 RAR motifs C1 foregut assayed NF34	867111	22218	39.0274
Human MACS1 delta 2 RAR motifs C1 foregut assayed NF34	1028443	22777	45.1527
wt Human MACS1 + dNRAR RNA C1 foregut assayed NF34	89023	16115	5.52423	15.6482	13.1805	5.0208e-05	(vs wt Human MACS1 fg NF34)
wt Human MACS1 + dNRAR RNA C1 foregut assayed NF34	73101	15377	4.75392
wt Human MACS1 + dNRAR RNA C1 foregut assayed NF34	103621	13644	7.59462
wt Human MACS1 + dNRAR RNA C1 foregut assayed NF34	386985	20691	18.7031
wt Human MACS1 + dNRAR RNA C1 foregut assayed NF34	476104	26715	17.8216
wt Human MACS1 + dNRAR RNA C1 foregut assayed NF34	1002664	25389	39.4921
wt Human MACS1 C1 foregut + DEAB NF20-34 assayed NF34	63221	16998	3.71932	11.1762	9.17218	6.89117e-05	(vs wt Human MACS1 fg NF34)
wt Human MACS1 C1 foregut + DEAB NF20-34 assayed NF34	73824	17244	4.28114
wt Human MACS1 C1 foregut + DEAB NF20-34 assayed NF34	60377	17881	3.3766
wt Human MACS1 C1 foregut + DEAB NF20-34 assayed NF34	435287	26059	16.7039
wt Human MACS1 C1 foregut + DEAB NF20-34 assayed NF34	672090	25732	26.1188
wt Human MACS1 C1 foregut + DEAB NF20-34 assayed NF34	329298	25612	12.8572
wt Human MACS1 C4 hindgut assayed NF34	209936	15476	13.5653	14.4691	4.43414	0.000109917	(vs wt Human MACS1 fg NF34)
wt Human MACS1 C4 hindgut assayed NF34	127334	14223	8.95268
wt Human MACS1 C4 hindgut assayed NF34	153624	15114	10.1644
wt Human MACS1 C4 hindgut assayed NF34	549981	27119	20.2803
wt Human MACS1 C4 hindgut assayed NF34	399951	25366	15.7672
wt Human MACS1 C4 hindgut assayed NF34	452088	24998	18.085
