# Supplementary material for: Tbx5 drives Aldh1a2 expression to regulate a RA-Hedgehog-Wnt gene regulatory network coordinating cardiopulmonary development
Source: eLife journal article supplement (doi:10.7554/elife.69288), 2021-10-13
Supplement: supp [file elife_poa_e69288_Figure_4_figure_supplement_2.docx]

**figure 4_supplement 2**

**CLUSTAL O(1.2.4) multiple sequence alignment for Aldh1a2 “enh1” enhancer**

**Predicted Tbx5 sites CIS-BP: score >10, score >8**

xenTro9 GTGACTAGCCTTTTGCTATTAAATTTGAACAATGGGCTCTCTAGGTGCTT---------GATGGTGATTTACATGGAAACAAGCTCTGCTTTTGCAAGAGGCAGC-CT-----------T

galGal6 GTGAGTAGCCTTCGCAATTG-AGGTTGAACAATGAACTCACTGGGTGTTGTCCAATTTGTAGCATGATTTACATGGAAGCAAGCCCTTCTTTTTTCTAGGGTTATCCCTTTTTCATCTGG

hg38 ---------------------------------GAACTCTCTGGGTGTTGTCCAATTTGTAACATGATTTACATGGAAGCAAGCCCTTCCTT-TCCCGGGGTTATCCCTTTTTCATCTGG

mm10 ---------------------------------GAACTCTCTGGGTGTTGTCCAATTTGTAACATGATTTACATGGAAGCCAGCCCTTCCTT-TCTTAGGGTTATCCCTTTTTCATCTGG

* *** ** **** * * ************** * *** ** * ** ** *

xenTro9 CACTGATAGTTATATATTTTTTCTCTCCAGATAGGATCACTTCATGTCACATAGTTTCTCTGATTTACAGACTTCCCTTACAACAATCACTATAAATTAGAAAGTGGGGGAGGAATGGAA

galGal6 TGTTTAGGATGGGTTATATATAATCCATAGATAGGAACATTTGCTGTCAAATATTCTACCTGATTTAGAGTTAGCCTTTACCACGGTCACTATAAATAAGGGAGA---------GAAAAA

hg38 TGTTTAGGACGGGTTATATATAATCCATAGATAGGAACATTTGCTGTCAAATACTTTTGCTGATTTAGAGCTAGGCCACAGAATGGTCACTATTAATAAAGAAGGAG------------A

mm10 TGTTTAGGACGGGTTATATATAATCCATAGATAGGAACATTTGCTGTCAAATACGCTGGCTGATTTAGAGCTAGGCCACTAAATGGTCACTATTAATAAAGAGGGAGGGAGAGAGAGAGA * * *** * * ** ******** ** ** ***** *** * ******** ** * * ******* *** * * *

xenTro9 TCTA-----ATTTAAGCTTTGCAGGGATTCCTTGTGTTTTCTTGCA**ATGTGTCA**TCACTTGTCCACTACATGGCATTTTTATGAAGTGACCATAATGAAAGTCAGATTAAATGTGCAGGC

galGal6 AAAAAAAAAACAATTTGAGGCTTTGCAGGGATTCCTTGTTCTTGCA**ATGTGTCA**TCGCTTGTCCATTTCATGGCGTTTTTACGAAGTGGCCATAATGAAAGTCAGATTAAATGTACAGGA

hg38 AAAAAAAAACTAATCTGAGACTTTGCAGGGATTCCAGGTTCTTGCT**ATGTGTCA**TCGCTTGTCCAGTCTGTGGCGGTTTTATGAAGTGGCCATAATGAAAGTCAGATTAAATGCACAGGA

mm10 AAAAAAATTCTCATCTGAGACTTTGCAGGGATTCCAGGTTCTTGCT**ATGTGTCA**TCGCTTGTCCAGCCCATGGCGGTTTTACGAAGTGACCATAATGAAAGTCAGATTGAATGCACAGGA

* * * ** ******* ********** ******** **** ***** ****** ******************* **** ****

**Tbx site 1** **Mutant:** **AAAAAAAA**

xenTro9 TATATACATTTAATCAACAGCCATCAGAGTCTGTATAGCTGGAGGAGTTCTAAAAAGCCCCCAGTGAATGCACATTTGCTGCGAAAA---AATTTGGGCTTGGTGGTATGGATGTGTGCA

galGal6 TATATATGTTTAATCAACAGCCGTTGGTGTCAGTACTGCTGGAAGAGTTATAAAAGCCCCCGTGAATGCA--AATTTATTGCAAAAGAATCCAAGTCTTA--GTGGTAGGAATATCTATG

hg38 TATATACATTTAATCAACAGCCATTGGAGTCTGTGGTGCTGGAAGAGTTATAAGAGCCCCATG-AATGCA--AACTTATTGCAAAAGAATTCAAGGGGTG--GGGGAATGAATGTCTGCT

mm10 TACATACATTTAATCAACAGCCATTGGAGCCTGGAGTGCTGCAAGAGTTATAAGAGCCCTGTG-AATGCA--AATTTATGGTGAAAGAATCCAAGGGGCGGGAGGAGATGGATGTCTGCT

** *** ************** * * * * * **** * ***** *** * ** * ** * *** * * * ** * *

xenTro9 GACTGGTACTACCTGACACAGAACACTT-CAGAAATTTAAAAGTGAGTTATTTACGTGTAAGGTTTTCCTTGTAAACCCAACAGCTGGTGGTTTTCAAGACTTGAAACTGTTCCAGAACA

galGal6 GAATGGTACTACCTGACACAGAACACCT-AAAACTTTCAGAAATGAATTATTTAAGTGTAAGGTTTTGCTTGTAAAGCCGCCAGCTGCTGGATTTCAAGACTTGAAACCGTTCCAAAACA

hg38 GAATGGTACTACCTGACACAGGACACCAAAAAACTTTCCAGAGTGAATGATTTAAGTGTAAGGTTTGGCTTGTAAAGCTGCCAGCTGCTTGGTTTCAAAACTTGAAACGTTTCCAAAACA

mm10 GAATGGTACTACCTGACACGGGACACCAAAAGACTTTCCAGAGTGAGGGATTTCAGTGTAAGGTTTGGCTTGTAAAGCTGCCAGCTGCTTGGTTTCAAAACTTGAAACATTTCCAAAACC

** **************** * **** * * ** * *** **** *********** ******** * ****** * * ****** ********* ***** ***

xenTro9 TGAGATGAGGCACTTAATACACACACACGCCCAAGTAAACGCTATGATTTTTACAGCCAATTTAAATGCGATCAACTTGCATTAATAAGAAATTAATGGTGATGCCGTGGTTTGTTTTAG

galGal6 CGGGACTAGGTACTTTATGTGTGCACTAGAGTAAATACTCTG-----ATTTTACTGCCAATTTAAATGTGCTCAGTTTACAGTAATGAGCTTGTATAGGCAATACCTTGTTTATAGAAAG

hg38 TTGGATGAGGCACTTTATATGTGCACTAGAGTAAATACTCTG-----GTTTTACTGCCAATTTAAATGTGCTCAGTTTACAGTAATGAGCTTGTATAGGCATTACCTTGTTTATAGAAAG

mm10 TTAGACAAGGCACTTTATACACGCACTAGAGTAAATACTCTG-----GTTTTACTACCAATTTAAATGTGCTCAGTTTACAGTAATGAGCTTGTATAGGCATTACCTTGTTTATAGAAAG ** *** **** ** *** * ** ** * ****** ************ * *** ** ** **** ** ** ** * ** ** ** **

xenTro9 AGTAAAATGGTGGGGGAAAT---AGTTTGTTCCTGTTGCTATTTAATGTGTCACACTATGATGGGGTTTGCTTTTGTTCTAAGTGATTTGGGTGCTTCAGTGAAACTTCTTGCAGGCCCT

galGal6 TGGAACAGGAAGAAACTAACATTAACCATTAACAGTAGCGATTTCTCTTGCCTTCAACTCTAACTTTATACCAAATAGATCATTCCCATGTCTTATCTGAAATATTTGCCATAATTATTC

hg38 TGGAACAGGAAGAAATGAACATTAACCATTACCAGTAGCAATTCCCATTGCCTTCTACCACAATAT-----TGATGGCAAGTTTAATTTCTTCCAATTTGGGACTGTGTCACAACTGACA

mm10 TGGAACAGGAAGAAATGAACATTAACCAGGACCGGTAGCAGTTCCCATTGCCTTCTGCAACACGGACGGACGGATGGCGAGTCTAGTTTCTTCCAGTTTGGAACTATGTCACAACTGATA * ** * * * ** * * ** ** **

**Tbx site 2** **Mutant:** **AAAAAAAAA**

xenTro9 GTTTCCGCAAACATGAAAAAAATTTGCTATGCCACACACTATGAATGGCTTGTAGATTTTATTATATAGTCTATTTGATAGATTTTCCCAGTGGTTTTTAAGGCTTTTAAACTTTGCATT

galGal6 TTTTTCTAAATCTGTGAGATAGATGGA----GCATTCAGTAAAATACACCTTGTAGTCCCAGTCAACGCGCACTGCAAAACTCTTCTGTAATTCCAAGGCACTGTTTCTTATTTTAAGAA

hg38 TTGGTGT--GTATTTGGCTTTAATGTCATGTTGCTTCAGCAGAGGAACACATGCTGTGATTCAGCTTGCCTCTGTCAAGGCTGATCAGACCAGTTAGTTGTTTCTTACTGTTTTTCCTAA

mm10 CTGGTGTGTGTGCTTGGCTTTGATGCCATGTTGCTCCAACAGAGTCCCAGATGCTGTCATCCAACCAGCTTCTATCAAAGCCACCCACTAGA-----CTGTGTCTTACTATTTTTAGTAT

xenTro9 CCACTTTCTAGGTATTCTCTCAAAATTTTACCCTAATGCAGACTATCCTCCCCAATATATACTGTGGGCCCCACAGGGAGCTATCCCTAAAGCTTAAAATCACTGTACTAGACTGATGTT

galGal6 CACGATCATGTTCTGCGTACAGGCAAAACTGTTGATAGGTGCTCCTCTCAGCAGAACGTAGTTAACATTTTTAAAATCTCTTTAAGAAAGAACAGACCACTTCTGTAAGGGAAAAGTACT

hg38 AACAGATGTCAAGAGACAGATATGGGAATTCTGGGACAGTAGAATAGGTAGGTACCCTGATTACACGTAACTGGGTCTGTTTTAGCCAAGTCTGTTTTCTACAAATGGATCACTCATGGG

mm10 AGCAGATGCAAGTAG-CACAGTTAGGAATTATGGGACAGT-----------------AGAGTATACATAATTGGTTTTGTTTTAGCCAAGCCTGCTTTCTATAAGTGATTTGGTCTCAGG

**Tbx site 3** **Mutant:** **AAA**

xenTro9_dna TTGGTCTGTCTA

galGal6_dna AAACTGCAGTTG

hg38_dna AGCCATTTATTT

mm10_dna AGTCATTTATTT

**AAAAA ­**
