# Supplementary material for: Tbx5 drives Aldh1a2 expression to regulate a RA-Hedgehog-Wnt gene regulatory network coordinating cardiopulmonary development
Source: eLife journal article supplement (doi:10.7554/elife.69288), 2021-10-13
Supplement: supp [file elife_poa_e69288_Figure_5_figure_supplement_2_source_data_1.xlsx]

## Sheet: Sheet1
source data fig5 supplement 2
FGF8 treatment of Xenopus CP-foregut explants +/- cyp26a1/c1 MO
experiment 4 Fgf8 + cyp26a1/c1 MO
sample	housekeep	Ct housekeep		target gene	Ct target gene		delta Ct	dd Ct	relative expression
cont-MO + DMSO	ODC	19.315		shh	26.178		6.863	-0.311	1.24057
cont-MO + DMSO	ODC	18.886		shh	25.169		6.283	-0.217	1.16231
cont-MO + DMSO	ODC	18.975		shh	25.266		6.291	0.063	0.957271
cont-MO + Fgf8 (200ng/mL)	ODC	18.718		shh	29.032		10.314	3.14	0.11344
cont-MO + Fgf8 (200ng/mL)	ODC	18.889		shh	29.114		10.225	3.725	0.0756246
cont-MO + Fgf8 (200ng/mL)	ODC	18.631		shh	28.341		9.71	3.482	0.089498
cyp26-MO + Fgf8 (200ng/mL)	ODC	18.216		shh	25.613		7.397	0.223	0.856782
cyp26-MO + Fgf8 (200ng/mL)	ODC	18.862		shh	25.495		6.633	0.133	0.911933
cyp26-MO + Fgf8 (200ng/mL)	ODC	18.927		shh	25.108		6.181	-0.047	1.03311
cyp26-MO	ODC	18.904		shh	23.822		4.918	-2.256	4.77665
cyp26-MO	ODC	18.839		shh	23.139		4.3	-2.2	4.59479
cyp26-MO	ODC	18.775		shh	23.136		4.361	-1.867	3.64773
uninj untreated	ODC	18.462		shh	25.636		7.174
uninj untreated	ODC	18.579		shh	25.079		6.5
uninj untreated	ODC	19.21		shh	25.438		6.228
cont-MO + DMSO	ODC	19.315		tbx5	21.228		1.913	0.152	0.900002
cont-MO + DMSO	ODC	18.886		tbx5	20.623		1.737	-0.423	1.34071
cont-MO + DMSO	ODC	18.975		tbx5	20.313		1.338	-0.073	1.0519
cont-MO + Fgf8 (200ng/mL)	ODC	18.718		tbx5	24.654		5.936	4.175	0.0553605
cont-MO + Fgf8 (200ng/mL)	ODC	18.889		tbx5	23.985		5.096	2.936	0.13067
cont-MO + Fgf8 (200ng/mL)	ODC	18.631		tbx5	23.104		4.473	3.062	0.119742
cyp26-MO + Fgf8 (200ng/mL)	ODC	18.216		tbx5	20.179		1.963	0.202	0.869345
cyp26-MO + Fgf8 (200ng/mL)	ODC	18.862		tbx5	21.272		2.41	0.25	0.840896
cyp26-MO + Fgf8 (200ng/mL)	ODC	18.927		tbx5	20.879		1.952	0.541	0.687294
cyp26-MO	ODC	18.904		tbx5	19.129		0.225	-1.536	2.89989
cyp26-MO	ODC	18.839		tbx5	19.643		0.804	-1.356	2.55974
cyp26-MO	ODC	18.775		tbx5	19.071		0.296	-1.115	2.16595
uninj untreated	ODC	18.462		tbx5	20.223		1.761
uninj untreated	ODC	18.579		tbx5	20.739		2.16
uninj untreated	ODC	19.21		tbx5	20.621		1.411
cont-MO + DMSO	ODC	19.315		wnt2b	24.496		5.181	-0.202	1.15029
cont-MO + DMSO	ODC	18.886		wnt2b	23.273		4.387	-0.313	1.24229
cont-MO + DMSO	ODC	18.975		wnt2b	23.318		4.343	0.139	0.908148
cont-MO + Fgf8 (200ng/mL)	ODC	18.718		wnt2b	27.837		9.119	3.736	0.0750502
cont-MO + Fgf8 (200ng/mL)	ODC	18.889		wnt2b	27.093		8.204	3.504	0.0881436
cont-MO + Fgf8 (200ng/mL)	ODC	18.631		wnt2b	27.511		8.88	4.676	0.0391186
cyp26-MO + Fgf8 (200ng/mL)	ODC	18.216		wnt2b	22.877		4.661	-0.722	1.64947
cyp26-MO + Fgf8 (200ng/mL)	ODC	18.862		wnt2b	23.4129		4.5509	-0.1491	1.10888
cyp26-MO + Fgf8 (200ng/mL)	ODC	18.927		wnt2b	23.619		4.692	0.488	0.713013
cyp26-MO	ODC	18.904		wnt2b	21.863		2.959	-2.424	5.36657
cyp26-MO	ODC	18.839		wnt2b	21.249		2.41	-2.29	4.89056
cyp26-MO	ODC	18.775		wnt2b	21.048		2.273	-1.931	3.81319
uninj untreated	ODC	18.462		wnt2b	23.845		5.383
uninj untreated	ODC	18.579		wnt2b	23.279		4.7
uninj untreated	ODC	19.21		wnt2b	23.414		4.204
cont-MO + DMSO	ODC	19.315		nkx2-1	24.247		4.932	-0.319	1.24747
cont-MO + DMSO	ODC	18.886		nkx2-1	23.498		4.612	-0.338	1.264
cont-MO + DMSO	ODC	18.975		nkx2-1	23.399		4.424	-0.173	1.1274
cont-MO + Fgf8 (200ng/mL)	ODC	18.718		nkx2-1	26.599		7.881	2.63	0.161544
cont-MO + Fgf8 (200ng/mL)	ODC	18.889		nkx2-1	27.152		8.263	3.313	0.100621
cont-MO + Fgf8 (200ng/mL)	ODC	18.631		nkx2-1	26.628		7.997	3.4	0.0947323
cyp26-MO + Fgf8 (200ng/mL)	ODC	18.216		nkx2-1	23.312		5.096	-0.155	1.11342
cyp26-MO + Fgf8 (200ng/mL)	ODC	18.862		nkx2-1	24.169		5.307	0.357	0.780786
cyp26-MO + Fgf8 (200ng/mL)	ODC	18.927		nkx2-1	23.689		4.762	0.165	0.891929
cyp26-MO	ODC	18.904		nkx2-1	22.522		3.618	-1.633	3.10157
cyp26-MO	ODC	18.839		nkx2-1	22.684		3.845	-1.105	2.15099
cyp26-MO	ODC	18.775		nkx2-1	22.137		3.362	-1.235	2.35381
uninj untreated	ODC	18.462		nkx2-1	23.713		5.251
uninj untreated	ODC	18.579		nkx2-1	23.529		4.95
uninj untreated	ODC	19.21		nkx2-1	23.807		4.597
