# Supplementary material for: Tbx5 drives Aldh1a2 expression to regulate a RA-Hedgehog-Wnt gene regulatory network coordinating cardiopulmonary development
Source: eLife journal article supplement (doi:10.7554/elife.69288), 2021-10-13
Supplement: supp [file elife_poa_e69288_Figure_6_figure_supplement_1.docx]

**Figure 6_supplement 1**

**Shh MACS1 enhancer CLUSTAL O(1.2.4) multiple sequence alignment**

**RAR/RXR sites CIS-BP: score >10, score >8**

xenTro3 ACTGAGATCTAAGGGTACCTCAA**AGGTCA**CACAAACCATCTAATTTCTGCCAATATCCACAATCAGTGTGTACAGAAAGCAAAC--GGTTACCTAGATTGCAATAGTGGCCGTCGCAAGG 118

galGal3 ACTCAGATCAAAGGGGATACAAA**AGGTCA**GAAACCA------AAGCGTGCTACTTTTTAGCACTACTGCACGCAGAAACGGGGCGTTGCTTCAG---------CA-TACGAGGTAGCAAA 104

hg19 ACGCAGATCAAAGAGGCCTGGAA**AGGTCA**CTCAAGC------TGTTCTACTAATACCTAGCACCGGTGTGTACAGAAAGTCCACAGTGTTGCCCAGAATGCA-GC-GGCTAGGCCTGACT 112

mm10 ACTCAGATCAAAGGA-CCTAGAA**AGGTCG-**GAAAGC------TGATGTGCTAATTCC--CCAGCAGTGTGTACAGAAAGCC--TAGTGTGTCCCAAAGTGCAGTG-GCCACTCCTTAGAT 107

** ***** *** ******* * * * * * * ** ****** * *

xenTro3 CTCTTTGATCCTTCCCTATAAACTGTGCTTGCATAAGCCGTTTAATTGAAGTTGGACATTTTATTGCTGCTGTTAAATCTTTCTCATATGCCTTACATTATCTTGCAGCAGAACTTAATG 238

galGal3 TTTCTTTGATCCTATCCATAAATGTCACTTGTGCACGTCATTTAATTGCAGCATAGCCTTTTATTGGTGCAATTAAATCTTTTCAGACGCAT-TACATTATCTCCAGCTTT-GCTAAATG 222

hg19 GCCTTTGATCCTTATCTAGAAACTCTGCTAGCATATGTCATATGATTGAGGTAGGGTCTTTTATTGCTGCAATTAAAACTTCTCAAGTGCAT-TATATTATCTCCGCCCCA-GCTAAAAG 230

mm10 GCCTTTGATCCTTATCTGGAAACTTTGCTAGCATCTGTCCTATAATTGAGGCATAGTCTTTTATTGCTGCAATTAAAACTTTCCAAATGCAC-TATGTTATCTCTGCTCCA-GCTAAAGT 225

** * * * *** ** * * * * * **** * ******** *** ***** *** ** ****** ** **

xenTro3 TCAGTGCCTCTCTTTATAAGCAGATAGTTTTTAGCCTGTGAAATAATGGAGA-----------------GAGCTTTGGCATGTTGCATGTGATT-TCTCCCCAATTTCTCCCTGAGATTT 340

galGal3 TGTTGACCGTTGTTTAGGAAGCTGGGTAA-GTCACTGTGAGATGGGGTGGC---------TGGCGTTAGGTTCGTCCTCCCCTCCCATGTGATTTCTCCCAACAATTTTAATTTAAATCT 332

hg19 TCCCAGACATTGTTTAGAAAGTGGGGTGA-GTGATTTGTCAGATGCTGGGGCGGCTTTAGGGGCTGCTGGCTCCCACACCCTCCAGCACAAGATTTCTCTGACTTTTTTCATTTACATCT 349

mm10 CCAGACCATTGT-TTGAGGGGTGAGGCTA-ACAATCCGTCAGATGCCGGACTTGA-----AGGC--CCAGCTCTCACACACCCCCAACCCGTGACTTCTCTAGCTTTTTCATTTCCATCT 336

** * * * * ** * * ** *

xenTro3 CAGCGCTCGTTAGAACGGAGGG---------------------CAAGGTTTCTGCTGGCGTTGGAGCCATATTTCTGTT----------TATGGCCTGAGTTGGATCTCATGAGAGGATA 429

galGal3 CACCAAACAGTATAATGGTCCTAAAATTTGTTTAGTCGTTTGACTTCCTTTATCACATGGAGATGGTAAACATTCTGTTGCTAACTTGAAGTGGCTCCAAGCAGCCAAACGAGGAGGATA 452

hg19 CACCAAACAGCATAATGGTCTTAAAGTTTGCTTAGTCCTTTGACTTCCTTTATCACATAGAGATGGCAAACATTCTGTTGCTAACTTGAAGTGGCTCCAAGCAGCAGGACTGGAAGGATA 469

mm10 CACCAAACAGCATAATGGTCCTGAAGTTTGTTCATCCCTTTGACTTCCTTTATCACATAGAGATGGCAAACATTCTGTTGCTAACTTGAAGTGGCTCCAAGCTGCAAGCCTGGAAGGATA 456

** * * * ** ** * *** * * * * ******* **** * * ******

xenTro3 TTAACCCAGTAAAAAGCTTATCGCCGATTCATAGATCTGCTGTAAATTCCAGGCCCTTCCATTTTGCTTTTGAGGATTGCCATAAGTCAACACATTAGTAAGCAATTTGCTGACATTAAG 549

galGal3 TTAAACCAGTAAAAGCTTATCAACTGATTCATTGATATGCTGTAAATTCCAG-CCTTTTCATTTTACTTTTGAGGGTTGCCATAAGTCAACACATTAGTAAGCAATTTGCTGACACTGGA 571

hg19 TTAAACCAGTAAAAGCTTATCAACTGATTCATTGATATGCTGTAAATTCCAG-GCTTTTCATTTTGCTTTTGAGGGCGGCCATAAGTCAACACATTAGTAAGCAATTTGCTGACATCAAG 588

mm10 TTAAACCAGTAAAAGCTTATCAGCTGATGCATTGAGATGCTATAAATTCCAG-GCTTTTCATTTTGCTTTTGAGGGTGGCCCTAAGTCAACACATTAGTAAGCAATTTGCTGACATTAGA 575

**** ********* * * *** *** ** **** ********** * ** ****** ********* *** *********************************

xenTro3 ATGGATTACTTGCAAAGAACTACTCCCCAAAGTGCACAA**AGTTCA**CCTAGGTTCTTTTGTTTGTATTTTCTCCCTCGTTTTTTTTTAAT---- 638

galGal3 TCACTTTAAA----AGGCTTC-------CCTGTGGACAA**AGTTCA**CGCCGGTGCTTTGTTTCATCGTTTTGTTTTATCATAGCCTTGTGCTGC 653

hg19 ATGGATCACTTAAAAAGCCCTCC-----TGAGTAGACAG**AGTTCA**CCTGGGTGCTTTTGTTAGTATATTTTTTTTAAATGTTT---------- 666

mm10 TGGATCACTT---AGGACTCTCC-----TGAGCAGACAG**AGTTCA**CCTAAATGCTTTTGTTGGTATTTTTTTTAACTTTT------------- 647

* *** ******* * **** ** * **
