# Supplementary material for: Tbx5 drives Aldh1a2 expression to regulate a RA-Hedgehog-Wnt gene regulatory network coordinating cardiopulmonary development
Source: eLife. 2021 Oct 13;10:e69288. doi: 10.7554/eLife.69288 (PMC8555986; doi:10.7554/eLife.69288)
Supplement: Supplementary file 1. [file elife-69288-supp1.xlsx]

## Sheet: Sheet1
Xenopus Gene	forward	reverse
aldh1a2	5' GAGAGACAAGGGGATAGTCCAA	5'CTAATGCAAAAGCCAGTCGGG
cyp26a1	5' CCCGGAGATTCCTCGAGGTT	5' GACACCACGACCAAGACCCG
cyp26c1	5' TACCAGATCCCCAAAGGCTG	5'TGGCAGTAGTTACCAGCTCC
dhh	5' CAGGTGTGAAGCTACGGGTT	5' GGTTTTCTCTCACCAGTCCCC
dhrs3	5' TTCCTCAATCAGCACTTGAA	5' AGGATGAATGACCTGGAAGA
fgf8	5′ TGG TGA CCG ACC AAC TAA GC	5′ CGA TTA ACT TGG CGT GTG G
fgf10	5' GCAGTGAAAGCCATTAACAGCA	5' AAGGGTTTTTGAAGAAAGTACTGAA
foxa1	5' CTCCTGCTAAACTGGCAGCG	5' AAGCCTGAGTTGCCGTAAGA
foxf1	5' AAC CCT CTG TCC TCC AGC CT	5'GGT TAG TGC AAT GAC TAA CTT C
gli1	5' GAGCTAGTGACCCTGCAAG	5'CATCGGGACCTGCTGTTTCC
hand1	5' ATGAACCTGATTGGGAGCTACC	5'TGACACCTCTCCTGGGTTC
hand2	5' AAGACGACCAGAATGGCGAG	5'CATAAAGGGTCTTCTCGACTCCA
hnf1b	5' GAA GAA AGA GAA GCT TTA GTG G	5'GAC TAT ATC TCA GCC CTT GC
hoxb1	5' CAGGGTCGTCACTGTATCCG	5'TCCTGTACAGCCACATAGGGA
nkx2-1	5'ACGATTCTCCACAATTTCCCGA	5'TTTCTGCTGTTTGAAGCGCC
odc	5'GCCATTGTGAAGACTCTCTCCAATC	5'TTCGGGTGATTCCTTGCCAC
osr1	5'ACCCTTCAAATGCCAGGAG	5'TTTGATTTTGGAAGGCTTGAG
ptf1a	5'ATG GAA ACG GTC CTG GAG CA	5'GAG GAT GAG AAG GAG AAG TTG
shh	5'CAGCGACTTCCTCATGTTCA	5'GGCAGTTAGAGGCGCATAAG
spry2	5'GGTGGTTGCAGACCGAATA	5'TTTCCACAATCCTCACACATTA
tbx1	5' AATCCTGTCTCCTCCCCTCCA	5'TGCAGTGGTTCTGAGCCTTG
tbx5	5' GCC TGC ATG TAT GCT AGT TC	5'GCC TGA TGA GAA GAC TGA TG
tgfbi	5' ACTCTGGCCTGGGAGTTGTA	5'CGTTCTTGCTGCTGAAAGGC
tgfbr2	5' CAAGCTGGAAACCCACAACG	5'CCATCATTTGGTAATCTGGGTGG
wnt2b	5' ACTGGGAGCAAGGGTTATCTGTG	5'GACCCCGTGGCACTTAC
Mouse Gene	forward	reverse
Gapdh	5' TTGATGGCAACAATCTCCAC	5' CGTCCCGTAGACAAAATGGT
Fgf10	5' GAGAAGAACGGCAAGGTCAG	5' TTTCCCCTTCTTGTTCATGG
Fgf8	5' CCGGACCTACCAGCTCTACA	5' AACTCGGACTCTGCTTCCAA
Aldh1a2	5' GCCCAACCTCGAGATCAAGT	5' ATCCACCTTGTCTGCTTCTTG
