# Supplementary material for: Tbx5 drives Aldh1a2 expression to regulate a RA-Hedgehog-Wnt gene regulatory network coordinating cardiopulmonary development
Source: eLife. 2021 Oct 13;10:e69288. doi: 10.7554/eLife.69288 (PMC8555986; doi:10.7554/eLife.69288)
Supplement: Supplementary file 2. [file elife-69288-supp2.xlsx]

## Sheet: Sheet1
supplemental table S2 related to figure1
aSHF and pSHF gene sets identified in deSoysa et al 2019 (GSE126128)
Gene Name	Anterior/Posterior Identity	Population Identity in deSoysa et al 2019
Lefty2	pSHF	A
Aplnr	pSHF	A
Foxf1	pSHF	A
Fst	pSHF	A
Sfrp5	pSHF	A
Aldh1a2	pSHF	A
Arg1	pSHF	A
Pitx2	pSHF	A
Foxc2	pSHF	A
Sfrp1	pSHF	A
Gata6	pSHF	A
Arg1	pSHF	A
Meox1	pSHF	B
Aldh1a2	pSHF	B
Cldn11	pSHF	B
Pbx1	pSHF	B
Ptges	pSHF	B
Nrip1	pSHF	B
Gm15051	pSHF	B
Jund	pSHF	B
Rdh10	pSHF	B
Fzd2	pSHF	B
Pdlim4	pSHF	B
Osr1	pSHF	B
Hoxa1	pSHF	B
Foxf1	pSHF	B
Xist	pSHF	B
mt-Rnr1	pSHF	B
Gm10076	pSHF	B
Crabp2	pSHF	B
Nr2f2	pSHF	B
Ccnd1	pSHF	B
Irx3	pSHF	B
Alx1	pSHF	B
Zfp36l1	pSHF	B
Gm10073	pSHF	B
Hoxb1	pSHF	B
E130012A19Rik	pSHF	B
Gm8186	pSHF	B
Mfge8	pSHF	B
Cdca7	pSHF	B
Fam64a	pSHF	B
Hdgfrp3	pSHF	B
ERDR1	pSHF	B
Hist1h2ap	pSHF	B
Vsnl1	pSHF	B
Wnt2	pSHF	C
Nr2f1	pSHF	C
Nr2f2	pSHF	C
Sfrp5	pSHF	C
Actc1	pSHF	C
Tbx5	pSHF	C
Adm	pSHF	C
Ccdc141	pSHF	C
Gata4	pSHF	C
Tnnt2	pSHF	C
Crip2	pSHF	C
Rrad	pSHF	C
Angpt1	pSHF	C
Fbxo32	pSHF	C
Arhgap31	pSHF	C
Myl7	pSHF	C
Myl4	pSHF	C
Tdrd12	pSHF	C
Sh3bgr	pSHF	C
Gata6	pSHF	C
Csrp3	pSHF	C
Homer2	pSHF	C
Igfbp5	pSHF	C
Atp1b1	pSHF	C
Upp1	pSHF	C
Spag7	pSHF	C
Plagl1	pSHF	C
Sfrp1	pSHF	C
Tnni1	pSHF	C
Tbx20	pSHF	C
AC130654.1	pSHF	C
Nebl	pSHF	C
Arl4a	pSHF	C
Unc45b	pSHF	C
Smarcd3	pSHF	C
Lsp1	pSHF	C
Nexn	pSHF	C
Kitl	pSHF	C
Pbx3	pSHF	C
Btg1	pSHF	C
Tubb2b	pSHF	C
Ly75	pSHF	C
Gata5	pSHF	C
Tmem158	pSHF	C
Hipk2	pSHF	C
Maged2	pSHF	C
Rgs10	pSHF	C
Gyg	pSHF	C
Crip1	pSHF	C
Pdgfra	pSHF	C
Hist1h2ap	pSHF	C
Josd2	pSHF	C
Foxp1	pSHF	C
Ttn	pSHF	C
Crabp2	pSHF	C
Nrp1	pSHF	C
Jund	pSHF	C
Acta2	pSHF	C
Hist1h1b	pSHF	C
Mef2c	pSHF	C
Schip1	AHF	E
Amph	AHF	E
Fhl1	AHF	E
Frzb	AHF	E
Ccnd2	AHF	E
Bambi	AHF	E
Mpped2	AHF	E
Cap2	AHF	E
Car2	AHF	E
Bmp5	AHF	E
Wls	AHF	E
Laptm4b	AHF	E
Rbm24	AHF	E
Tspan7	AHF	E
Dkk1	AHF	E
Rgs5	AHF	E
Nkx2-5	AHF	E
Fgf8	AHF	E
Abcg2	AHF	E
Car4	AHF	E
C530008M17Rik	AHF	E
Tnnc1	AHF	E
Dab2	AHF	E
Capn6	AHF	E
Mef2c	AHF	E
Slc9a3r1	AHF	E
Pvrl2	AHF	E
Meg3	AHF	E
Myl7	AHF	E
Phlda1	AHF	E
Isl1	AHF	E
Spry2	AHF	E
Acta2	AHF	E
Mtap1b	AHF	E
Rasl11a	AHF	E
Dlk1	AHF	F
Bmp4	AHF	F
Col11a1	AHF	F
Col1a2	AHF	F
Myh10	AHF	F
Uaca	AHF	F
Akap5	AHF	F
Crispld1	AHF	F
Arhgap29	AHF	F
Sdpr	AHF	F
Prrx1	AHF	F
Ccnd2	AHF	F
Dpysl3	AHF	F
Pdlim3	AHF	F
Sparc	AHF	F
Lypd1	AHF	F
Cox4i2	AHF	F
Ahnak	AHF	F
Slc2a3	AHF	F
Wls	AHF	F
Mtus2	AHF	F
Rbms3	AHF	F
Lmo2	AHF	F
Tlx1	AHF	F
Fhl1	AHF	F
Peg10	AHF	F
Igf2r	AHF	F
Nkx2-6	AHF	F
Des	AHF	F
Nabp1	AHF	F
Col18a1	AHF	F
Rgs5	AHF	F
AC152063.2	AHF	F
Fam178a	AHF	F
Lima1	AHF	F
Cirbp	AHF	F
Mylk3	AHF	F
St3gal5	AHF	F
Asb4	AHF	F
Tspan9	AHF	F
Pcdh7	AHF	F
Igfbp2	AHF	F
Capn6	AHF	F
Ap1s2	AHF	F
Slc38a4	AHF	F
Lef1	AHF	F
Ptprf	AHF	F
Msx2	AHF	F
Rnd3	AHF	F
Tagln	AHF	F
Fbn1	AHF	F
Smyd1	AHF	F
Hand2	AHF	F
Celf2	AHF	F
C530008M17Rik	AHF	F
Dusp6	AHF	F
Loxl2	AHF	F
Acta2	AHF	F
Stard8	AHF	F
Pmp22	AHF	F
3632451O06Rik	AHF	F
Dok4	AHF	F
Bcam	AHF	F
Egfl7	AHF	F
Epb4.1l5	AHF	F
Amot	AHF	F
Pdgfa	AHF	F
Nkd1	AHF	F
Unc5c	AHF	F
Unc5b	AHF	F
Cnn2	AHF	F
Ccdc80	AHF	F
Myl9	AHF	F
Itm2c	AHF	F
Mtss1	AHF	F
Ier2	AHF	F
Glipr2	AHF	F
Pgk1	AHF	F
Isl1	AHF	F
Anxa2	AHF	F
Zfp36l1	AHF	F
Akap12	AHF	F
Fam176b	AHF	F
Myh7	AHF	F
Sp5	AHF	F
Palld	AHF	F
Zfp462	AHF	F
2610318N02Rik	AHF	F
Lix1	AHF	F
Actn4	AHF	F
Pvrl2	AHF	F
Rbp1	AHF	F
Ext1	AHF	F
S100a11	AHF	F
Spag7	AHF	F
Hs6st2	AHF	F
Ttn	AHF	F
Colec12	AHF	F
Lrrn4	AHF	F
Ube2e2	AHF	F
Tjp1	AHF	F
Rcn3	AHF	F
Mpped2	AHF	F
Arl4c	AHF	F
Apool	AHF	F
Cyr61	AHF	F
Gm10076	AHF	G
Spag7	AHF	G
Pgk1	AHF	G
Ddit4	AHF	G
Xist	AHF	G
Sec61g	AHF	G
Gm10073	AHF	G
Bnip3	AHF	G
Hist1h2ae	AHF	G
Gm8186	AHF	G
Irx3	AHF	G
Hist1h2ap	AHF	G
Mpped2	AHF	G
Igfbp2	AHF	G
Igfbpl1	AHF	G
Fgf8	AHF	G
Pdcd4	AHF	G
Bmp4	AHF	G
Gm266	AHF	H
Nkx2-6	AHF	H
2010300C02Rik	AHF	H
Vamp8	AHF	H
Dusp14	AHF	H
Tlx1	AHF	H
Prdm1	AHF	H
Vamp5	AHF	H
Vcan	AHF	H
Pdcd4	AHF	H
Gng11	AHF	H
Col18a1	AHF	H
Tshz2	AHF	H
Fgf10	AHF	H
Fgf8	AHF	H
Suclg2	AHF	H
Pyy	AHF	H
Isl1	AHF	H
Tgfb1	AHF	H
Jund	AHF	H
Igfbpl1	AHF	H
Spry1	AHF	H
Irx3	AHF	H
Pgk1	AHF	H
Camk2n1	AHF	H
Mpped2	AHF	H
Tpm2	AHF	H
Tbx1	AHF	H
Zfp36l1	AHF	H
Crabp2	AHF	H
Igdcc3	AHF	H
Irx2	AHF	H
Loxl2	AHF	H
Ddit4	AHF	H
Irx1	AHF	H
Ankrd6	AHF	H
Mpzl1	AHF	H
Il17rd	AHF	H
Gpx3	AHF	H
Cntfr	AHF	H
Pnrc1	AHF	H
Egfl7	AHF	H
Amot	AHF	H
Eri3	AHF	H
Bnip3	AHF	H
Kdr	AHF	H
Olfml3	AHF	H
Gsta4	AHF	H
Myh7	AHF	H
B3galnt1	AHF	H
Rbp1	AHF	H
Sall1	AHF	H
Rcsd1	AHF	H
Pla2g16	AHF	H
Gm1673	AHF	H
Spag7	AHF	H
Ak1	AHF	H
Uba52	AHF	H
Irx5	AHF	H
Mfap2	AHF	H
Pdlim1	AHF	H
Auts2	AHF	H
Ablim1	AHF	H
Fbn2	AHF	H
Capn6	AHF	H
Arg1	AHF	H
Ociad2	AHF	H
Xist	AHF	H
Aard	AHF	H
Hist1h2ap	AHF	H
Fgf8	AHF	I
Tbx1	AHF	I
Epha2	AHF	I
Igfbpl1	AHF	I
Exoc3l4	AHF	I
Frzb	AHF	I
Fst	AHF	I
Junb	AHF	I
Car2	AHF	I
Pdcd4	AHF	I
Prdm1	AHF	I
Lefty2	AHF	I
Nodal	AHF	I
Sox9	AHF	I
Ifitm3	AHF	I
Irx5	AHF	I
Gm266	AHF	I
Clu	AHF	I
Vamp8	AHF	I
Lefty1	AHF	I
Tspan12	AHF	I
Tspan7	AHF	I
B3galnt1	AHF	I
Spred1	AHF	I
Api5	AHF	I
Frat2	AHF	I
Hey1	AHF	I
Spats2l	AHF	I
Dars	AHF	I
Isl1	AHF	I
Irx1	AHF	I
Pkdcc	AHF	I
Laptm4b	AHF	I
Pphln1	AHF	I
Dab2	AHF	I
Pitx2	AHF	I
Hapln1	AHF	I
