# Supplementary material for: Tbx5 drives Aldh1a2 expression to regulate a RA-Hedgehog-Wnt gene regulatory network coordinating cardiopulmonary development
Source: eLife. 2021 Oct 13;10:e69288. doi: 10.7554/eLife.69288 (PMC8555986; doi:10.7554/eLife.69288)
Supplement: Supplementary file 3. [file elife-69288-supp3.xlsx]

## Sheet: Sheet1
supplemental table S2 related to figure1
CPP/Lung and Pharynx gene sets identified in Han et al 2020 (GSE136689)
CPP/lung ( gene list combines e_b0, m_b2, m_b3, m_b4 in Han et al 2020)	cell identity
Osr1	CPP/lung
Mecom	CPP/lung
Fth1	CPP/lung
Shh	CPP/lung
Apela	CPP/lung
Nr2f2	CPP/lung
Raet1e	CPP/lung
Ripply3	CPP/lung
Hotairm1	CPP/lung
Hoxa1	CPP/lung
Hmgn3	CPP/lung
Dleu7	CPP/lung
Slc2a3	CPP/lung
E030030I06Rik	CPP/lung
Pbx1	CPP/lung
Abhd11os	CPP/lung
Sox2	CPP/lung
Npnt	CPP/lung
Metrn	CPP/lung
Mycn	CPP/lung
Meis1	CPP/lung
Mapre2	CPP/lung
Rasl11b	CPP/lung
1700011H14Rik	CPP/lung
Foxa2	CPP/lung
Odc1	CPP/lung
Vcan	CPP/lung
E130012A19Rik	CPP/lung
Cpm	CPP/lung
Capn6	CPP/lung
Zfp703	CPP/lung
Foxa1	CPP/lung
Msmo1	CPP/lung
Col18a1	CPP/lung
Hmgcs1	CPP/lung
Sfrp5	CPP/lung
Vsnl1	CPP/lung
Wnt2	CPP/lung
Myl4	CPP/lung
Shox2	CPP/lung
Csrp3	CPP/lung
Tnnt2	CPP/lung
Tnni1	CPP/lung
Map1b	CPP/lung
Fbxo32	CPP/lung
Dstn	CPP/lung
Igfbp5	CPP/lung
Tbx18	CPP/lung
Actc1	CPP/lung
Cacna2d2	CPP/lung
H19	CPP/lung
Maged2	CPP/lung
Smarcd3	CPP/lung
Gyg	CPP/lung
Lrrc39	CPP/lung
Nexn	CPP/lung
Myl1	CPP/lung
Ttn	CPP/lung
Adm	CPP/lung
Gata4	CPP/lung
Gpx3	CPP/lung
Crip2	CPP/lung
Ccdc141	CPP/lung
Crip1	CPP/lung
Angpt1	CPP/lung
Acta2	CPP/lung
Rbm24	CPP/lung
Asb4	CPP/lung
Arhgap31	CPP/lung
Tuba1a	CPP/lung
Unc45b	CPP/lung
Fitm1	CPP/lung
Gata6	CPP/lung
Sfrp1	CPP/lung
Atp1b1	CPP/lung
Tpm1	CPP/lung
Tbx5	CPP/lung
Slc1a3	CPP/lung
Lbh	CPP/lung
Mgarp	CPP/lung
Myl7	CPP/lung
Igf2	CPP/lung
Atp2a2	CPP/lung
Mef2c	CPP/lung
Tgfb2	CPP/lung
Bambi	CPP/lung
Cnn1	CPP/lung
Dok4	CPP/lung
Lpl	CPP/lung
Nrp1	CPP/lung
Alcam	CPP/lung
Gucy1a3	CPP/lung
Tnnc1	CPP/lung
Csrp2	CPP/lung
Cnn2	CPP/lung
Homer2	CPP/lung
Rbpms2	CPP/lung
Tgfb1i1	CPP/lung
Tcea3	CPP/lung
Sh3bgr	CPP/lung
Lxn	CPP/lung
Nebl	CPP/lung
Tbx20	CPP/lung
Smtnl2	CPP/lung
Stard10	CPP/lung
Ppic	CPP/lung
Nr2f1	CPP/lung
Popdc2	CPP/lung
Bmp2	CPP/lung
Smoc2	CPP/lung
Hey1	CPP/lung
Ephb1	CPP/lung
Bves	CPP/lung
Plagl1	CPP/lung
Cryab	CPP/lung
Kitl	CPP/lung
Myl6	CPP/lung
Pbx3	CPP/lung
Gata5	CPP/lung
Ddt	CPP/lung
Abracl	CPP/lung
Reep5	CPP/lung
Igf2r	CPP/lung
Pdlim7	CPP/lung
Slc25a4	CPP/lung
Cap2	CPP/lung
1010001N08Rik	CPP/lung
Pla2g12a	CPP/lung
Fermt2	CPP/lung
Rhoc	CPP/lung
Mmd	CPP/lung
Zbtb20	CPP/lung
Trabd2b	CPP/lung
Spon1	CPP/lung
Lsp1	CPP/lung
Tagln	CPP/lung
Ugdh	CPP/lung
Cdkn1c	CPP/lung
Ptges3l	CPP/lung
Jun	CPP/lung
Anxa5	CPP/lung
Add3	CPP/lung
Cbfa2t3	CPP/lung
Flrt2	CPP/lung
Rras2	CPP/lung
Flrt3	CPP/lung
Pgm2	CPP/lung
Ppp1r1a	CPP/lung
Myl9	CPP/lung
Vim	CPP/lung
Shisa2	CPP/lung
Smim14	CPP/lung
Lgals1	CPP/lung
Cox17	CPP/lung
Gpx7	CPP/lung
Cited2	CPP/lung
Phlda2	CPP/lung
Phactr2	CPP/lung
Camk2d	CPP/lung
Nr2f2	CPP/lung
Ank3	CPP/lung
Pdlim5	CPP/lung
Chchd10	CPP/lung
P3h4	CPP/lung
Casp6	CPP/lung
Mab21l2	CPP/lung
Acaa2	CPP/lung
Fam96b	CPP/lung
S100a10	CPP/lung
Clic1	CPP/lung
Dusp9	CPP/lung
Ddc	CPP/lung
Josd2	CPP/lung
Speg	CPP/lung
Hcfc1r1	CPP/lung
6330403K07Rik	CPP/lung
Hadh	CPP/lung
Wnt4	CPP/lung
Cldn11	CPP/lung
Aldh1a2	CPP/lung
Foxd1	CPP/lung
Osr1	CPP/lung
Pdlim4	CPP/lung
Cxcl12	CPP/lung
Arg1	CPP/lung
Rspo1	CPP/lung
Cxcl13	CPP/lung
Pbx1	CPP/lung
Sparcl1	CPP/lung
Foxf1	CPP/lung
Edn3	CPP/lung
Foxc1	CPP/lung
Nr2f1	CPP/lung
Chd3	CPP/lung
Plpp3	CPP/lung
Pcbp4	CPP/lung
Ncl	CPP/lung
Sox11	CPP/lung
Marcks	CPP/lung
Nrip1	CPP/lung
Ccnd1	CPP/lung
Spsb4	CPP/lung
Mycn	CPP/lung
Epha7	CPP/lung
Fxyd6	CPP/lung
Sox4	CPP/lung
Nrep	CPP/lung
Ptch1	CPP/lung
Socs2	CPP/lung
Zfp277	CPP/lung
Tbx5	CPP/lung
Foxp1	CPP/lung
Foxp2	CPP/lung
E130012A19Rik	CPP/lung
Slc9a3r1	CPP/lung
Arl4a	CPP/lung
Osr1	CPP/lung
Nkx2-5	CPP/lung
Tdrd12	CPP/lung
Jag1	CPP/lung
Wnt2	CPP/lung
Tbx5	CPP/lung
Dock9	CPP/lung
Homer2	CPP/lung
Gata5	CPP/lung
Fam19a1	CPP/lung
Sparcl1	CPP/lung
1010001N08Rik	CPP/lung
Uchl1	CPP/lung
Nr2f2	CPP/lung
Aldh1a2	CPP/lung
Bmp4	CPP/lung
Snrpn	CPP/lung
Ptch1	CPP/lung
Dusp9	CPP/lung
Bex1	CPP/lung
Sms	CPP/lung
Bcat1	CPP/lung
Tgfb2	CPP/lung
Chd3	CPP/lung
Ngfrap1	CPP/lung
Id2	CPP/lung
Limch1	CPP/lung
1190002N15Rik	CPP/lung
Apela	CPP/lung
Unc5c	CPP/lung
Svep1	CPP/lung
Insig1	CPP/lung
Plpp3	CPP/lung
Hapln1	CPP/lung
Runx1t1	CPP/lung
Gata6	CPP/lung
Dpysl3	CPP/lung
Polg	CPP/lung
Ccdc141	CPP/lung
Mllt3	CPP/lung
Gata4	CPP/lung
Vgll4	CPP/lung
Fdps	CPP/lung
Fam213a	CPP/lung
Msmo1	CPP/lung
Ntng1	CPP/lung
Pdgfra	CPP/lung
Josd2	CPP/lung
Elovl6	CPP/lung
Gsto1	CPP/lung
Wfdc2	CPP/lung
Pitx2	CPP/lung
pharynx (gene list combines e_b4, m_b0, m_b9 from Han et al 2020)	cell identity
Gm266	vPharynx
Meox1	vPharynx
Tbx1	vPharynx
Irx1	vPharynx
Arg1	vPharynx
Nrg1	vPharynx
Npm3	vPharynx
Aplnr	vPharynx
Vamp8	vPharynx
Prrx2	vPharynx
Vamp5	vPharynx
Gng11	vPharynx
Crabp1	vPharynx
Hoxa1	vPharynx
Col26a1	vPharynx
Eya1	vPharynx
Irx3	vPharynx
Dusp14	vPharynx
Grem1	vPharynx
Irx2	vPharynx
Fgf8	vPharynx
Pla2g16	vPharynx
Ebf1	vPharynx
Rdh10	vPharynx
Hotairm1	vPharynx
Eva1b	vPharynx
Prdm1	vPharynx
Tshz2	vPharynx
Foxc2	vPharynx
Irx5	vPharynx
Igfbp4	vPharynx
Fam212a	vPharynx
Meis2	vPharynx
Prrx1	vPharynx
Tagln2	vPharynx
Crnde	vPharynx
Smoc1	vPharynx
Wnt5a	vPharynx
Mfap2	vPharynx
Traf3ip2	vPharynx
Basp1	vPharynx
Crabp2	vPharynx
Mef2c	vPharynx
Foxc1	vPharynx
Sall1	vPharynx
Prtg	vPharynx
Des	vPharynx
Fxyd6	vPharynx
Fgf10	vPharynx
Ldha	vPharynx
Plat	vPharynx
Kdr	vPharynx
Cdo1	vPharynx
Etv5	vPharynx
Mdfi	vPharynx
Itm2b	vPharynx
Fabp5	vPharynx
Rcsd1	vPharynx
Pgf	vPharynx
Cntfr	vPharynx
Adh5	vPharynx
Pbx1	vPharynx
Sh3d19	vPharynx
Cadm1	vPharynx
Mfge8	vPharynx
Cdh11	vPharynx
Pdgfrb	vPharynx
Igfbpl1	vPharynx
Clmp	vPharynx
Stra6	vPharynx
Dusp6	vPharynx
Impdh2	vPharynx
Tenm4	vPharynx
Bnip3l	vPharynx
Igdcc3	vPharynx
Aes	vPharynx
Fam213a	vPharynx
Mfap4	vPharynx
Eif2b2	vPharynx
Fn1	vPharynx
Gpsm3	vPharynx
Nnat	vPharynx
Zfp36l1	vPharynx
Tshz1	vPharynx
Apoe	vPharynx
Fndc3a	vPharynx
Efna5	vPharynx
Tcf7l1	vPharynx
Gsta4	vPharynx
Ddit4	vPharynx
Hoxb3os	vPharynx
Syce2	vPharynx
Nkx2-6	vPharynx
Edn1	vPharynx
Ebf2	vPharynx
Tlx1	vPharynx
Ubash3b	vPharynx
Ebf3	vPharynx
Ebf1	vPharynx
Fst	vPharynx
Gng11	vPharynx
Epha2	vPharynx
Six1	vPharynx
Dusp6	vPharynx
Cd40	vPharynx
Igfbpl1	vPharynx
Col25a1	vPharynx
Sel1l3	vPharynx
Gm266	vPharynx
Itpr1	vPharynx
Fn1	vPharynx
Tbx1	vPharynx
Gbx2	vPharynx
Etv5	vPharynx
Id1	vPharynx
Sema5a	vPharynx
Prkcb	vPharynx
Vamp5	vPharynx
Prrx2	vPharynx
Grrp1	vPharynx
Eef1b2	vPharynx
Eef1a1	vPharynx
Ndufa4l2	vPharynx
Nrg1	vPharynx
B3galnt1	vPharynx
Nnat	vPharynx
Sh3d19	vPharynx
Id3	vPharynx
Socs2	vPharynx
Pkm	vPharynx
Pcp4	vPharynx
Ier2	vPharynx
Cited2	vPharynx
Col26a1	vPharynx
Tpi1	vPharynx
Capn6	vPharynx
Igfbp3	vPharynx
Eri3	vPharynx
Eef1g	vPharynx
Rgs2	vPharynx
Eef2	vPharynx
Fam212a	vPharynx
Spats2l	vPharynx
Pla2g16	vPharynx
Npm3	vPharynx
Efnb1	vPharynx
2010300C02Rik	vPharynx
Mdfi	vPharynx
Elavl2	vPharynx
Prtg	vPharynx
Rab11fip1	vPharynx
Spry2	vPharynx
Celf2	vPharynx
Ppm1l	vPharynx
Bnip3l	vPharynx
Il17rd	vPharynx
Loxl2	vPharynx
Cox4i2	vPharynx
Sall1	vPharynx
Isl1	vPharynx
Adamts9	vPharynx
Nuak1	vPharynx
Tpd52	vPharynx
Cdo1	vPharynx
Spred1	vPharynx
Crabp1	vPharynx
Gas2	vPharynx
Tshz2	vPharynx
Arid3b	vPharynx
Ldha	vPharynx
Ddit4	vPharynx
Col18a1	vPharynx
Igfbp4	vPharynx
Id2	vPharynx
St6galnac6	vPharynx
Nkain4	vPharynx
Mpzl1	vPharynx
Ubl3	vPharynx
Olfml3	vPharynx
Tcf7l2	vPharynx
Snai2	vPharynx
Nedd4	vPharynx
Pgam1	vPharynx
Mtch1	vPharynx
Srgap1	vPharynx
Irx5	vPharynx
Ppp3ca	vPharynx
Etv1	vPharynx
Aldoa	vPharynx
Chn1	vPharynx
Col2a1	vPharynx
Fam101b	vPharynx
Tpm2	vPharynx
Crabp2	vPharynx
2610318N02Rik	vPharynx
Lef1	vPharynx
Car14	vPharynx
Pgf	vPharynx
Fhl1	vPharynx
Fgf8	vPharynx
Shisa2	vPharynx
Pdcd4	vPharynx
Snhg12	vPharynx
Cecr2	vPharynx
Irx3	vPharynx
Kdr	vPharynx
Pgk1	vPharynx
Nkx2-3	vPharynx
Foxe1	vPharynx
Nkx2-5	vPharynx
Gm12446	vPharynx
Gm20467	vPharynx
Bmp4	vPharynx
Nrxn3	vPharynx
Mest	vPharynx
Tmsb4x	vPharynx
Fhl1	vPharynx
Id1	vPharynx
Isl1	vPharynx
Tbx3	vPharynx
Igfbp5	vPharynx
Pcdh7	vPharynx
Frzb	vPharynx
Dok5	vPharynx
Nuak1	vPharynx
Ptpre	vPharynx
Unc5c	vPharynx
Id3	vPharynx
Shisa2	vPharynx
Unc5b	vPharynx
Tgfb2	vPharynx
Dmrta2	vPharynx
Aard	vPharynx
Igf2	vPharynx
Bambi	vPharynx
H19	vPharynx
Igfbp3	vPharynx
Klk8	vPharynx
Ngfrap1	vPharynx
Socs2	vPharynx
Efna1	vPharynx
Mocs1	vPharynx
Des	vPharynx
Nkx2-6	vPharynx
Gata3	vPharynx
Frmd4b	vPharynx
Pax9	vPharynx
Spin2c	vPharynx
Cystm1	vPharynx
Dusp6	vPharynx
Gpc3	vPharynx
Bcam	vPharynx
Csrp2	vPharynx
Prrx2	vPharynx
Cotl1	vPharynx
Col2a1	vPharynx
Msx1	vPharynx
Atox1	vPharynx
Il17rd	vPharynx
Slit2	vPharynx
Nnat	vPharynx
Meis2	vPharynx
Cldn3	vPharynx
Pid1	vPharynx
Pyy	vPharynx
Ap1s2	vPharynx
Tspan7	vPharynx
Pdgfa	vPharynx
Sall1	vPharynx
Edn3	vPharynx
Pim1	vPharynx
Bcl2	vPharynx
Cd24a	vPharynx
Sox2	vPharynx
Clip1	vPharynx
Cdh3	vPharynx
Homer2	vPharynx
Piezo1	vPharynx
Pmp22	vPharynx
Rhou	vPharynx
Col18a1	vPharynx
Itga3	vPharynx
Tmem54	vPharynx
Crabp2	vPharynx
Jarid2	vPharynx
Arid3b	vPharynx
Fbn2	vPharynx
Tceal5	vPharynx
Tmem88	vPharynx
Rdx	vPharynx
Ltbp1	vPharynx
Capn6	vPharynx
Podxl	vPharynx
Ammecr1	vPharynx
Tmem2	vPharynx
H1fx	vPharynx
Parm1	vPharynx
Mbnl2	vPharynx
Limch1	vPharynx
